# Supplementary material
Source: MDPI journal article supplement (https://www.mdpi.com/1424-8247/15/10/1262)

## Supporting Information

### **Identification of Novel Cyanopyridones and Pyrido[2,3-*d*]pyrimidines as anticancer agents with dual VEGFR-2/HER-2 inhibitory action: Synthesis, biological evaluation and molecular docking studies**

Tarfah Al-Warhi, Al-Aliaa M. Sallam, Loah R Hemeda, Mahmoud A. El Hassab\*, Nada Aljaeed, Ohoud J. Alotaibi, Ahmed S. Doghish, Mina Noshy, Wagdy M. Eldehna\*, and Mona H. Ibrahim

#### **Tables of Contents**

|                                                           |             |
|-----------------------------------------------------------|-------------|
| <b>1. Physical and spectral data for target compounds</b> | <b>2-6</b>  |
| <b>2. Cell viability assay</b>                            | <b>7</b>    |
| <b>3. Statistical analysis</b>                            | <b>7</b>    |
| <b>4. Molecular dynamics</b>                              | <b>7-8</b>  |
| <b>5. NMR Spectra</b>                                     | <b>9-30</b> |

## 1. Physical and spectral data for target compounds

**5.1.2.1. 6-Amino-2-oxo-4-phenyl-1-(3-(trifluoromethyl)phenyl)-1,2-dihydropyridine-3,5-dicarbonitrile (5a).** Yield 90 %; **M.P.** 280-282 °C; **IR** (KBr, cm<sup>-1</sup>): 3317, 3278 (NH<sub>2</sub>), 2194 (C≡N), 1655 (C=O), 1631 (C=N), 1603 (C=C); **<sup>1</sup>H NMR** (400 MHz, DMSO-*d*<sub>6</sub>)  $\delta$  (ppm): 7.51(d, 1H, H<sub>4</sub> CF<sub>3</sub>-C<sub>6</sub>H<sub>4</sub>, *J* = 4.8 Hz), 7.53 (t, 1H, H<sub>5</sub> CF<sub>3</sub>-C<sub>6</sub>H<sub>4</sub>, *J* = 2.8 Hz), 7.57 (d, 2H, H<sub>2,6</sub> C<sub>6</sub>H<sub>5</sub>, *J* = 4 Hz), 7.60 - 7.67 (t, 1H, H<sub>4</sub> C<sub>6</sub>H<sub>5</sub>, *J* = 8 Hz), 7.76 (d, 2H, H<sub>3,5</sub> C<sub>6</sub>H<sub>5</sub>, *J* = 8 Hz), 7.80 (s, 1H, H<sub>2</sub> CF<sub>3</sub>-C<sub>6</sub>H<sub>4</sub>), 7.85 (d, 2H, H<sub>6</sub> CF<sub>3</sub>-C<sub>6</sub>H<sub>4</sub>, *J* = 8 Hz), 8.26 (s, 2H, NH<sub>2</sub>; exchangeable with D<sub>2</sub>O); **<sup>13</sup>C NMR** (100 MHz, DMSO-*d*<sub>6</sub>)  $\delta$  (ppm): 77.95, 84.48, 117.62, 118.01, 123.03, 125.74, 126.38, 126.38, 128.36, 129.05, 130.91, 131.45, 134.01, 135.94, 136.99, 158.24, 160.70, 161.19; **MS**, *m/z*: 380 (M<sup>+</sup>, 100 %), 381 [(M+1)<sup>+</sup>, 15.73 %], 382 [(M+2)<sup>+</sup>, 1.46 %]; Anal. Calcd. For C<sub>20</sub>H<sub>11</sub>F<sub>3</sub>N<sub>4</sub>O (381.1): C, 63.16; H, 2.92; N, 14.73, Found: C, 63.14; H, 2.91; N, 14.74.

**5.1.2.2. 6-Amino-4-(4-hydroxyphenyl)-2-oxo-1-(3-(trifluoromethyl)phenyl)-1,2-dihydropyridine-3,5-dicarbonitrile (5b).** Yield 88 %; **M.P.** 330 - 332 °C; **IR** (KBr, cm<sup>-1</sup>): 3406 (OH), 3317, 3299 (NH<sub>2</sub>), 2194 (2 C≡N), 1651 (C=O), 1631 (C=N), 1604 (C=C); **<sup>1</sup>H NMR** (400 MHz, DMSO-*d*<sub>6</sub>)  $\delta$  (ppm): 4.45 (s, 2H, NH<sub>2</sub>; exchangeable with D<sub>2</sub>O), 6.95 (d, 2H, H<sub>3,5</sub> C<sub>6</sub>H<sub>4</sub>, *J* = 8 Hz), 7.40 (d, 2H, H<sub>2,6</sub> C<sub>6</sub>H<sub>4</sub>, *J* = 8 Hz), 7.73 (d, 1H, H<sub>4</sub> CF<sub>3</sub>-C<sub>6</sub>H<sub>4</sub>, *J* = 8 Hz), 7.81 – 7.84 (t, 1H, H<sub>5</sub> CF<sub>3</sub>-C<sub>6</sub>H<sub>4</sub>, *J* = 4 Hz), 7.93 – 8.00 (m, 2H, H<sub>2,6</sub> CF<sub>3</sub>-C<sub>6</sub>H<sub>4</sub>), 10.13 (s, 1H, OH; exchangeable with D<sub>2</sub>O); **<sup>13</sup>C NMR** (100 MHz, DMSO-*d*<sub>6</sub>)  $\delta$  (ppm): 75.75, 88.06, 115.84, 116.59, 117.18, 122.94, 125.64, 126.74, 127.35, 130.35, 131.28, 131.96, 133.67, 135.36, 157.65, 159.97, 160.27, 161.93; **MS**, *m/z*: 396 (M<sup>+</sup>, 100 %); Anal. Calcd. For C<sub>20</sub>H<sub>11</sub>F<sub>3</sub>N<sub>4</sub>O<sub>2</sub> (396.1): C, 60.61; H, 2.80; N, 14.14, Found: C, 60.63; H, 2.79; N, 14.13.

**5.1.2.3. 6-Amino-4-(4-nitrophenyl)-2-oxo-1-(3-(trifluoromethyl)phenyl)-1,2-dihydropyridine-3,5-dicarbonitrile (5c).** Yield 86 %; **M.P.** 229 - 230 °C; **IR** (KBr, cm<sup>-1</sup>): 3375, 3321 (NH<sub>2</sub>), 2206, 2191 (2 C≡N), 1680 (C=O), 1635 (C=N), 1612 (C=C) 1527, 1330 (NO<sub>2</sub>); **<sup>1</sup>H NMR** (400 MHz, DMSO-*d*<sub>6</sub>)  $\delta$  (ppm): 4.44 (s, 2H, NH<sub>2</sub>; exchangeable with D<sub>2</sub>O), 7.59 (d, 1H, H<sub>4</sub> CF<sub>3</sub>-C<sub>6</sub>H<sub>4</sub>, *J* = 8 Hz), 7.70 (s, 1H, H<sub>2</sub> CF<sub>3</sub>-C<sub>6</sub>H<sub>4</sub>), 7.75 – 7.76 (t, 1H, H<sub>5</sub> CF<sub>3</sub>-C<sub>6</sub>H<sub>4</sub>, *J* = 4 Hz), 7.78 (d, 1H, H<sub>6</sub> CF<sub>3</sub>-C<sub>6</sub>H<sub>4</sub>, *J* = 8 Hz), 7.80 (d, 2H, H<sub>3,5</sub> C<sub>6</sub>H<sub>4</sub>, *J* = 8 Hz), 8.40 (d, 2H, H<sub>2,6</sub> C<sub>6</sub>H<sub>4</sub>, *J* = 8 Hz); **<sup>13</sup>C NMR** (100 MHz, DMSO-*d*<sub>6</sub>)  $\delta$

(ppm): 79.18, 81.62, 118.07, 118.40, 123.05, 124.27, 125.76, 126.86, 126.90, 130.12, 130.94, 131.21, 134.19, 137.81, 148.58, 157.88, 158.26, 161.61; **MS**, m/z: 425 ( $M^+$ , 16.37 %); Anal. Calcd. For  $C_{20}H_{10}F_3N_5O_3$  (425.1): C, 56.48; H, 2.37; N, 16.47, Found: C, 56.50; H, 2.38; N, 16.46.

**5.1.2.4. 6-Amino-4-(4-chlorophenyl)-2-oxo-1-(3-(trifluoromethyl)phenyl)-1,2-dihydropyridine-3,5-dicarbonitrile (5d).** Yield 95 %; **M.P.** 324 - 326 °C; **IR** (KBr,  $cm^{-1}$ ): 3303, 3286 ( $NH_2$ ), 2210, 2198 ( $2C\equiv N$ ), 1689 ( $C=O$ ), 1631 ( $C=N$ ), 1606 ( $C=C$ );  **$^1H$  NMR** (400 MHz,  $DMSO-d_6$ )  $\delta$  (ppm): 7.57 (d, 2H,  $H_{2,6}$   $C_6H_4$ ,  $J = 8$  Hz), 7.69 (t, 1H,  $H_5$   $CF_3-C_6H_4$ ,  $J = 2.4$  Hz), 7.70 (d, 2H,  $H_{3,5}$   $C_6H_4$ ,  $J = 8$  Hz), 7.75 (s, 1H,  $H_2$   $CF_3-C_6H_4$ ), 7.82 (d, 1H,  $H_4$   $CF_3-C_6H_4$ ,  $J = 8$  Hz), 7.92 (d, 1H,  $H_6$   $CF_3-C_6H_4$ ,  $J = 8$  Hz), 8.13 (s, 2H,  $NH_2$ ; exchangeable with  $D_2O$ );  **$^{13}C$  NMR** (100 MHz,  $DMSO-d_6$ )  $\delta$  (ppm): 94.40, 102.54, 120.70, 123.05, 125.89, 126.57, 127.74, 130.39, 133.07, 133.71, 137.89, 138.73, 147.56, 150.78, 150.95, 156.37, 158.88, 161.41; **MS**, m/z: 414 ( $M^+$ , 100 %), 415 [ $(M+1)^+$ , 0.21 %]; Anal. Calcd. For  $C_{20}H_{10}ClF_3N_4O$  (414): C, 57.92; H, 2.43; N, 13.51, Found: C, 57.93; H, 2.42; N, 13.50.

**5.1.2.5. 6-Amino-4-(2,4-dichlorophenyl)-2-oxo-1-(3-(trifluoromethyl)phenyl)-1,2-dihydropyridine-3,5-dicarbonitrile (5e).** Yield 80 %; **M.P.** 239 - 241 °C; **IR** (KBr,  $cm^{-1}$ ): 3325, 3282 ( $NH_2$ ), 2194 ( $2C\equiv N$ ), 1643 ( $C=O$ ), 1632 ( $C=N$ ), 1603 ( $C=C$ );  **$^1H$  NMR** (400 MHz,  $DMSO-d_6$ )  $\delta$  (ppm): 6.13 (s, 2H,  $NH_2$ ; exchangeable with  $D_2O$ ), 7.50 (d, 1H,  $H_6$   $C_6H_3$ ,  $J = 8$  Hz), 7.57 (d, 1H,  $H_5$   $C_6H_3$ ,  $J = 4$  Hz), 7.61 (s, 1H,  $H_3$   $C_6H_3$ ), 7.63 (d, 1H,  $H_4$   $CF_3-C_6H_4$ ,  $J = 10$  Hz), 7.72 – 7.76 (t, 1H,  $H_5$   $CF_3-C_6H_4$ ,  $J = 8$  Hz), 7.78 (d, 1H,  $H_6$   $CF_3-C_6H_4$ ,  $J = 8$  Hz), 7.87 (s, 1H,  $H_2$   $CF_3-C_6H_4$ );  **$^{13}C$  NMR** (100 MHz,  $DMSO-d_6$ )  $\delta$  (ppm): 80.08, 80.76, 118.14, 123.13, 125.37, 125.85, 126.98, 128.46, 129.78, 130.46, 131.01, 131.60, 132.64, 134.37, 134.96, 135.25, 138.29, 156.19, 158.33, 161.94; **MS**, m/z: 448 ( $M^+$ , 30.62); Anal. Calcd. For  $C_{20}H_9Cl_2F_3N_4O$  (448): C, 53.48; H, 2.02; N, 12.47, Found: C, 53.50; H, 2.01; N, 12.46.

**5.1.2.6. 6-Amino-2-oxo-1-(3-(trifluoromethyl)phenyl)-4-(3,4,5-trimethoxyphenyl)-1,2-dihydropyridine-3,5-dicarbonitrile (5f).** Yield 75 %; **M.P.** 195 – 197 °C; **IR** (KBr,  $cm^{-1}$ ): 3387, 3329 ( $NH_2$ ), 2210, 2191 ( $2C\equiv N$ ), 1674 ( $C=O$ ), 1643 ( $C=N$ ), 1624 ( $C=C$ );  **$^1H$  NMR** (400 MHz,  $DMSO-d_6$ )  $\delta$  (ppm): 3.77 (s, 3H, 4- $CH_3O$ -Hs), 3.85 (s, 6H, 3,5-di ( $CH_3O$ ) -

Hs), 6.84 (s, 2H, H<sub>2,6</sub> C<sub>6</sub>H<sub>2</sub>), 7.61 (d, 1H, H<sub>4</sub> CF<sub>3</sub>-C<sub>6</sub>H<sub>4</sub>, *J* = 6 Hz), 7.74 (s, 1H, H<sub>2</sub> CF<sub>3</sub>-C<sub>6</sub>H<sub>4</sub>), 7.76 – 7.78 (t, 1H, H<sub>5</sub> CF<sub>3</sub>-C<sub>6</sub>H<sub>4</sub>, *J* = 4 Hz), 7.84 (d, 1H, H<sub>6</sub> CF<sub>3</sub>-C<sub>6</sub>H<sub>4</sub>, *J* = 8 Hz); **<sup>13</sup>C NMR** (100 MHz, DMSO-*d*<sub>6</sub>)  $\delta$  (ppm): 56.74, 60.66, 78.12, 80.01, 106.17, 118.00, 118.34, 123.28, 125.73, 126.68, 130.79, 131.11, 131.68, 134.01, 137.09, 138.89, 153.25, 158.34, 160.27, 161.29; **MS**, *m/z*: 470 (M<sup>+</sup>, 43.10); Anal. Calcd. For C<sub>23</sub>H<sub>17</sub>F<sub>3</sub>N<sub>4</sub>O<sub>4</sub> (470.1): C, 58.73; H, 3.64; N, 11.91, Found: C, 58.75; H, 3.63; N, 11.90.

**5.1.3.1. 5-(4-Hydroxyphenyl)-4,7-dioxo-8-(3-(trifluoromethyl)phenyl)-3,4,7,8-tetrahydropyrido[2,3-*d*]pyrimidine-6-carbonitrile (6a).** Yield 68 %; **M.P.** 300 – 302 °C; **IR** (KBr, cm<sup>-1</sup>): 3316 (NH), 2215 (C≡N), 1676, 1656 (2C=O), 1634 (C=N), 1603 (C=C); **<sup>1</sup>H NMR** (400 MHz, DMSO-*d*<sub>6</sub>)  $\delta$  (ppm): 6.95 (d, 2H, H<sub>3,5</sub> C<sub>6</sub>H<sub>4</sub>, *J* = 8 Hz), 7.40 (d, 2H, H<sub>2,6</sub> C<sub>6</sub>H<sub>4</sub>, *J* = 8 Hz), 7.73 (d, 1H, H<sub>4</sub> CF<sub>3</sub>-C<sub>6</sub>H<sub>4</sub>, *J* = 8 Hz), 7.81 – 7.84 (t, 1H, H<sub>5</sub> CF<sub>3</sub>-C<sub>6</sub>H<sub>4</sub>, *J* = 4 Hz), 7.91 (m, 2H, H<sub>2,6</sub> CF<sub>3</sub>-C<sub>6</sub>H<sub>4</sub>), 7.99 (s, 1H, H<sub>2</sub> pyrimidine), 8.32 (s, 1H, NH; exchangeable with D<sub>2</sub>O), 10.13 (s, 1H, OH; exchangeable with D<sub>2</sub>O); **<sup>13</sup>C NMR** (100 MHz, DMSO-*d*<sub>6</sub>)  $\delta$  (ppm): 75.77, 88.09, 115.85, 116.58, 122.93, 125.33, 125.64, 126.74, 127.38, 130.35, 131.29, 131.96, 133.66, 135.36, 157.66, 159.97, 160.27, 161.94, 163.54; **MS**, *m/z*: 424 (M<sup>+</sup>, 38.61%), 425 [(M+1)<sup>+</sup>, 21.83 %], 426 [(M+2)<sup>+</sup>, 16.89 %]; Anal. Calcd. For C<sub>21</sub>H<sub>11</sub>F<sub>3</sub>N<sub>4</sub>O<sub>3</sub> (424.1): C, 59.44; H, 2.61; N, 13.20; Found: C, 59.42; H, 2.60; N, 13.21.

**5.1.3.2. 5-(4-Chlorophenyl)-4,7-dioxo-8-(3-(trifluoromethyl)phenyl)-3,4,7,8-tetrahydropyrido[2,3-*d*]pyrimidine-6-carbonitrile (6b).** Yield 75 %; **M.P.** 350 – 352 °C; **IR** (KBr, cm<sup>-1</sup>): 3330 (NH), 2217 (C≡N), 1689, 1670 (2C=O), 1623 (C=N), 1603 (C=C); **<sup>1</sup>H NMR** (400 MHz, DMSO-*d*<sub>6</sub>)  $\delta$  (ppm): 7.41 (d, 2H, H<sub>3,5</sub> C<sub>6</sub>H<sub>4</sub>, *J* = 8 Hz), 7.45 (d, 1H, H<sub>4</sub> CF<sub>3</sub>-C<sub>6</sub>H<sub>4</sub>, *J* = 8 Hz), 7.59 – 7.68 (t, 1H, H<sub>5</sub> CF<sub>3</sub>-C<sub>6</sub>H<sub>4</sub>, *J* = 4 Hz), 7.80 (d, 2H, H<sub>2,6</sub> C<sub>6</sub>H<sub>4</sub>, *J* = 8 Hz), 7.83 (d, 1H, H<sub>6</sub> CF<sub>3</sub>-C<sub>6</sub>H<sub>4</sub>, *J* = 8 Hz), 8.17 (s, H, H<sub>2</sub> CF<sub>3</sub>-C<sub>6</sub>H<sub>4</sub>), 8.33 (s, H, H<sub>2</sub> pyrimidine), 9.45 (s, 1H, NH; exchangeable with D<sub>2</sub>O); **<sup>13</sup>C NMR** (100 MHz, DMSO-*d*<sub>6</sub>)  $\delta$  (ppm): 75.91, 88.42, 116.08, 116.65, 120.21, 122.92, 125.62, 126.67, 127.45, 129.45, 130.36, 131.02, 131.98, 132.05, 133.95, 135.73, 157.66, 160.00, 160.78; **MS**, *m/z*: 442 (M<sup>+</sup>, 19.98%); Anal. Calcd. For C<sub>21</sub>H<sub>10</sub>ClF<sub>3</sub>N<sub>4</sub>O<sub>2</sub> (442.1): C, 56.97; H, 2.28; N, 12.65; Found: C, 56.99; H, 2.27; N, 12.66.

**5.1.4.1. 2-Methyl-4,7-dioxo-5-phenyl-8-(3-(trifluoromethyl)phenyl)-3,4,7,8-tetrahydropyrido[2,3-d]pyrimidine-6-carbonitrile (7a).** Yield 73 %; **M.P.** 308 - 310 °C; **IR** (KBr, cm<sup>-1</sup>): 3299 (NH), 2214 (C≡N), 1689, 1668 (2C=O), 1623 (C=N), 1610 (C=C); **<sup>1</sup>H NMR** (400 MHz, DMSO-*d*<sub>6</sub>)  $\delta$  (ppm): 1.93 (s, 3H, CH<sub>3</sub>-Hs (Pyrimidine)), 7.56 – 7.61 (m, 5 H, H<sub>2,3,4,5,6</sub> C<sub>6</sub>H<sub>5</sub>), 7.75 (d, 1H, H<sub>4</sub> CF<sub>3</sub>-C<sub>6</sub>H<sub>4</sub>, *J* = 8 Hz), 7.82 (t, 1H, H<sub>5</sub> CF<sub>3</sub>-C<sub>6</sub>H<sub>4</sub>, *J* = 4 Hz), 7.86 (s, 1H, H<sub>2</sub> CF<sub>3</sub>-C<sub>6</sub>H<sub>4</sub>), 7.92 (d, 1H, H<sub>6</sub> CF<sub>3</sub>-C<sub>6</sub>H<sub>4</sub>, *J* = 10 Hz), 8.09 (s, 1H, NH; exchangeable with D<sub>2</sub>O); **<sup>13</sup>C NMR** (100 MHz, DMSO-*d*<sub>6</sub>)  $\delta$  (ppm): 21.52, 75.98, 88.44, 116.19, 116.79, 126.69, 127.43, 127.46, 128.34, 129.24, 130.88, 131.34, 131.66, 132.04, 133.60, 135.12, 135.26, 157.66, 160.13, 162.00; **MS**, *m/z*: 422 (M<sup>+</sup>, 7.91 %); Anal. Calcd. For C<sub>22</sub>H<sub>13</sub>F<sub>3</sub>N<sub>4</sub>O<sub>2</sub> (422.1): C, 62.56; H, 3.10; N, 13.27, Found: C, 62.58; H, 3.09; N, 13.28.

**5.1.4.2. 5-(4-Chlorophenyl)-2-methyl-4,7-dioxo-8-(3-(trifluoromethyl)phenyl)-3,4,7,8-tetrahydropyrido[2,3-d]pyrimidine-6-carbonitrile (7b).** Yield 62 %; **M.P.** 330 - 332 °C; **IR** (KBr, cm<sup>-1</sup>): 3224 (NH), 2222 (C≡N), 1682, 1663 (2C=O), 1632 (C=N), 1604 (C=C); **<sup>1</sup>H NMR** (400 MHz, DMSO-*d*<sub>6</sub>)  $\delta$  (ppm): 2.19 (s, 3H, CH<sub>3</sub>-Hs (Pyrimidine)), 7.58 (d, 2 H, H<sub>2,6</sub> C<sub>6</sub>H<sub>4</sub>, *J* = 6 Hz), 7.70 (d, 2H, H<sub>3,5</sub> C<sub>6</sub>H<sub>4</sub>, *J* = 8 Hz), 7.75 (s, 1H, H<sub>2</sub> CF<sub>3</sub>-C<sub>6</sub>H<sub>4</sub>), 7.82 – 7.86 (t, 1H, H<sub>5</sub> CF<sub>3</sub>-C<sub>6</sub>H<sub>4</sub>, *J* = 6 Hz), 7.89 (d, 1H, H<sub>4</sub> CF<sub>3</sub>-C<sub>6</sub>H<sub>4</sub>, *J* = 8 Hz), 7.95 (d, 2H, H<sub>6</sub> CF<sub>3</sub>-C<sub>6</sub>H<sub>4</sub>, *J* = 8 Hz), 8.14 (s, 1H, NH; exchangeable with D<sub>2</sub>O); **<sup>13</sup>C NMR** (100 MHz, DMSO-*d*<sub>6</sub>)  $\delta$  (ppm): 22.38, 76.02, 88.38, 116.02, 116.65, 122.92, 125.63, 126.67, 127.27, 129.38, 130.27, 131.78, 133.89, 134.91, 135.89, 137.40, 157.66, 159.77, 160.89, 163.78; **MS**, *m/z*: 456 (M<sup>+</sup>, 34.11 %); Anal. Calcd. For C<sub>22</sub>H<sub>12</sub>ClF<sub>3</sub>N<sub>4</sub>O<sub>2</sub> (456.1): C, 57.85; H, 2.65; N, 12.27, Found: C, 57.87; H, 2.65; N, 12.26.

**5.1.4.3. 5-(2,4-Dichlorophenyl)-2-methyl-4,7-dioxo-8-(3-(trifluoromethyl)phenyl)-3,4,7,8-tetrahydropyrido[2,3-d]pyrimidine-6-carbonitrile (7c).** Yield 90 %; **M.P.** 333 - 335 °C; **IR** (KBr, cm<sup>-1</sup>): 3202 (NH), 2226 (C≡N), 1682 (2C=O), 1625 (C=N), 1601 (C=C); **<sup>1</sup>H NMR** (400 MHz, DMSO-*d*<sub>6</sub>)  $\delta$  (ppm): 2.20 (s, 3H, CH<sub>3</sub>-Hs (Pyrimidine)), 7.50 (d, 1H, H<sub>4</sub> CF<sub>3</sub>-C<sub>6</sub>H<sub>4</sub>), 7.57 (d, 1H, H<sub>6</sub> CF<sub>3</sub>-C<sub>6</sub>H<sub>4</sub>), 7.70- 7.90 (m, 3H, H<sub>5,6</sub> C<sub>6</sub>H<sub>3</sub>, H<sub>5</sub> CF<sub>3</sub>-C<sub>6</sub>H<sub>4</sub>), 7.93 (s, 1H, H<sub>3</sub> C<sub>6</sub>H<sub>3</sub>), 7.94 (s, 1H, H<sub>2</sub> CF<sub>3</sub>-C<sub>6</sub>H<sub>4</sub>), 12.88 (s, 1H, NH; exchangeable with D<sub>2</sub>O); **<sup>13</sup>C NMR** (100 MHz, DMSO-*d*<sub>6</sub>)  $\delta$  (ppm): 22.44, 76.49, 89.13, 115.32, 115.98, 126.52, 127.56, 128.17, 128.82, 130.03, 130.76, 131.51, 132.39, 134.73,

135.09, 156.48, 158.79, 159.75, 164.11, 164.23; **MS**, m/z: 490 ( $M^+$ , 14.97 %); Anal. Calcd. For  $C_{22}H_{11}Cl_2F_3N_4O_2$  (490): C, 53.79; H, 2.26; N, 11.41, Found: C, 53.80; H, 2.27; N, 11.40.

**5.1.4.4. 4-(6-Cyano-2-methyl-4,7-dioxo-8-(3-(trifluoromethyl)phenyl)-3,4,7,8-tetrahydropyrido[2,3-d]pyrimidin-5-yl)phenyl acetate (7d).** Yield 67 %; **M.P.** 320 - 322 °C; **IR** (KBr,  $cm^{-1}$ ): 3206 (NH), 2225 ( $C\equiv N$ ), 1773, 1686 ( $3C=O$ ), 1622 ( $C=N$ ), 1593 ( $C=C$ );  **$^1H$  NMR** (400 MHz,  $DMSO-d_6$ )  $\delta$  (ppm): 2.18 (s, 3H,  $CH_3CO$ ), 2.34 (s, 3H,  $CH_3$ -Hs (Pyrimidine)), 7.27 (d, 2H,  $H_{2,6} C_6H_4$ ,  $J = 8$  Hz), 7.39 (d, 1H,  $H_{3,5} C_6H_4$ ,  $J = 8$  Hz), 7.42 (d, 1H,  $H_4 CF_3-C_6H_4$ ,  $J = 7$  Hz), 7.69 (d, 1H,  $H_6 CF_3-C_6H_4$ ,  $J = 8$  Hz), 7.79 – 7.94 (m, 1H,  $H_{2,5} CF_3-C_6H_4$ ), 12.77 (s, 1H, NH; exchangeable with  $D_2O$ );  **$^{13}C$  NMR** (100 MHz,  $DMSO-d_6$ )  $\delta$  (ppm): 21.45, 22.34, 101.45, 103.74, 115.56, 121.82, 125.93, 125.97, 126.26, 128.97, 130.06, 130.75, 133.56, 133.85, 137.57, 151.29, 157.56, 158.88, 159.87, 160.04, 163.71, 169.45 ; **MS**, m/z: 480 ( $M^+$ , 27.20 %); Anal. Calcd. For  $C_{24}H_{15}F_3N_4O_4$  (480): C, 60.00; H, 3.15; N, 11.66; Found: C, 59.98; H, 3.14; N, 11.65.

**5.1.4.5. 2-Methyl-4,7-dioxo-8-(3-(trifluoromethyl)phenyl)-5-(3,4,5-trimethoxyphenyl)-3,4,7,8-tetrahydropyrido[2,3-d]pyrimidine-6-carbonitrile (7e).** Yield 89 %; **M.P.** 150 - 152 °C; **IR** (KBr,  $cm^{-1}$ ): 3209 (NH), 2224 ( $C\equiv N$ ), 1674 ( $2C=O$ ), 1630 ( $C=N$ ), 1589 ( $C=C$ );  **$^1H$  NMR** (400 MHz,  $DMSO-d_6$ )  $\delta$  (ppm): 2.19 (s, 3H,  $CH_3$ -Hs (Pyrimidine)), 3.77 (s, 3H, 4- $CH_3O$ -H), 3.86 (s, 6H, 3,5-di ( $CH_3O$ ) - Hs), 6.87 (s, 2H,  $H_{2,6} C_6H_2$ ), 7.66 (d, 1H,  $H_4 CF_3-C_6H_4$ ,  $J = 8$  Hz), 7.80 (s, 1H,  $H_2 CF_3-C_6H_4$ ), 7.81 (d, 1H,  $H_6 CF_3-C_6H_4$ ,  $J = 7$  Hz), 7.88 – 7.90 (t, 1H,  $H_5 CF_3-C_6H_4$ ,  $J = 6$  Hz); 12.66 (s, 1H, NH; exchangeable with  $D_2O$ );  **$^{13}C$  NMR** (100 MHz,  $DMSO-d_6$ )  $\delta$  (ppm): 22.32, 56.49, 56.62, 60.51, 75.85, 88.28, 101.52, 103.74, 106.06, 115.49, 130.94, 131.92, 133.41, 137.51, 138.18, 139.30, 152.81, 157.32, 158.41, 159.92, 161.41, 162.01, 163.61; **MS**, m/z: 512 ( $M^+$ , 34.33 %); Anal. Calcd. For  $C_{25}H_{19}F_3N_4O_5$  (512.1): C, 58.60; H, 3.74; N, 10.93; Found: C, 58.62; H, 3.74; N, 10.94.

## **2. Cell viability assay**

The MTT assay was used to determine the effects of the newly synthesized compounds on cell viability [49-51]. In a nutshell,  $1 \times 10^4$  cells/well were seeded in a 96-well plate and allowed to grow for 24 hours. After 24 hours, the original medium was discarded, and a new compounds-containing medium was added. After 48 hours, the media was changed out and 100  $\mu$ L of MTT (10  $\mu$ L from (MTT) stock solution (5 mg/ml in PBS) in 100  $\mu$ L media) was added to each well, and the plates were incubated at 37° C for 4 hours. After adding 100  $\mu$ L of acidified isopropanol to each well, the formed formazan crystals were dissolved, and the absorbance was read at 570 nm using an ELISA microplate reader (Epoc-2C micro-plate reader, Bio Tek, VT, USA). There were three separate runs of every experiment. Half-maximal inhibitory concentrations (IC<sub>50</sub>) were determined by fitting sigmoidal dose-response curves.

## **3. Statistical Analysis**

GraphPad Prism 8.0 (San Diego, CA, USA) analyzed all results. All results (three independent experiments) were shown as means  $\pm$  standard deviation. The significance of the differences in the outcomes of all groups was examined using ANOVA and Tukey's multiple comparisons tests. Statistical significance was defined as a  $p < 0.05$

## **4. Molecular dynamics**

In this work, six molecular dynamic simulations (MDS) were conducted for 150000ps using GROMACS 5.1.1 software. The two free enzymes and the retrieved docking coordinates of the same enzymes bound compound 5e, TAK-285 and Sorafenib were used as input structures for the molecular dynamics. The receptor and ligand topologies were generated by PDB2gmx (embedded in GROMACS) and GlycoBioChem PRODRG2 Server respectively, both under GROMOS96 force field was implemented to generate the ligand topologies using the. After rejoining ligands and receptor topologies to generate six systems, the typical molecular dynamics scheme of GROMACS was applied for all the systems. This include, solvation, neutralization, energy minimization under GROMOS96 43a1 force field and two stages of equilibration (NVT and NPT).

Finally, unrestricted production stage of 150ns was applied for the six systems with particle mesh ewald (PME) method implemented to compute the long-range electrostatic values using 12 Å cut-off and 12 Å Fourier spacing. The stability of the complexes was judged using RMSD and RMSF values calculated from the MDS trajectories from the production step.

### **MMPBSA calculations**

The following equation was implemented to calculate the binding free energies:

$$\Delta G_{\text{(Binding)}} = G_{\text{(Complex)}} - G_{\text{(Receptor)}} - G_{\text{(Ligand)}}$$

Where  $G_{\text{(Complex)}}$  is the total free energy of the protein–ligand complex and  $G_{\text{(Receptor)}}$  and  $G_{\text{(Ligand)}}$  are the total free energies of the isolated protein and ligand in solvent, respectively. The total free energy of any of the three mentioned entities (complex, receptor and ligand) were calculated for all MD trajectories from its molecular mechanics potential energy plus the energy of the solvation, using the `g_mmpbsa` package implemented in the GROMACS software. Individual energies along with the values of standard deviations were calculated and then summed together to yield the average total free energy of each component. Finally, to calculate the binding-free energy, the total free energy of the receptor and the ligand were subtracted from the total free energy of the complex.



Mona Hussein-A10c-AS-proton  
Mona Hussein-A10c-AS-proton

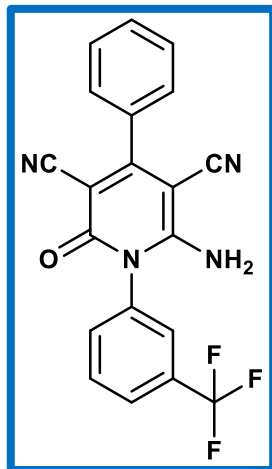

5a

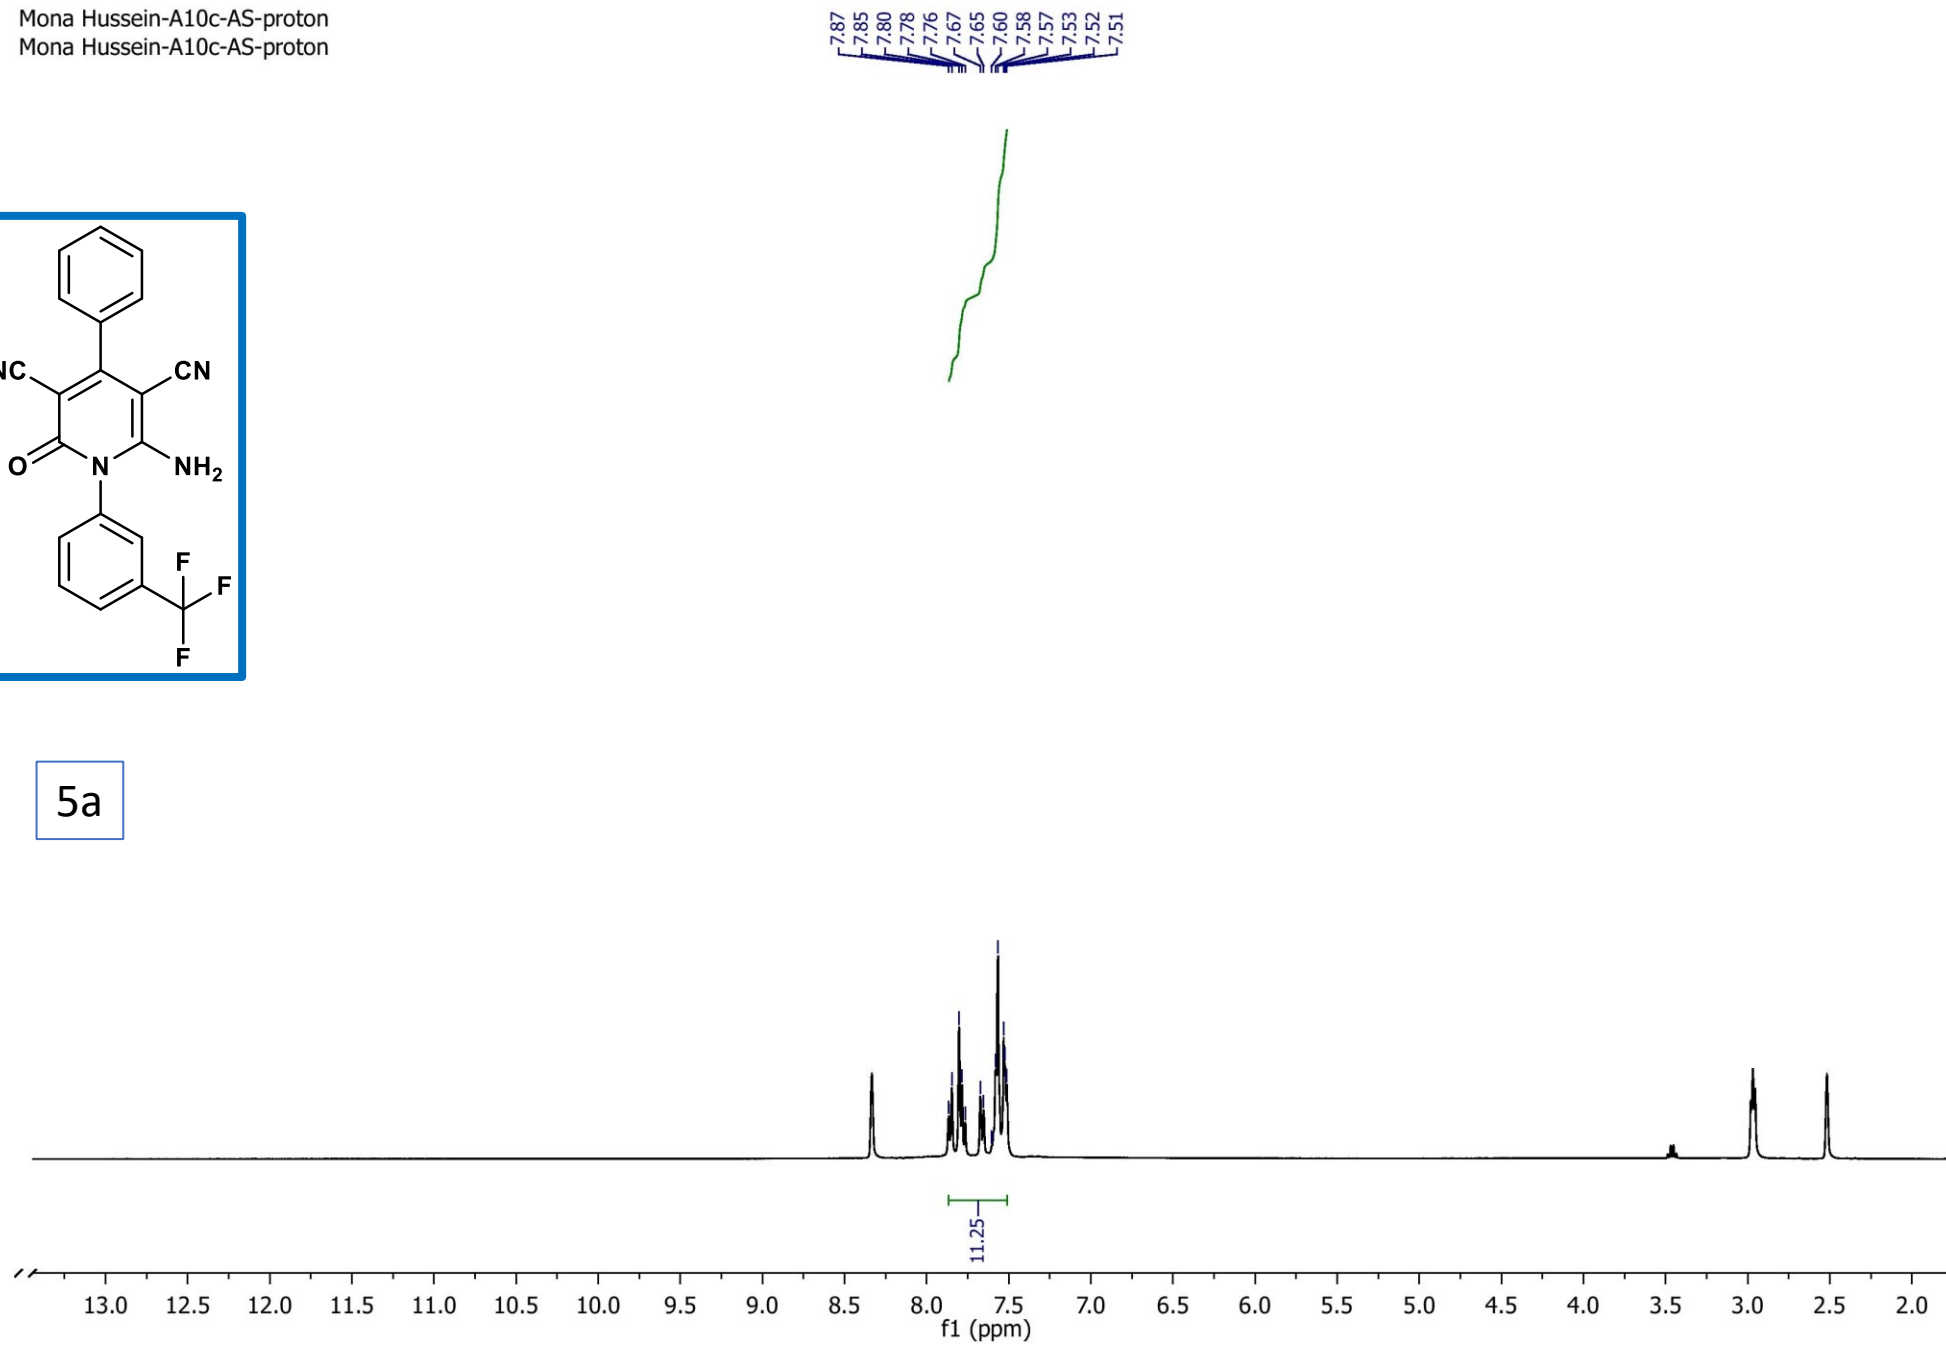

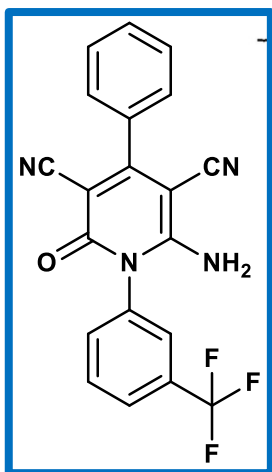

5a

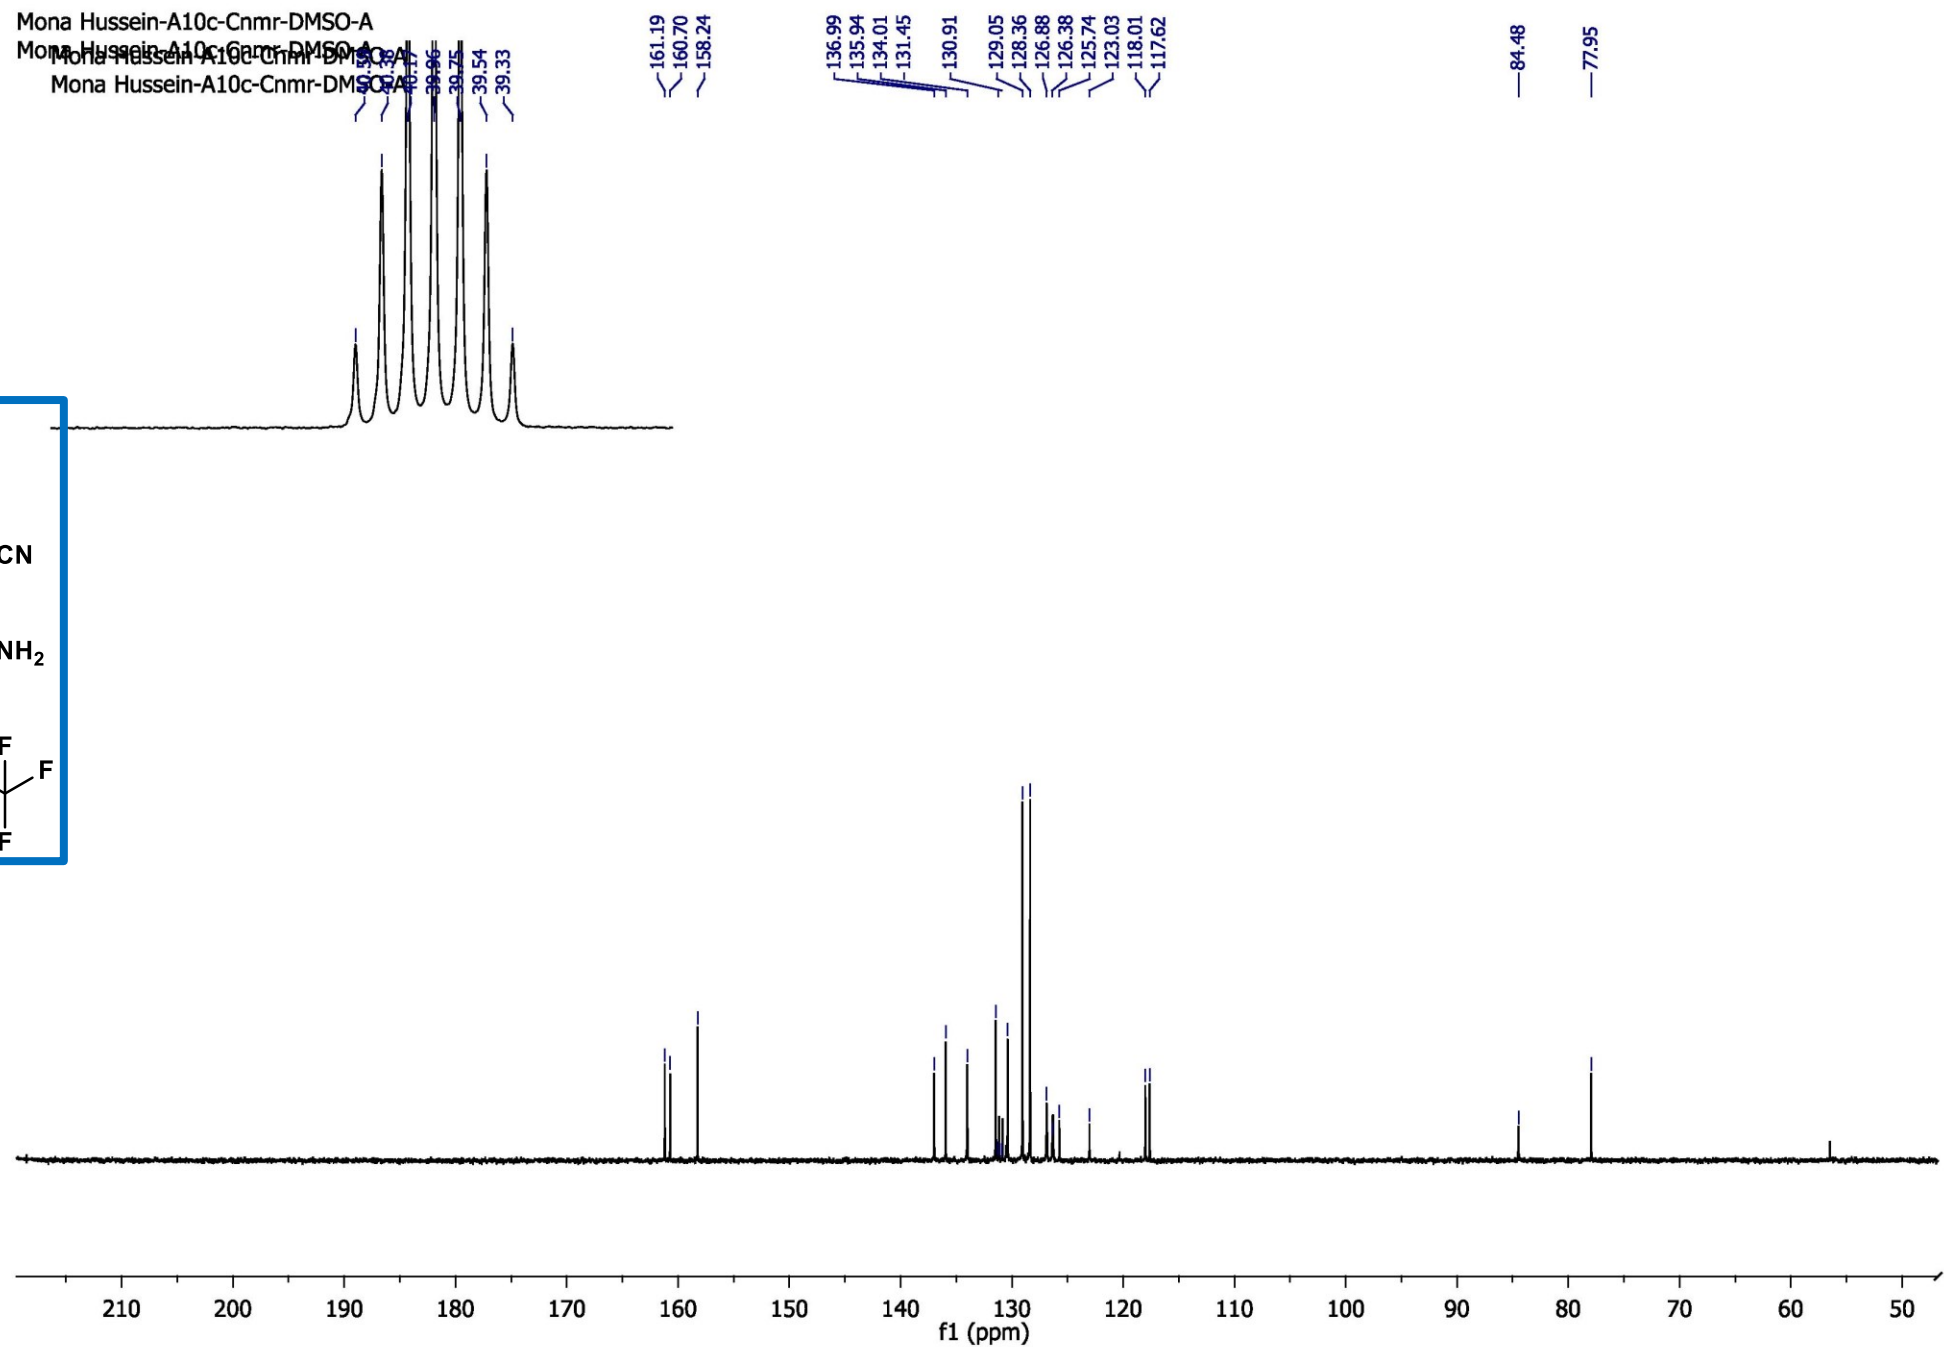

Mona Hussein-A11c-AS-proton  
Mona Hussein-A11c-AS-proton

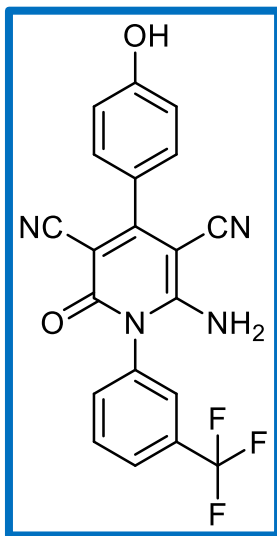

5b

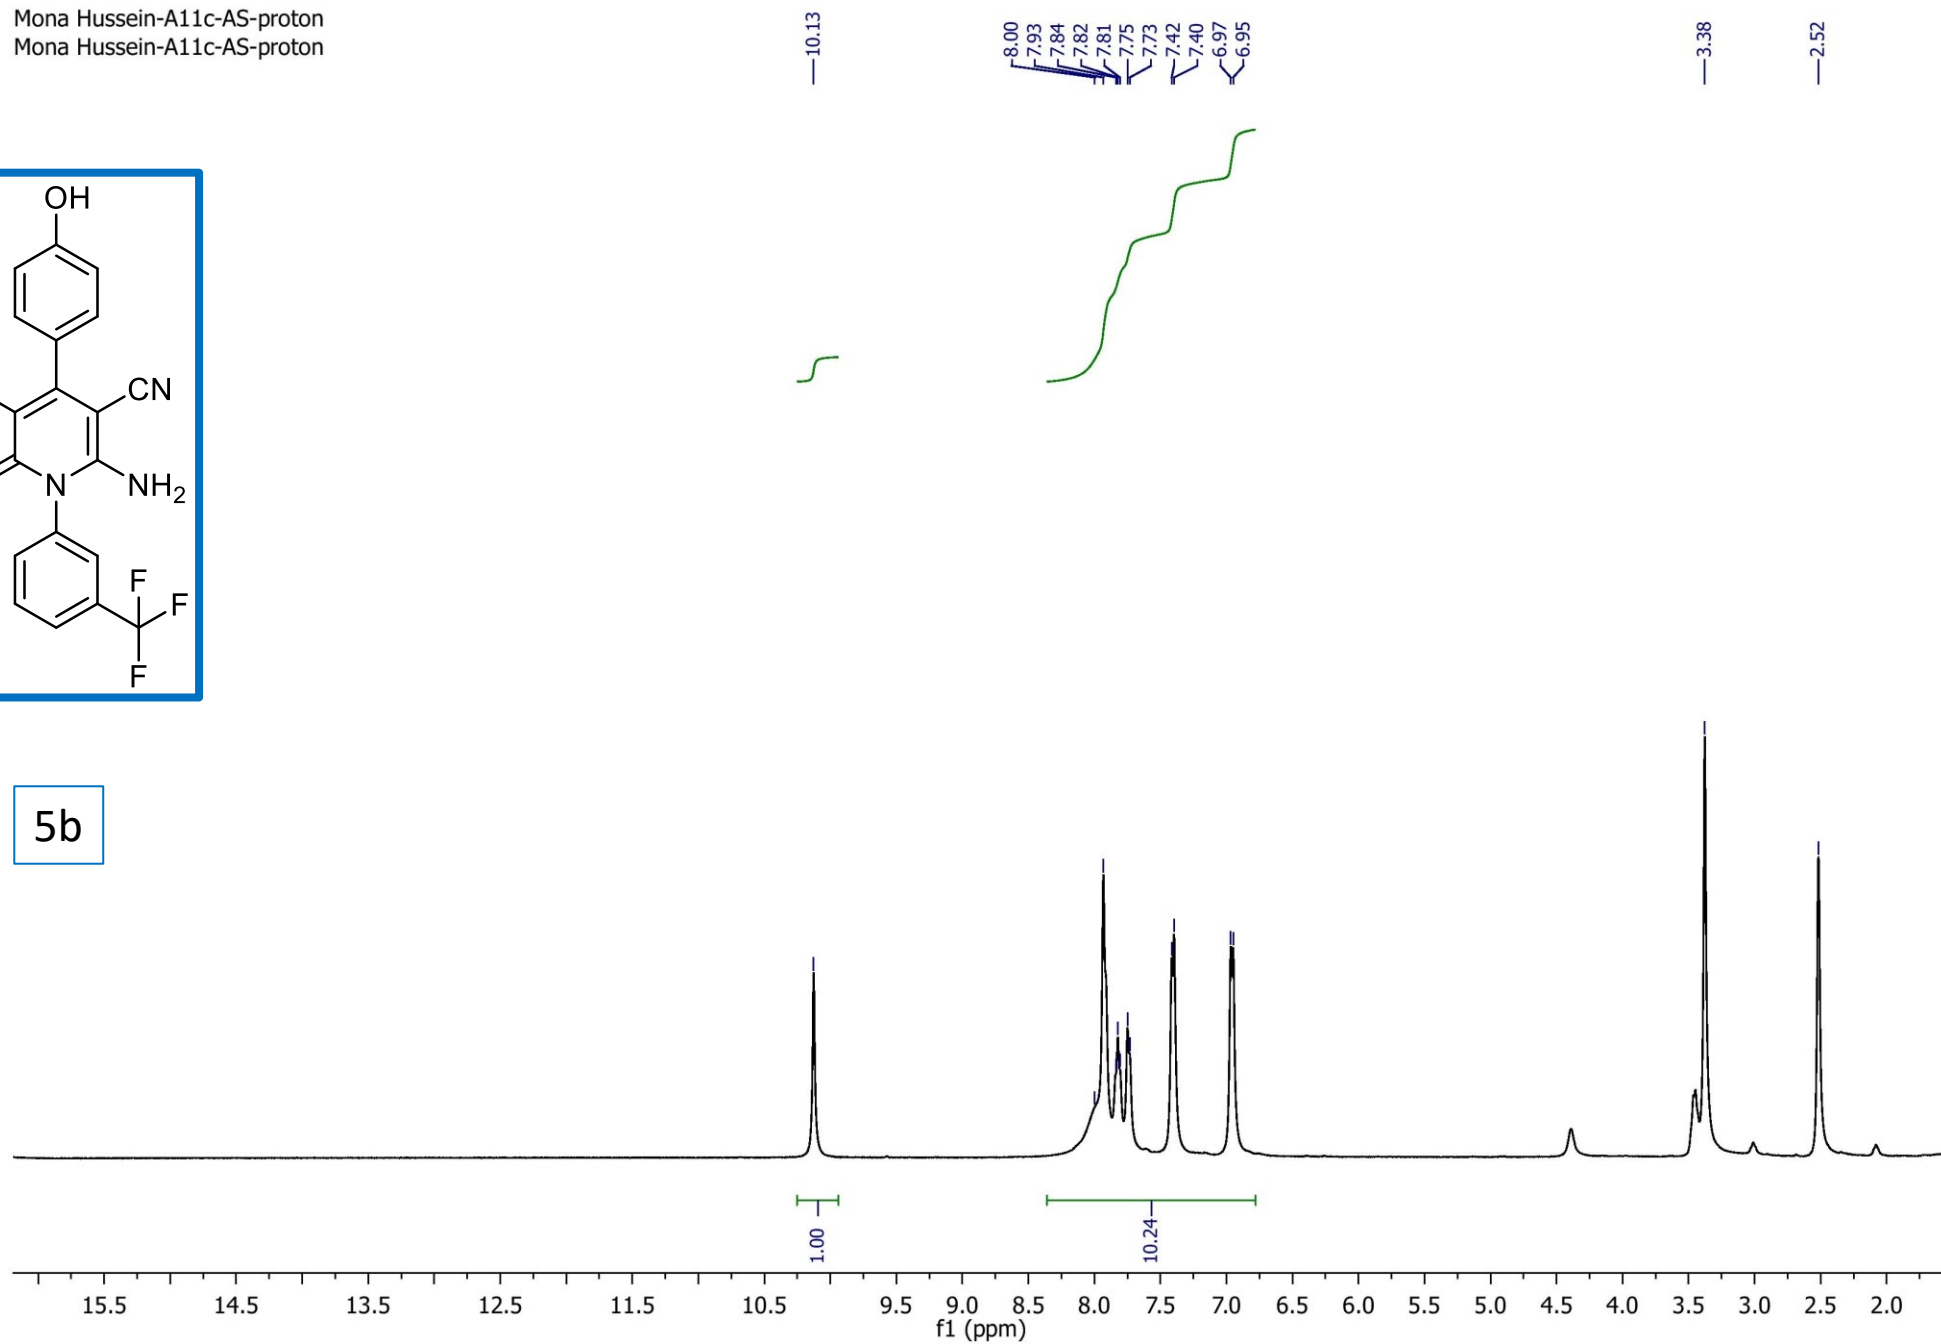

Mona Hussin-A11C-D2O-AF  
Mona Hussin-A11C-D2O-AF

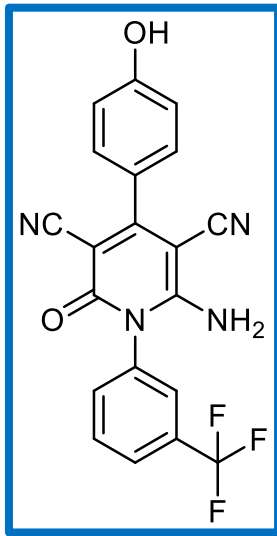

5b

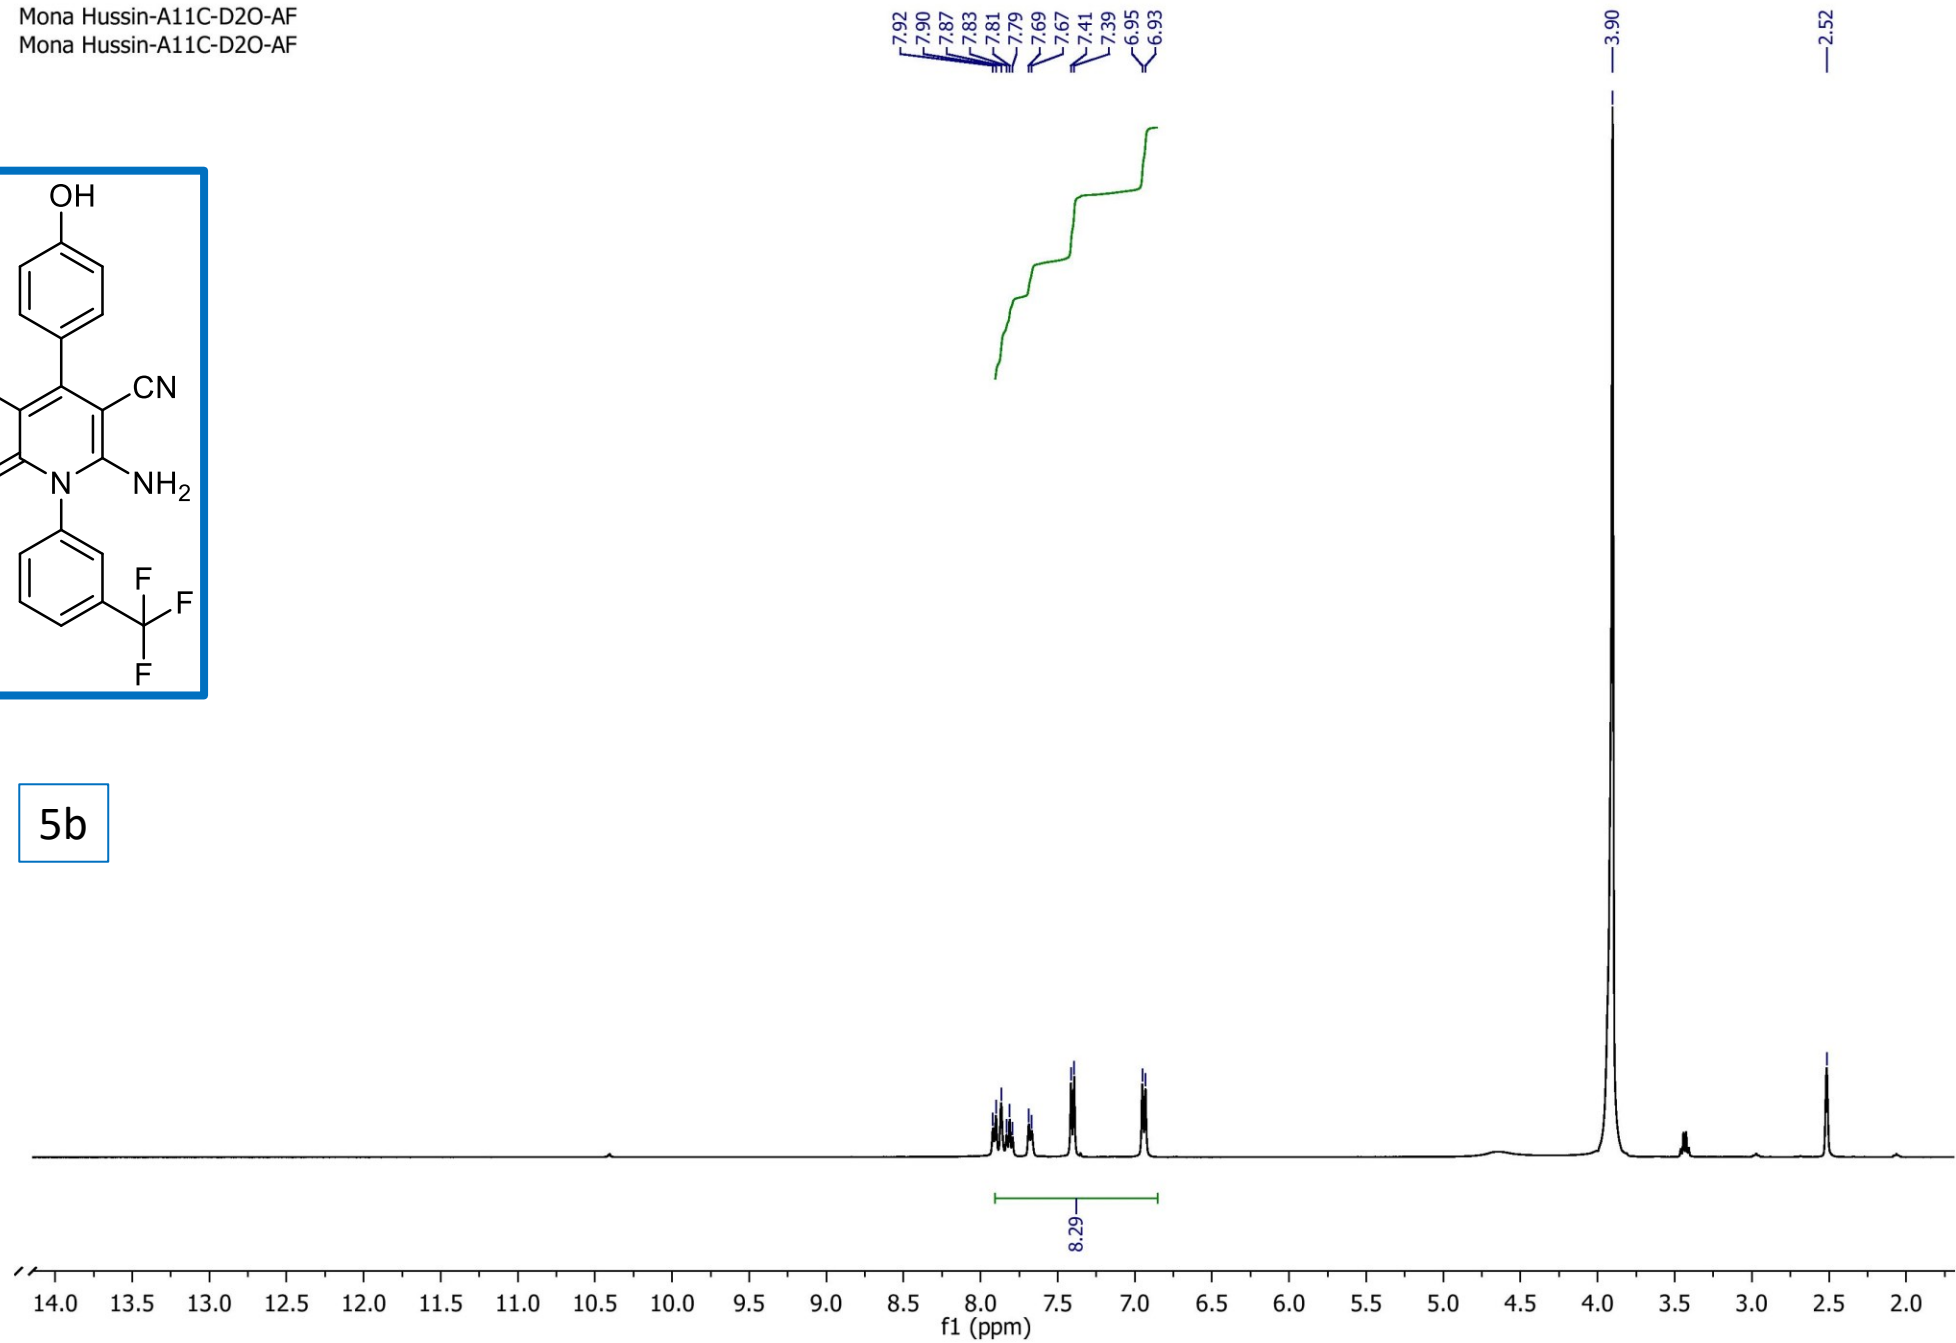

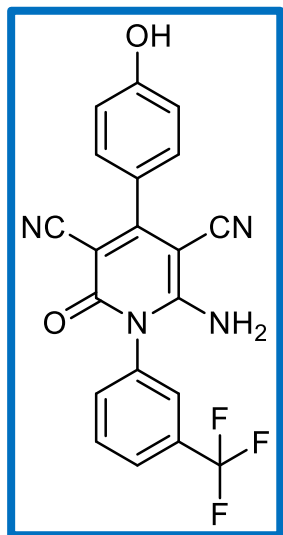

5b

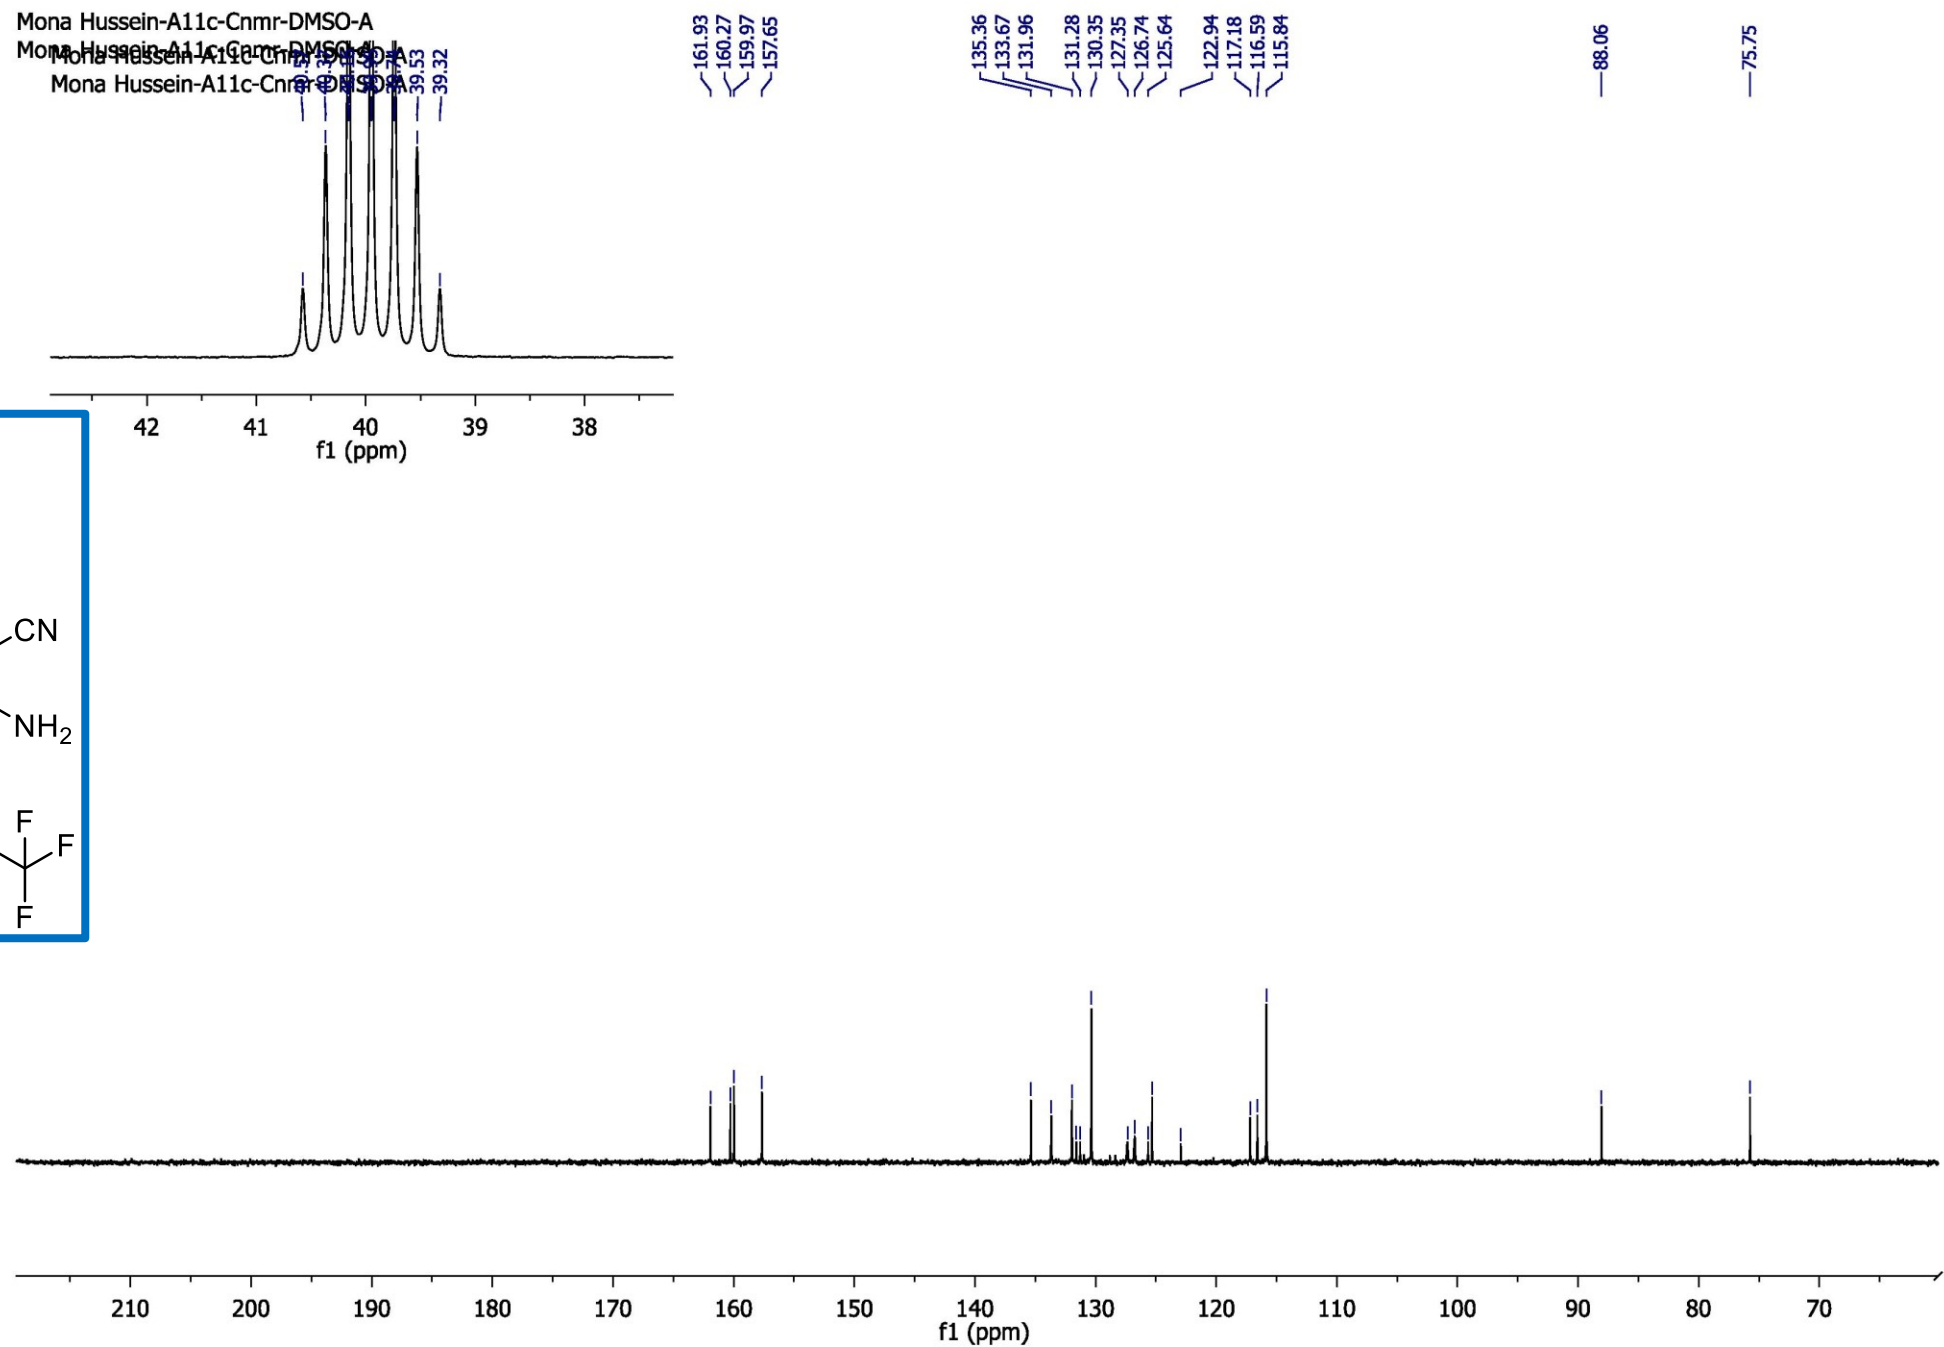

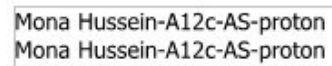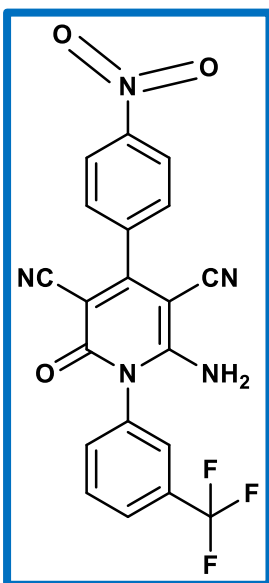

5c

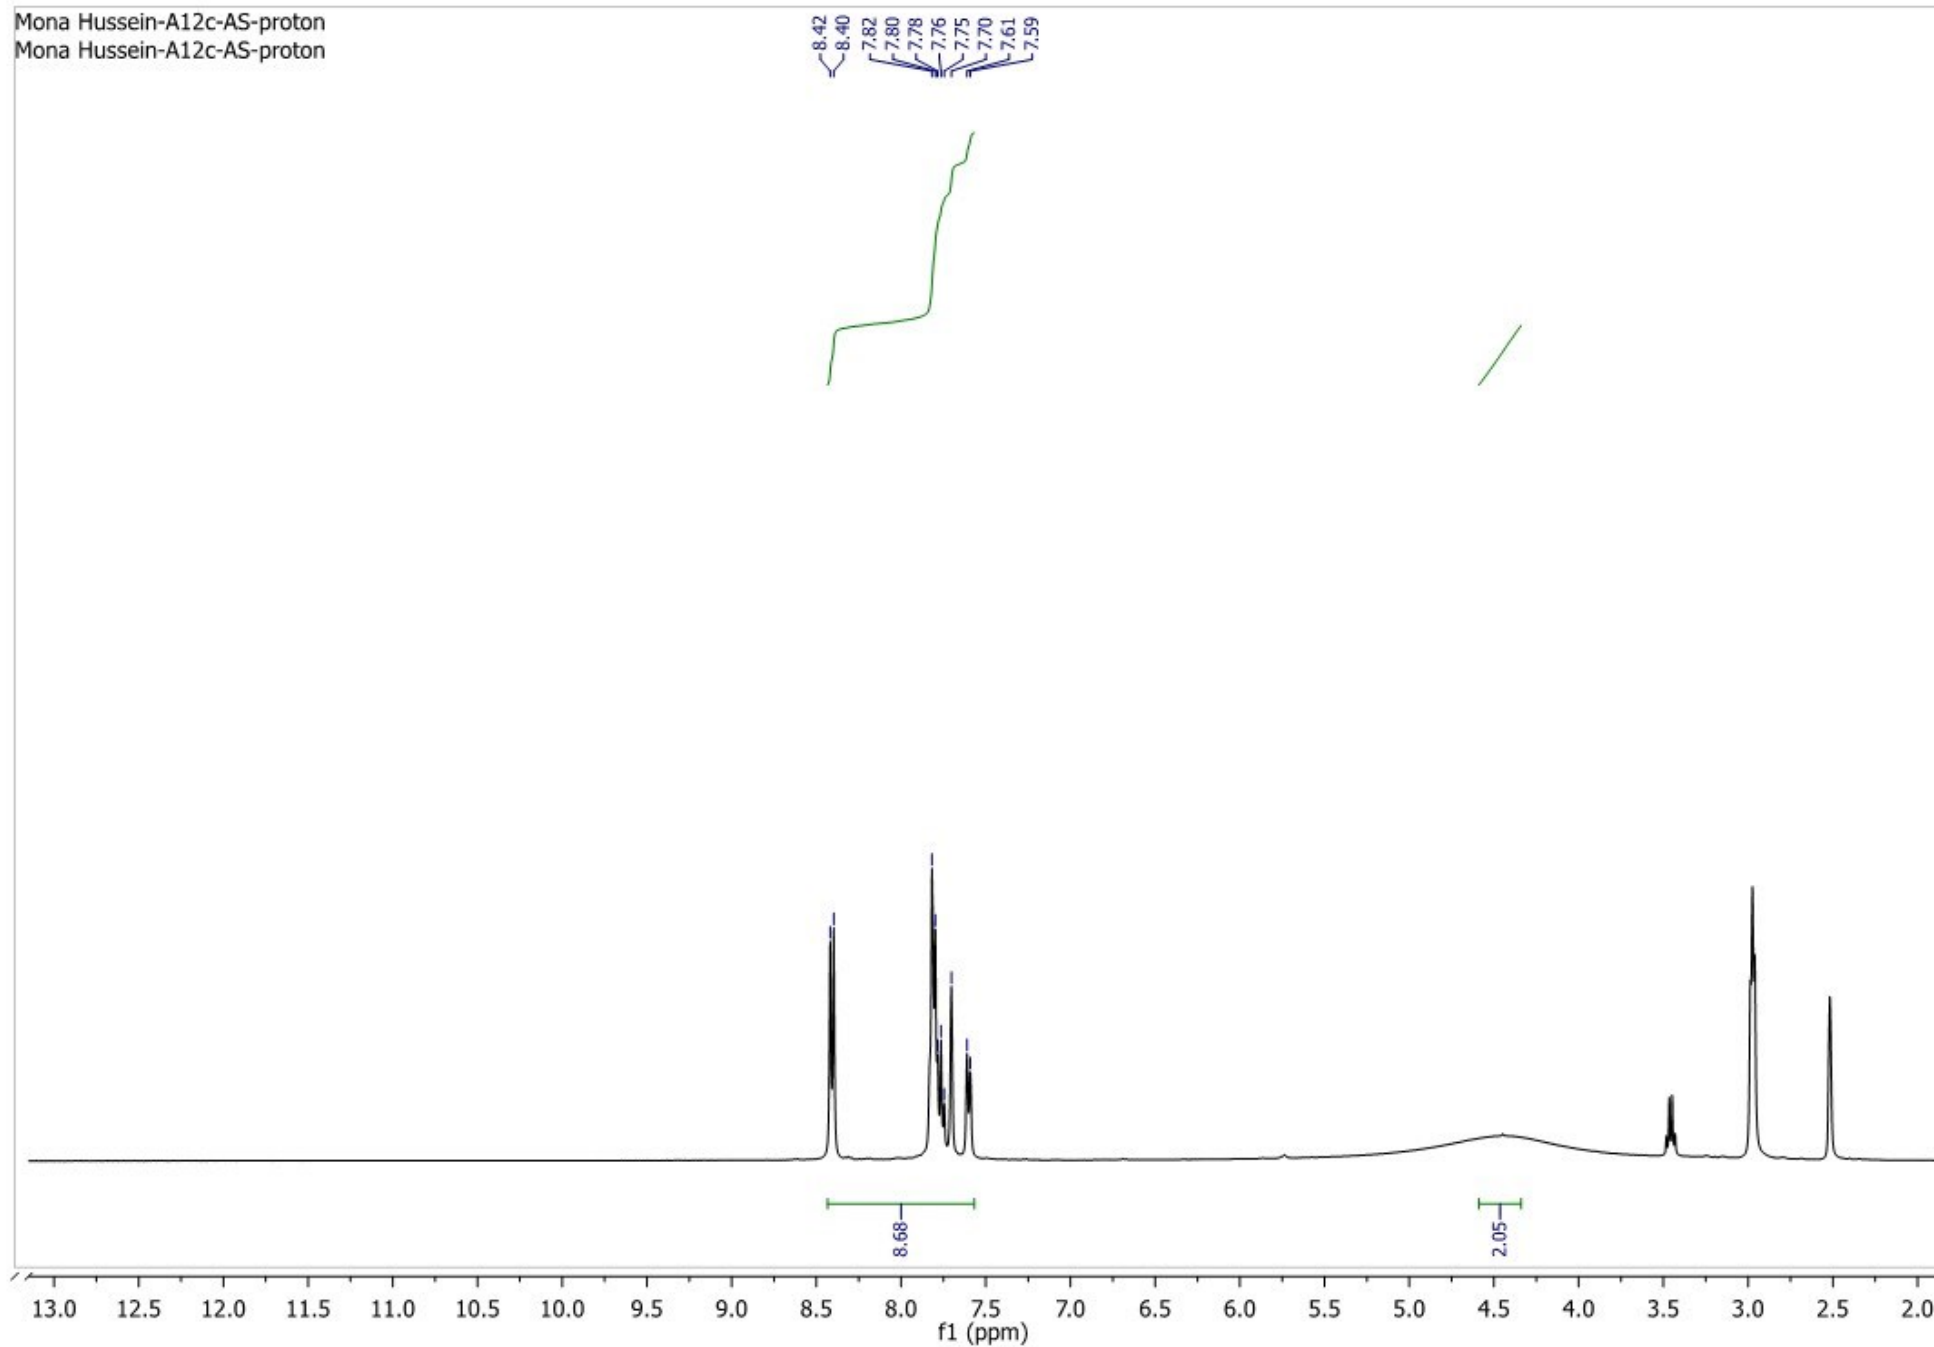

Mona Hussein-A12c-Cnmr-DMSO-A  
Mona Hussein-A12c-Cnmr-DMSO-A  
Mona Hussein-A12c-Cnmr-DMSO-A  
Mona Hussein-A12c-Cnmr-DMSO-A

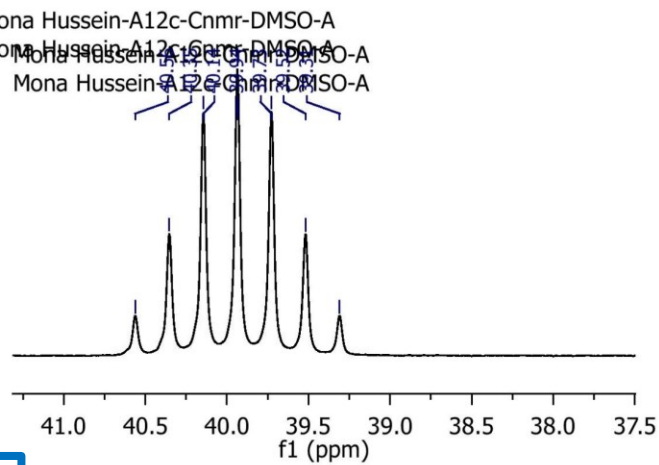

161.61  
158.26  
157.88

148.58

137.81  
134.19  
131.21  
130.94  
130.12  
126.90  
126.86  
125.76  
124.27  
123.95  
118.46  
118.07

81.62  
79.18

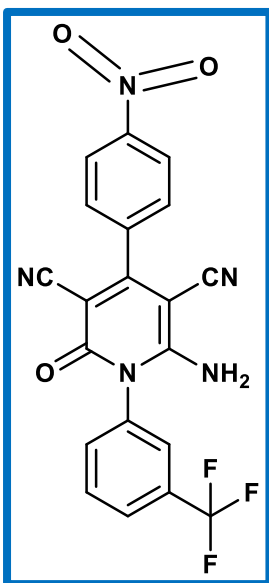

5c

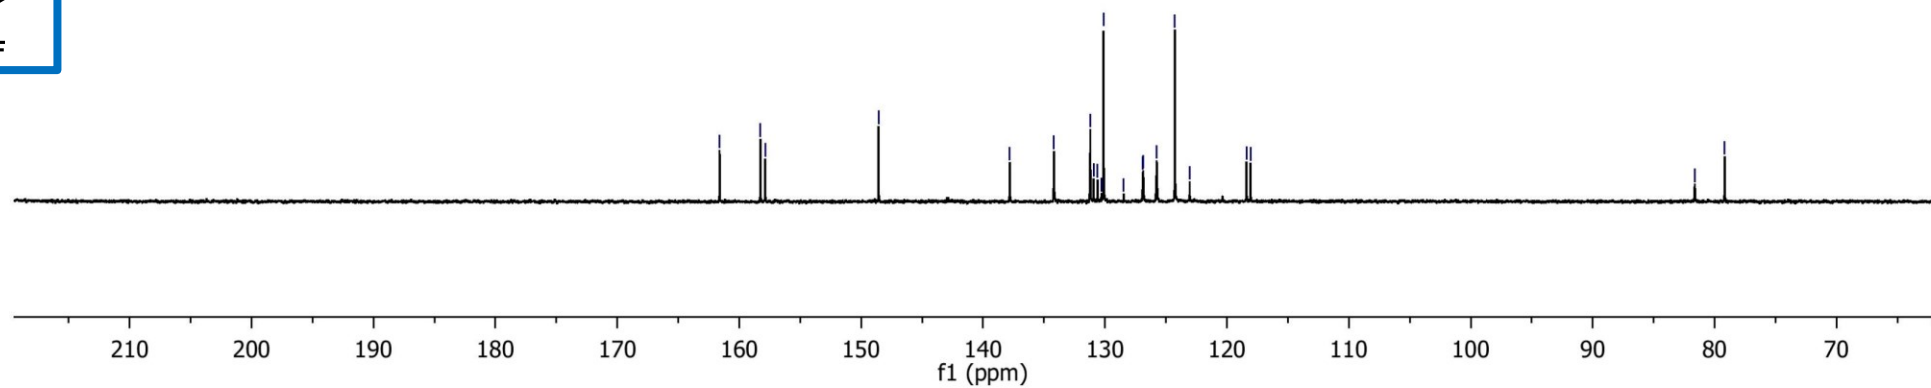

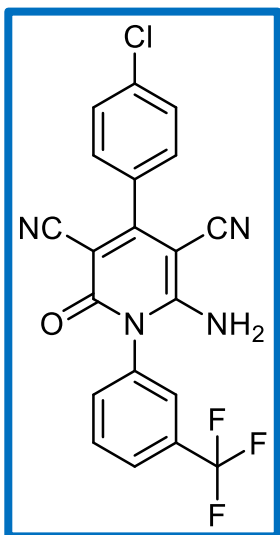

5d

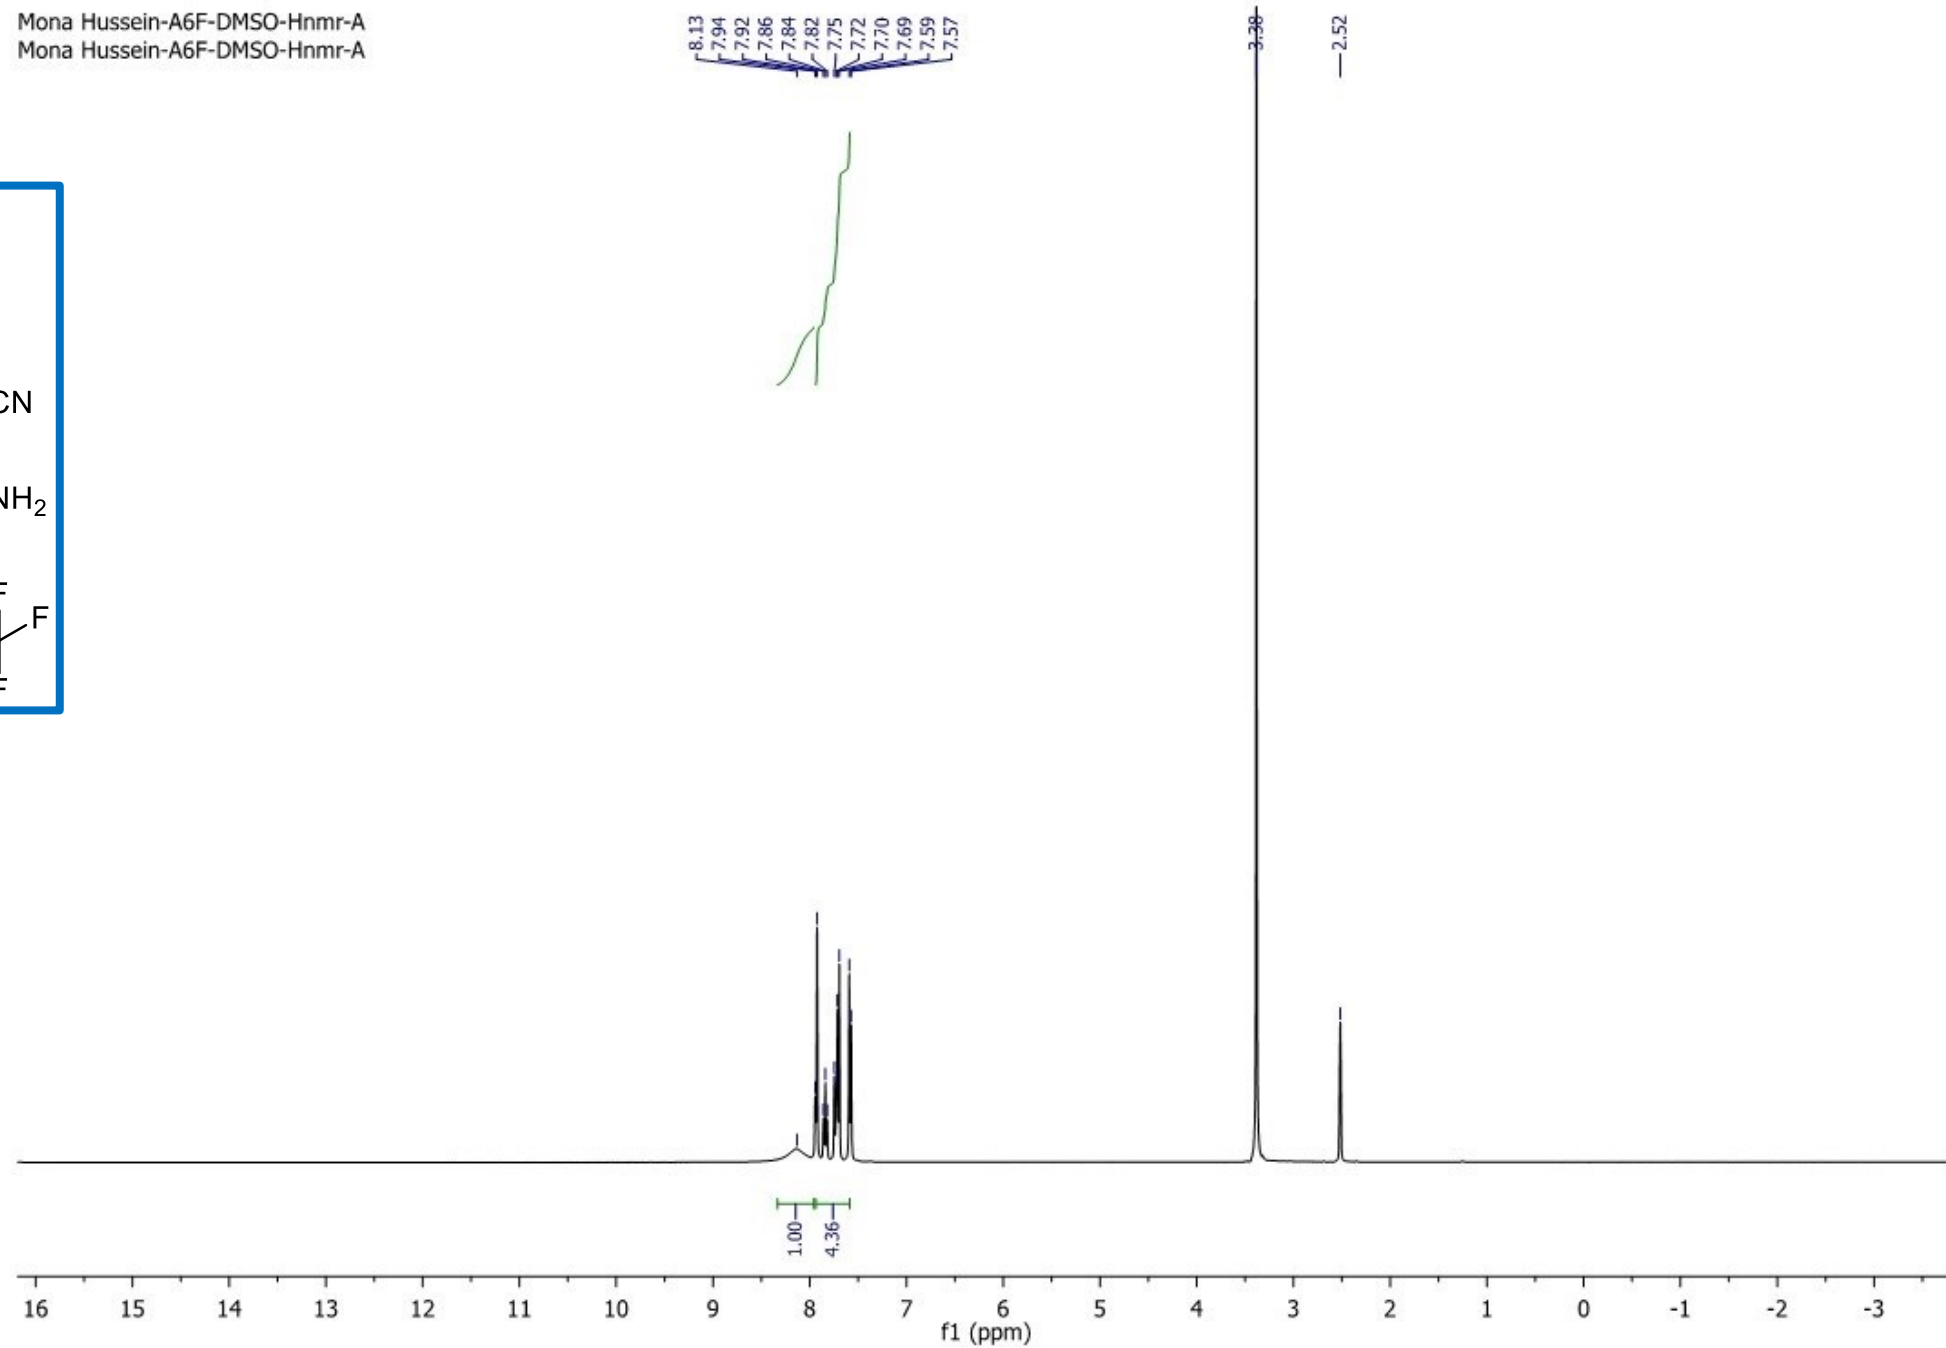



mona hussain -A6F-carbon-WH  
mona hussain -A6F-carbon-WH

161.41  
158.88  
156.37  
150.95  
150.78  
147.56  
138.73  
137.89  
133.71  
133.07  
130.39  
127.74  
126.57  
125.89  
123.05  
120.70  
102.54  
94.40

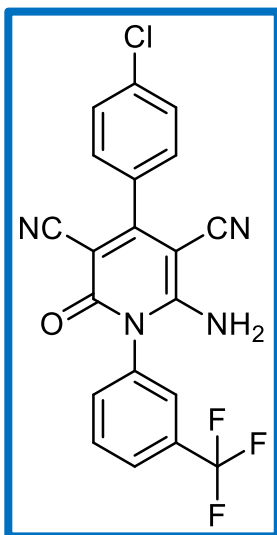

5d

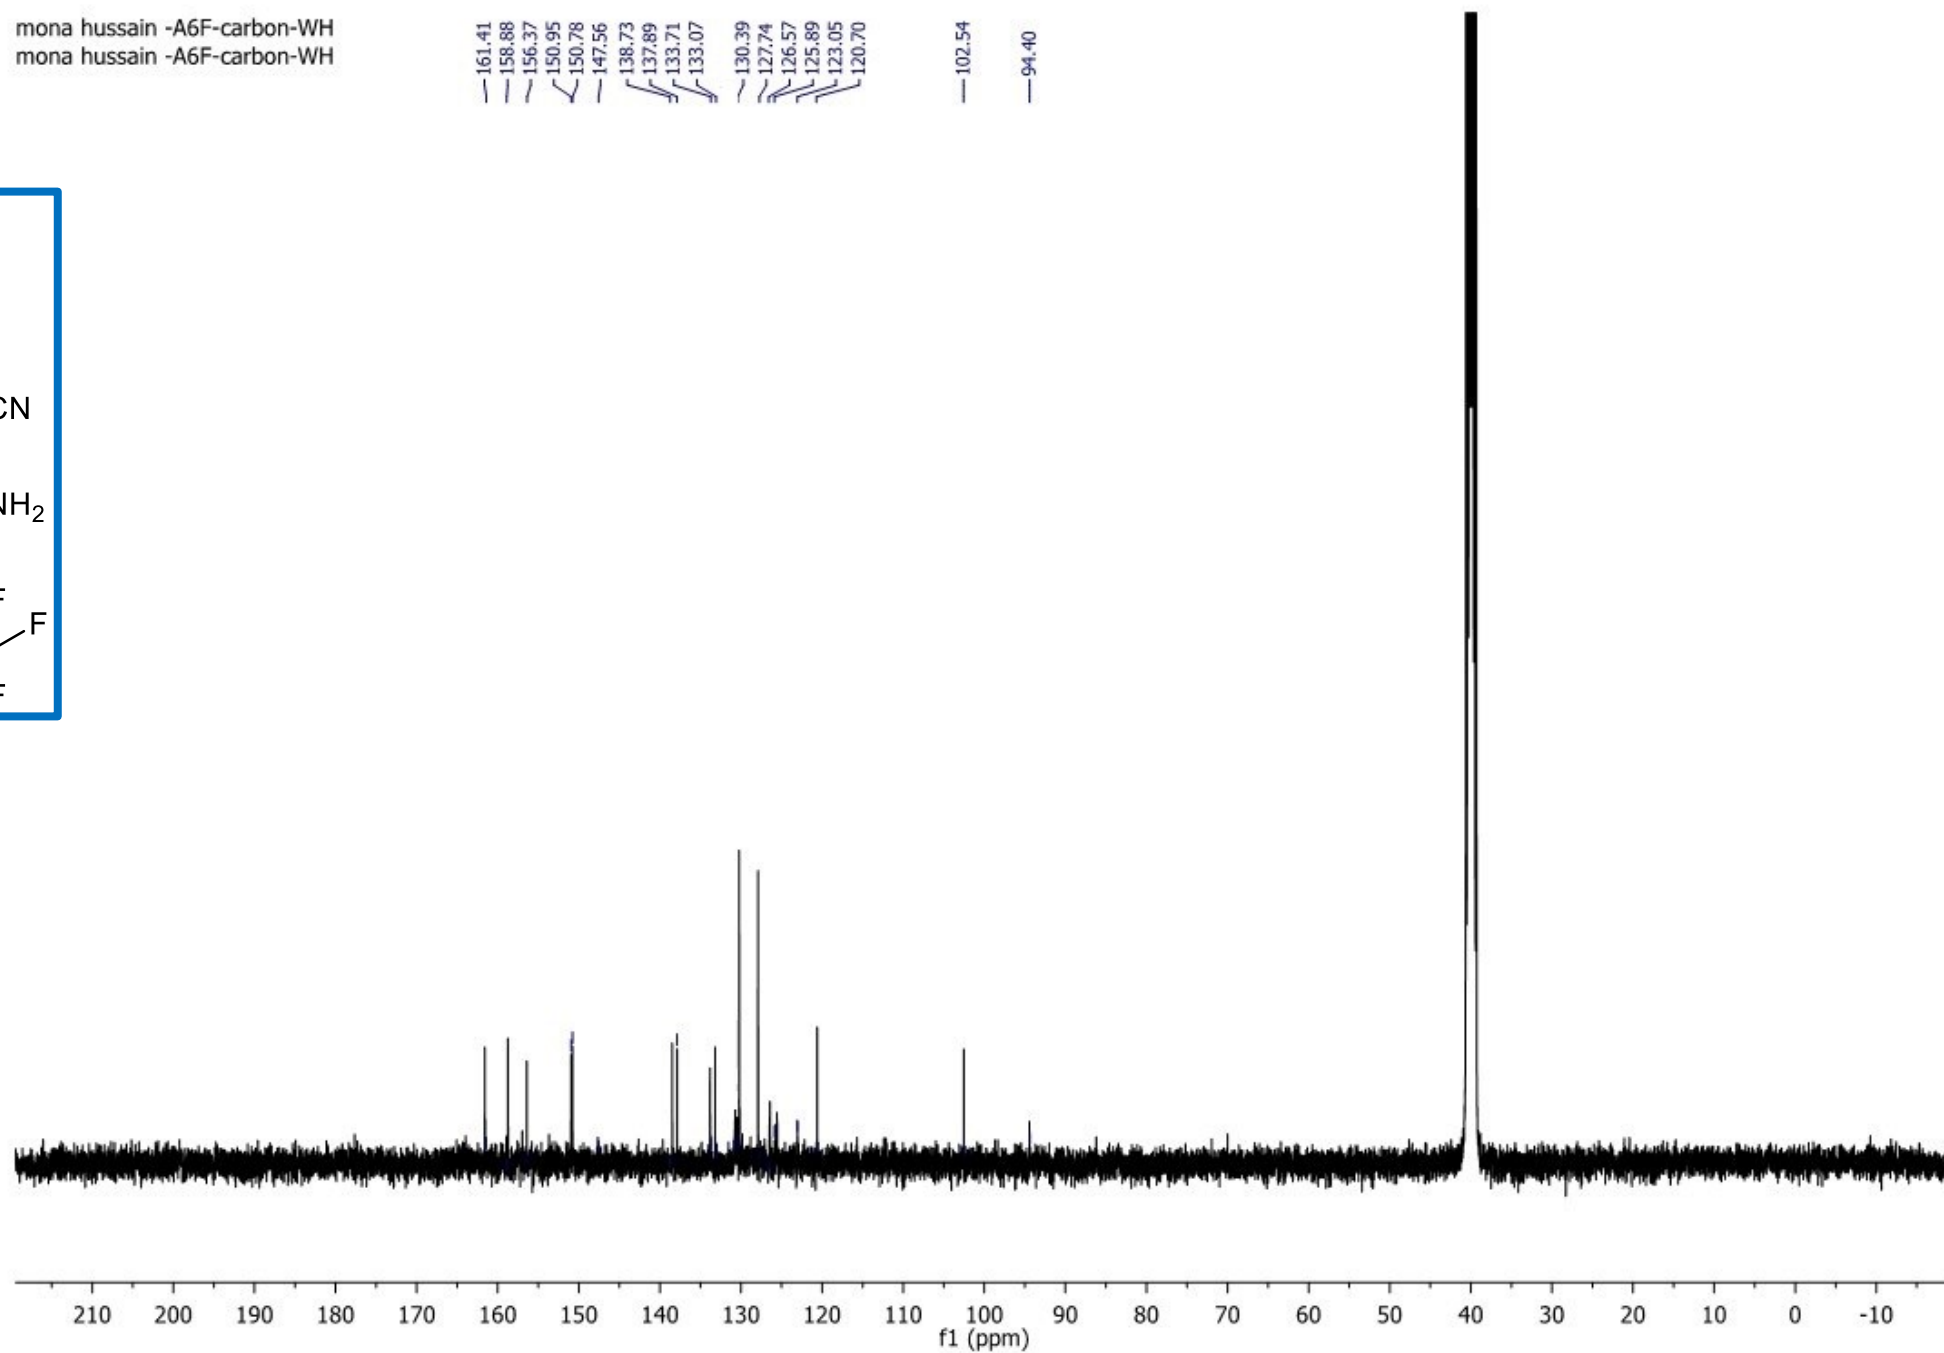

Mona Hussein-A7c-AS-proton  
Mona Hussein-A7c-AS-proton

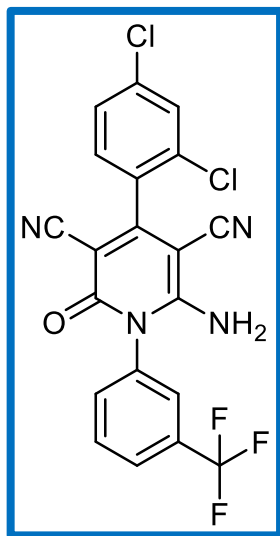

5e

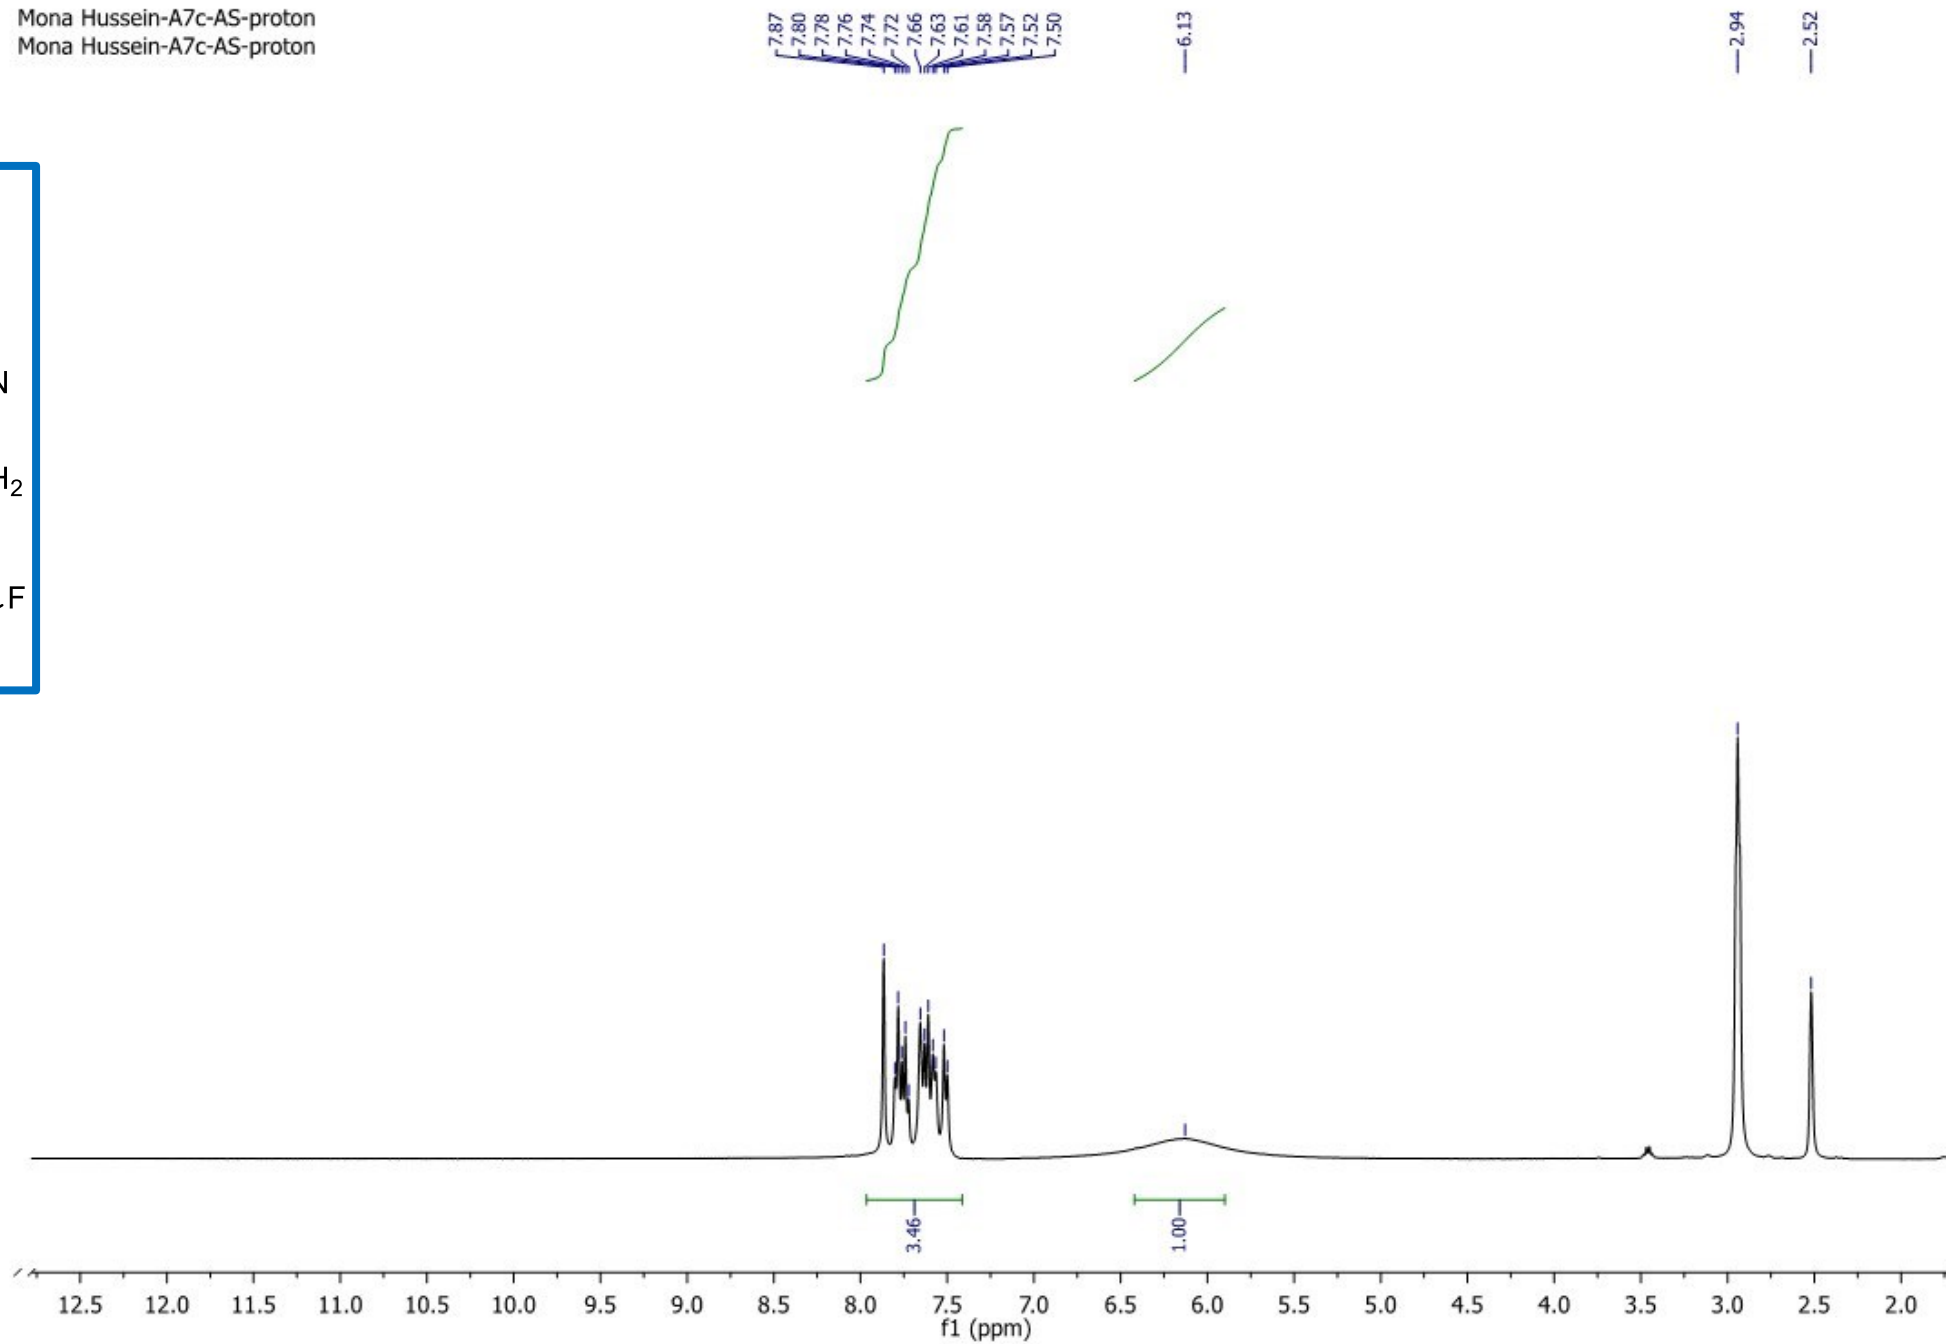

Mona Hussein-A9c-AS-proton  
Mona Hussein-A9c-AS-proton

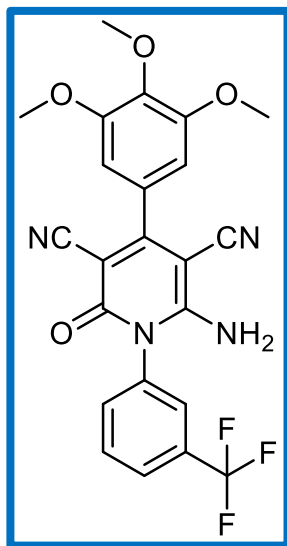

5f

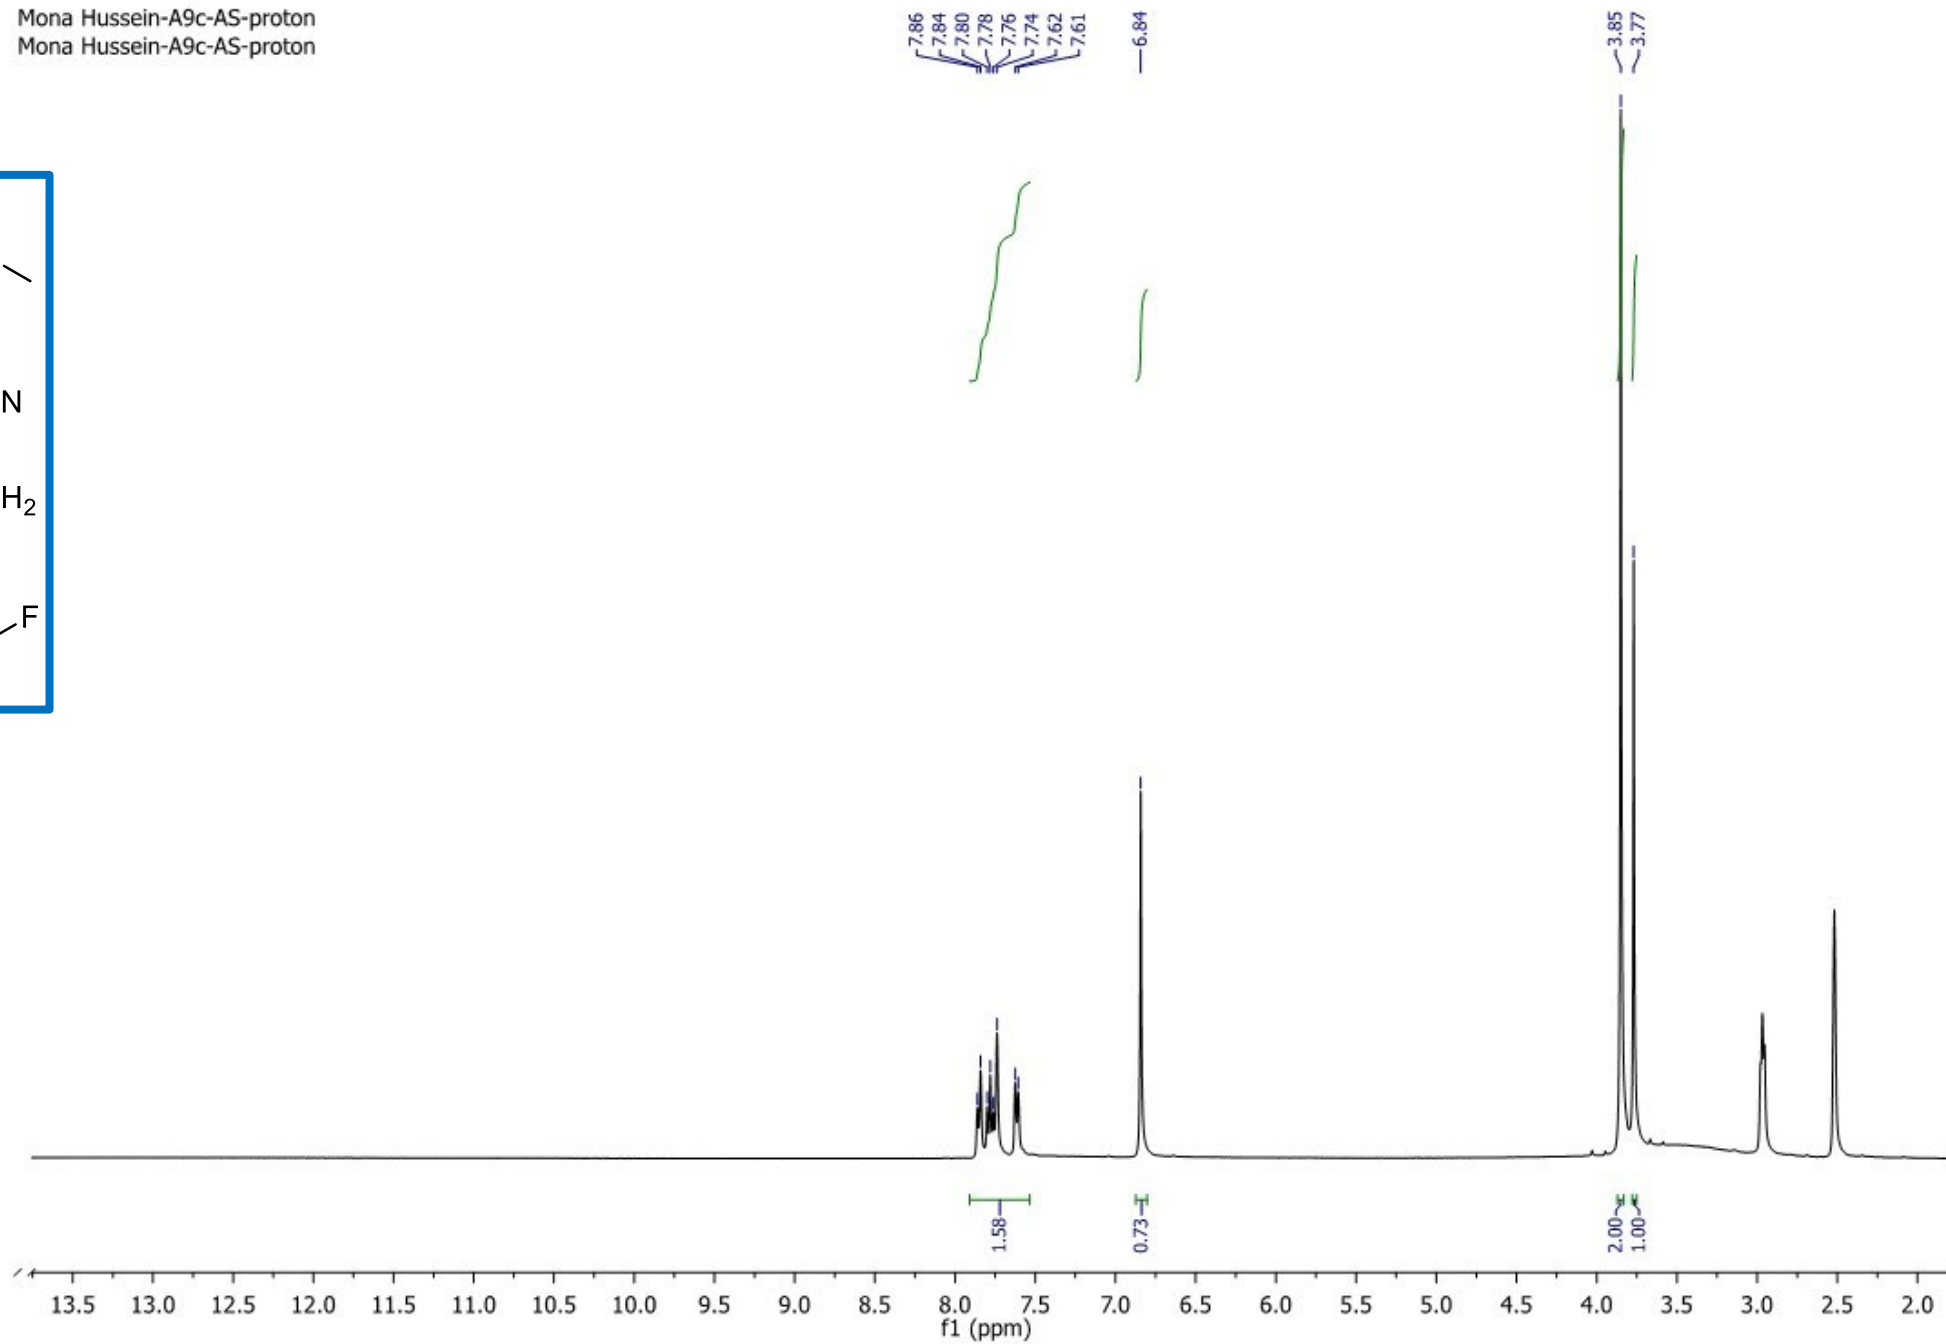

Mona Hussein-A9c-Cnmr-DMSO-A  
Mona Hussein-A9c-Cnmr-DMSO-A

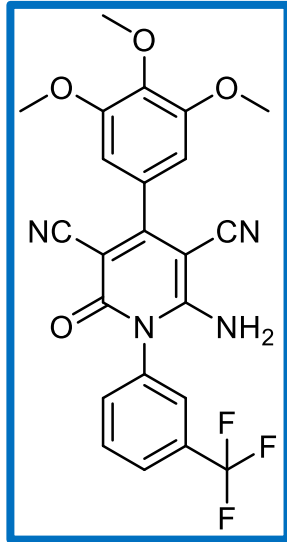

5f

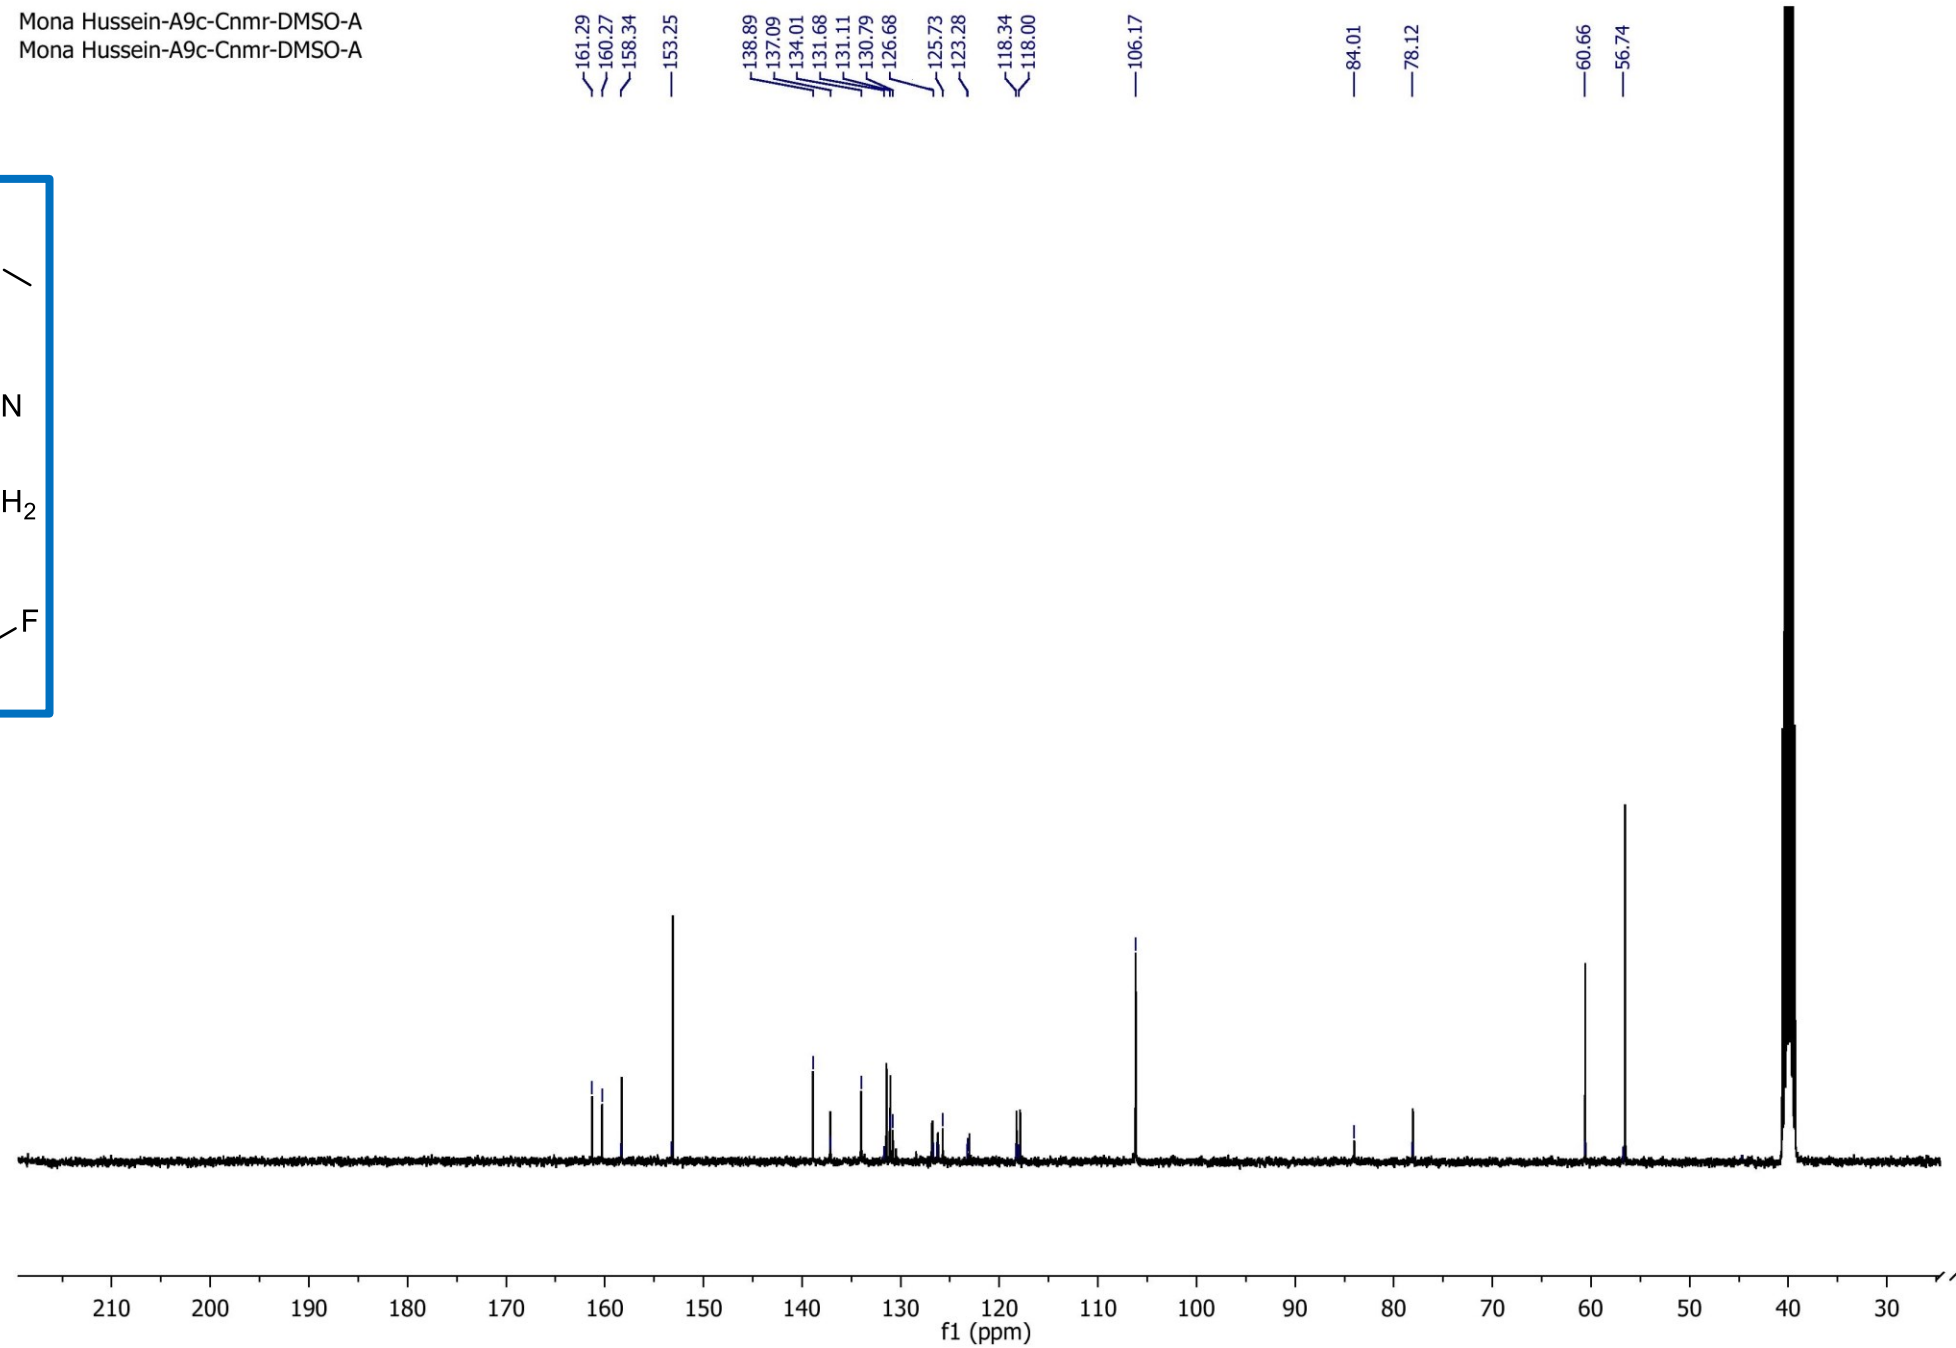

Mona Hussein-AF11-DMSO-Hnmr-A

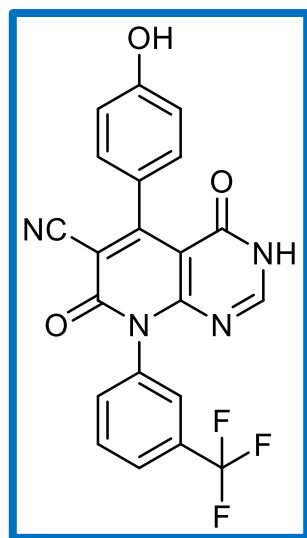

6a

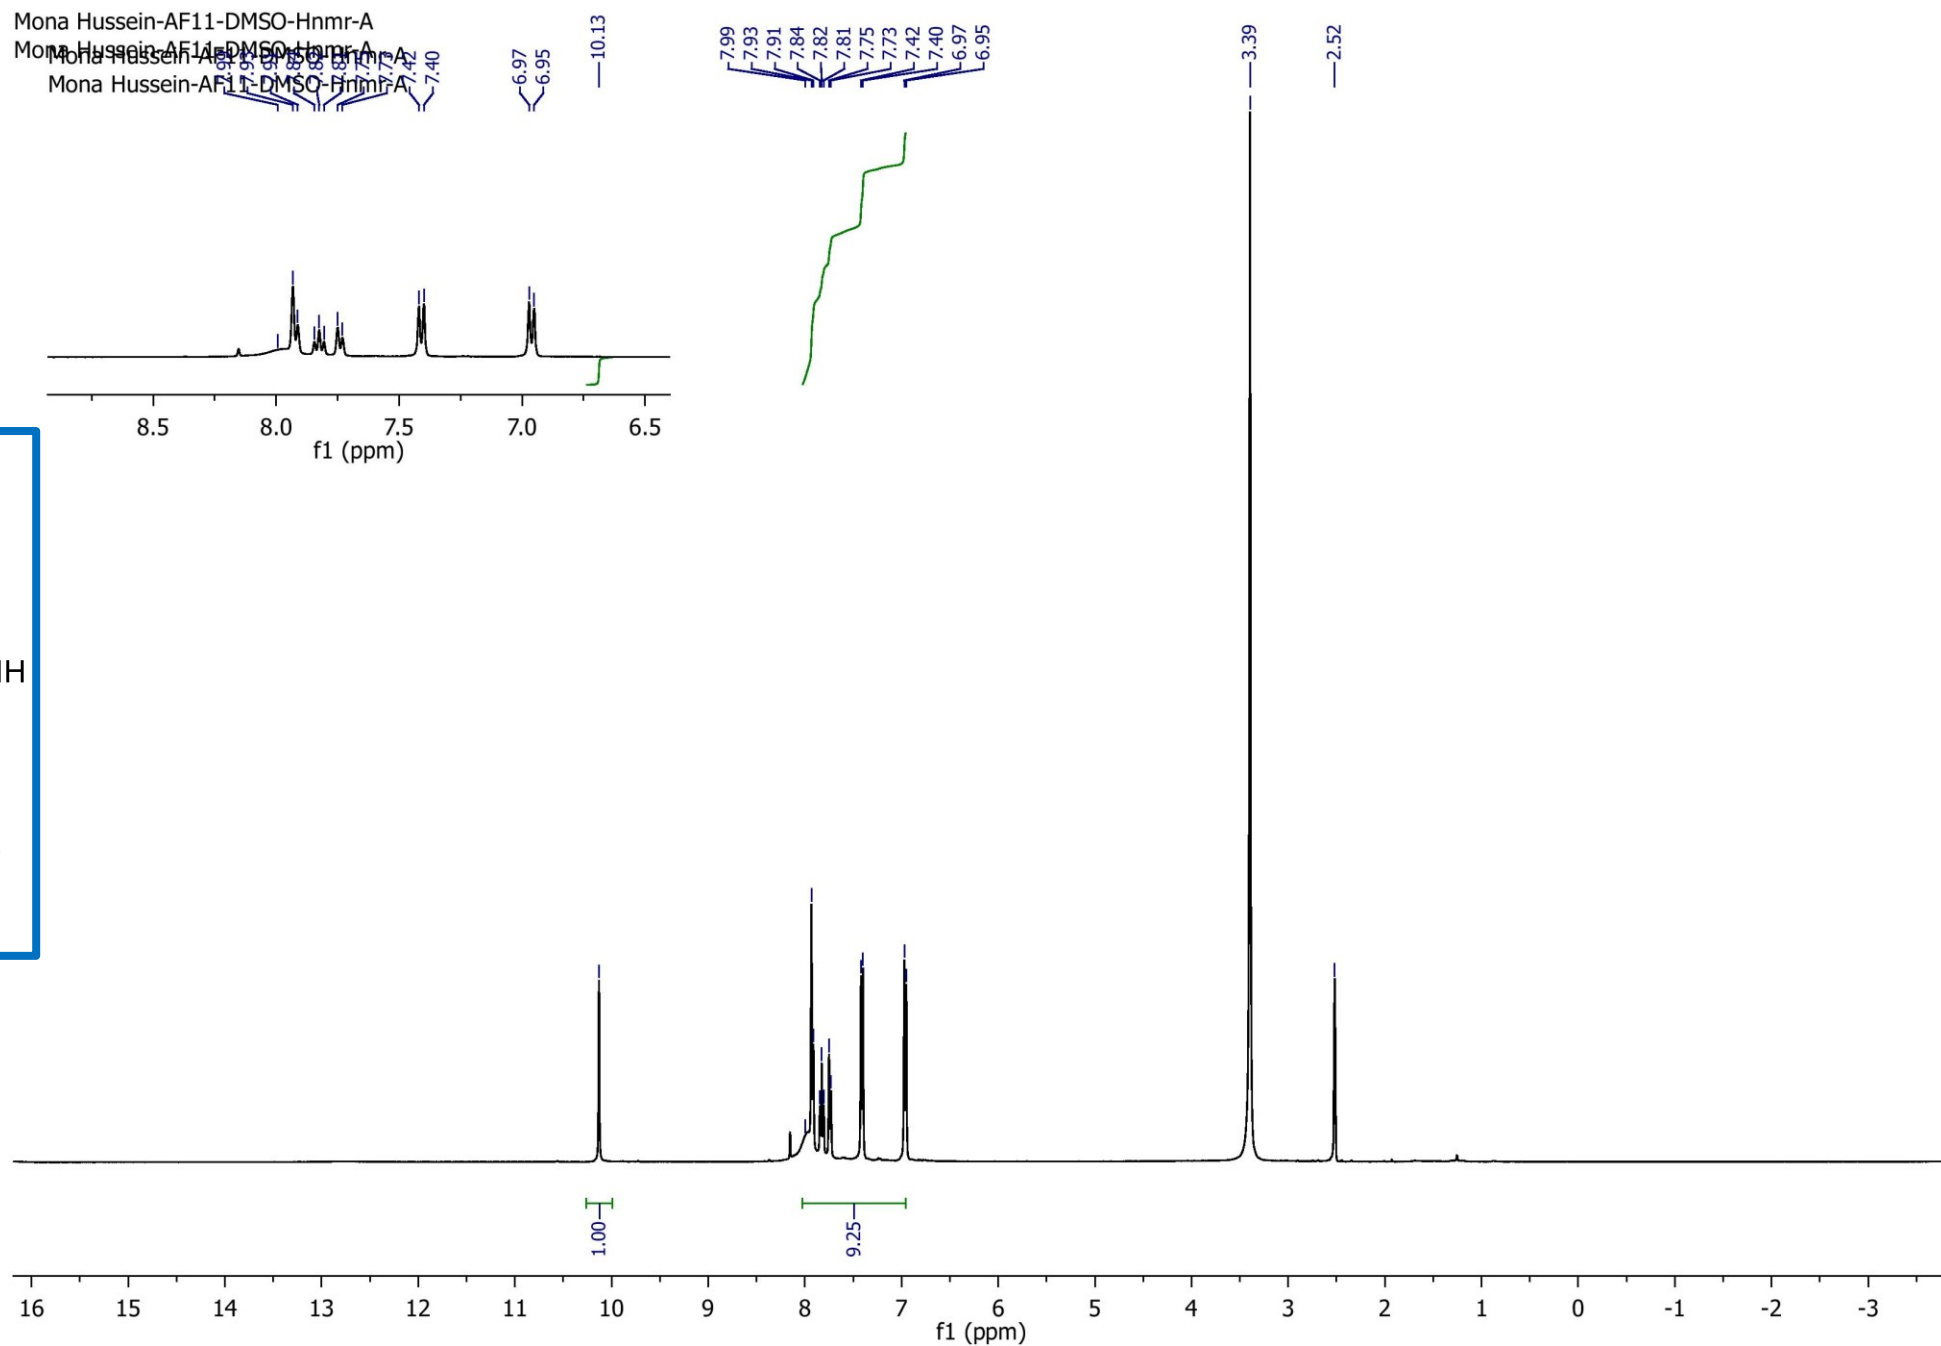

Mona Hussein-AF11-D2O-A  
Mona Hussein-AF11-D2O-A

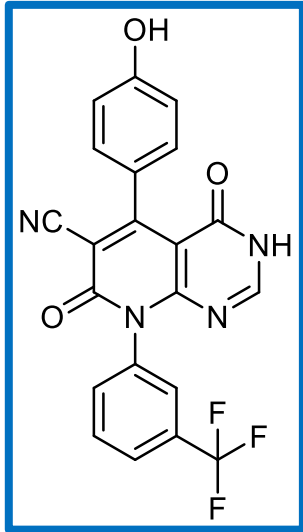

6a

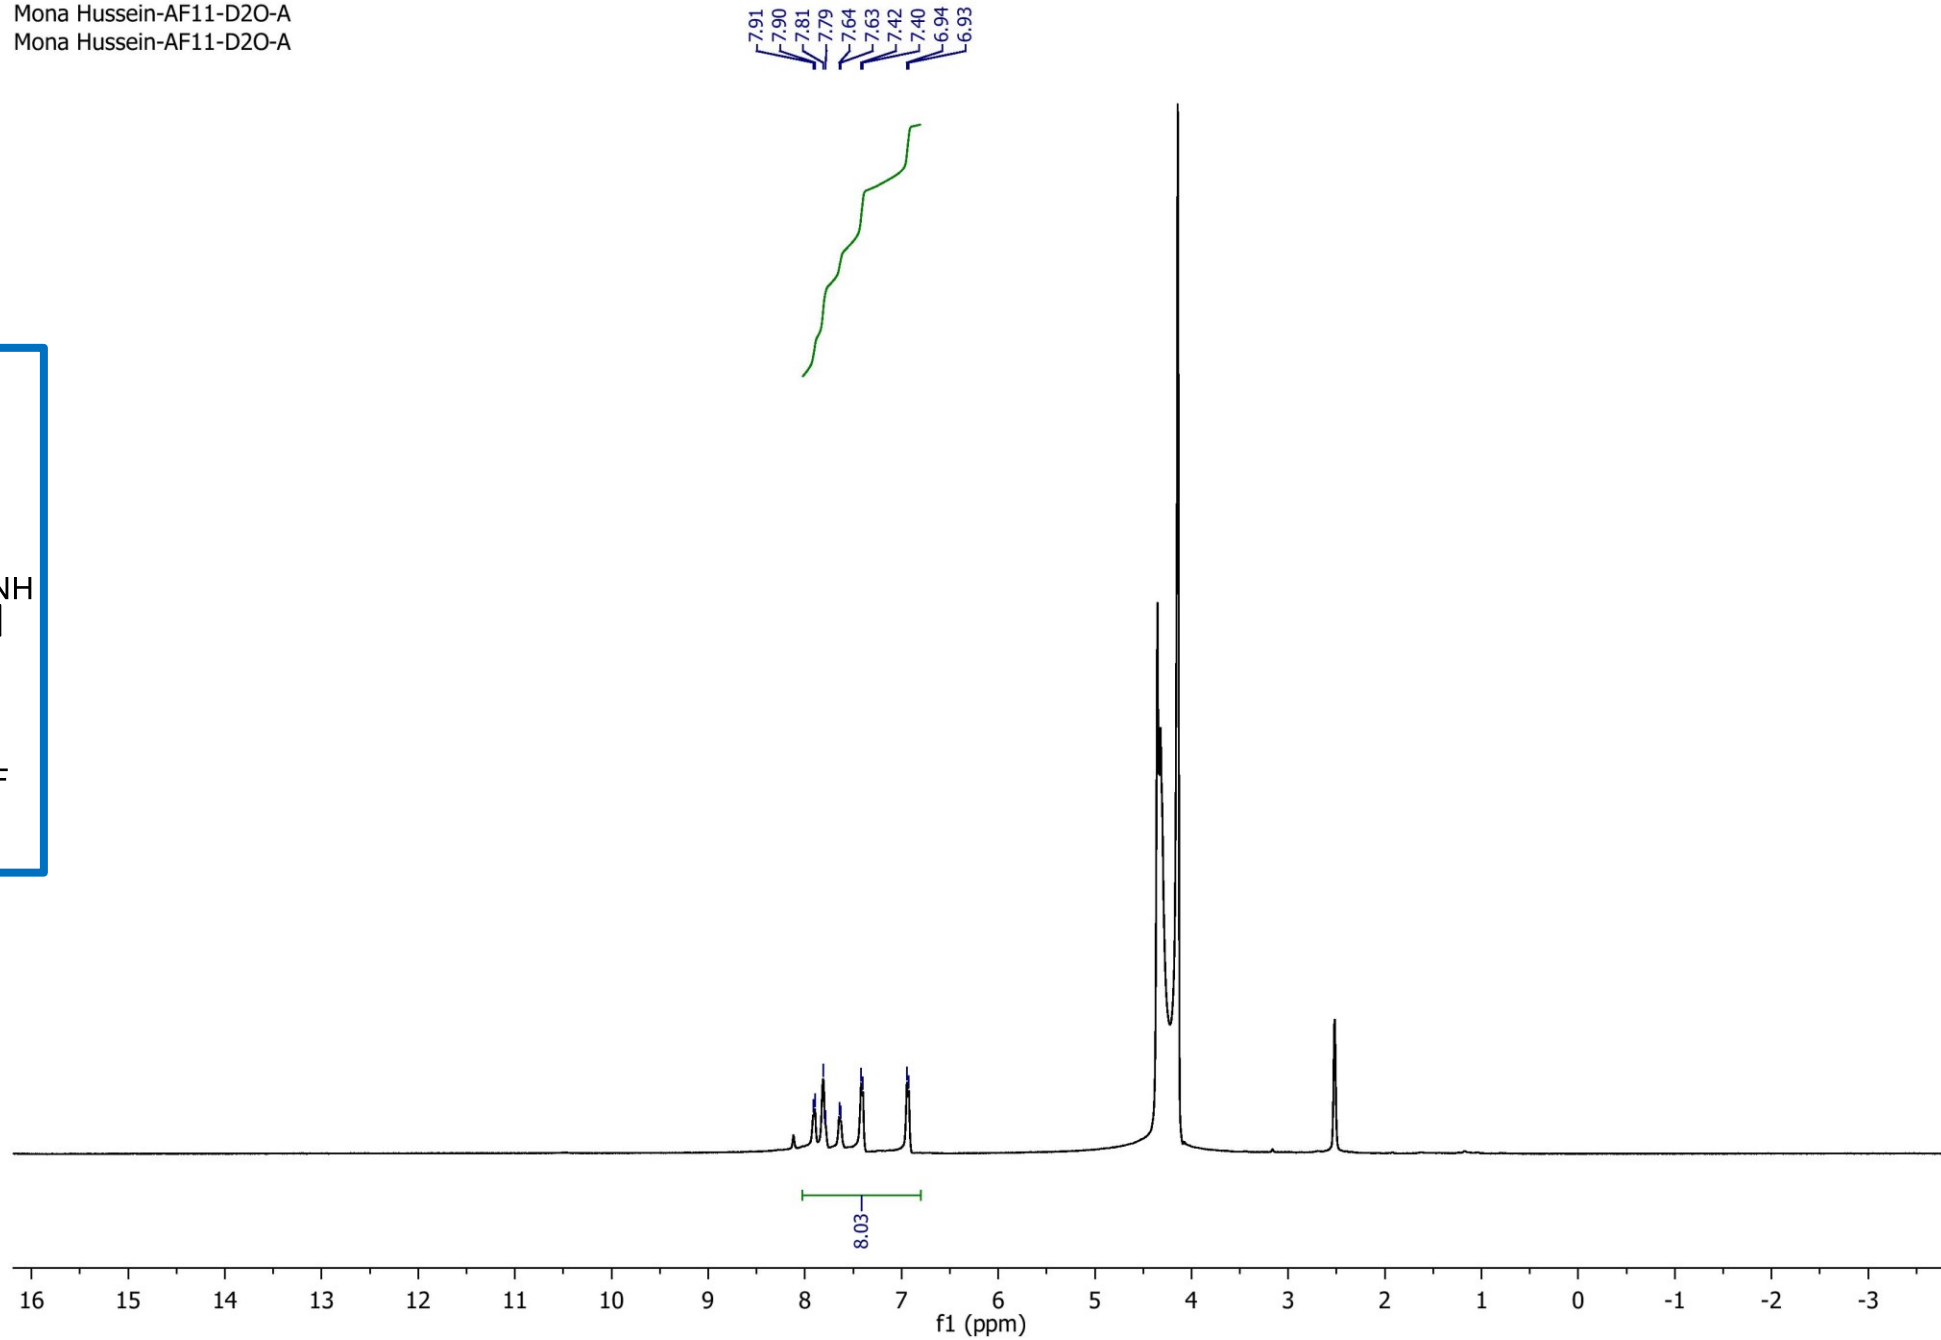

Mona Hussein-AF11-DMSO-C13nmr-A  
Mona Hussein-AF11-DMSO-C13nmr-A

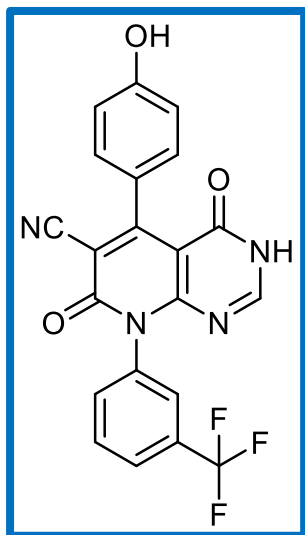

6a

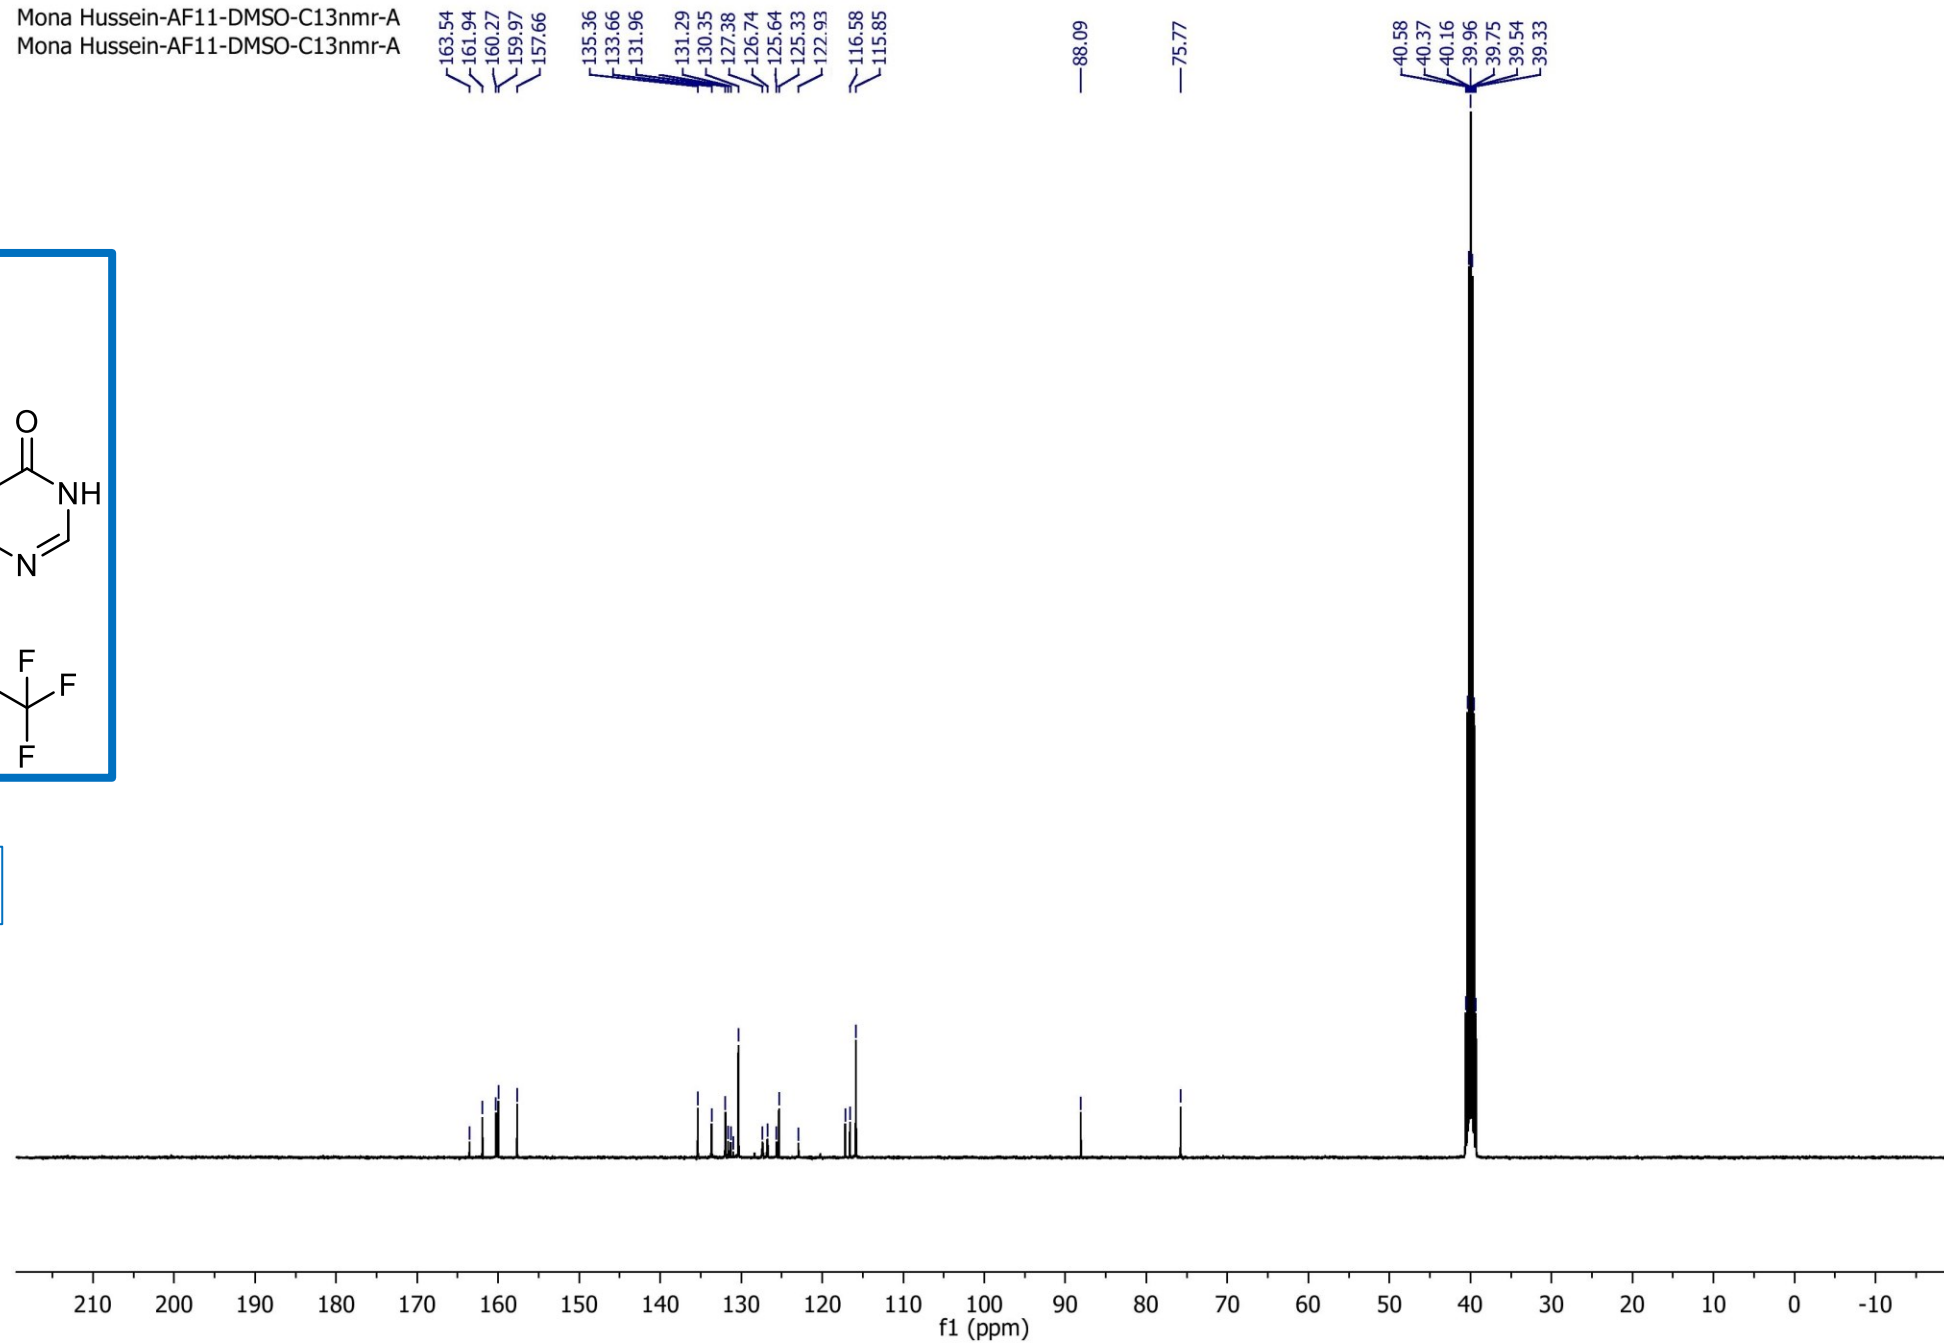

Mona Hussein-A10A-AS-proton  
Mona Hussein-A10A-AS-proton

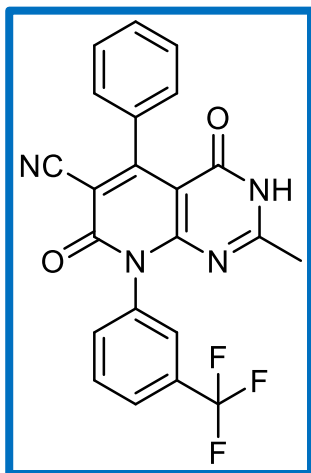

7a

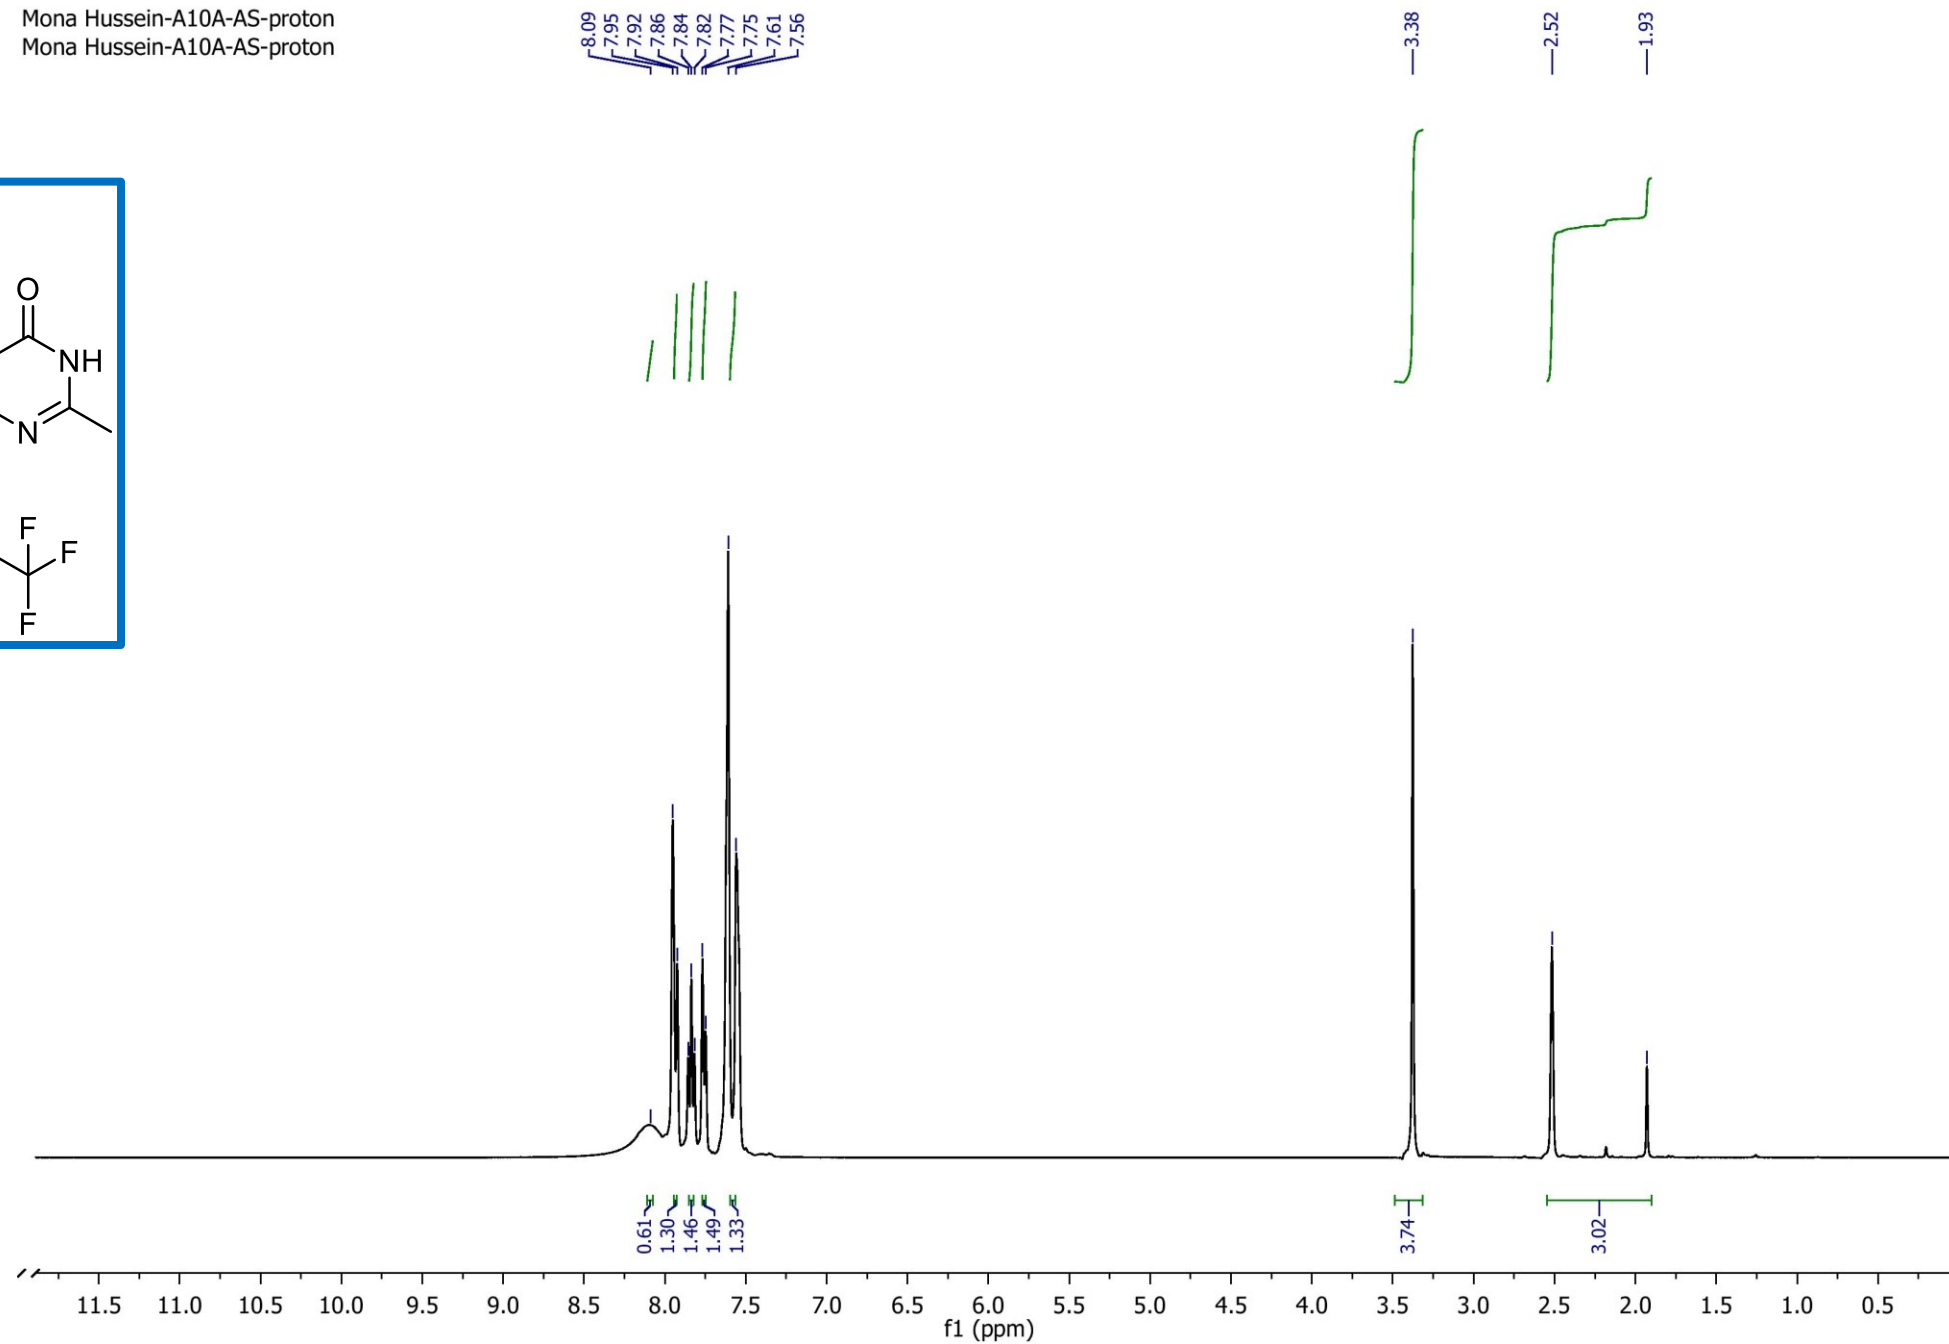



Mona hussin-A10A-carbon-ES  
Mona hussin-A10A-carbon-ES

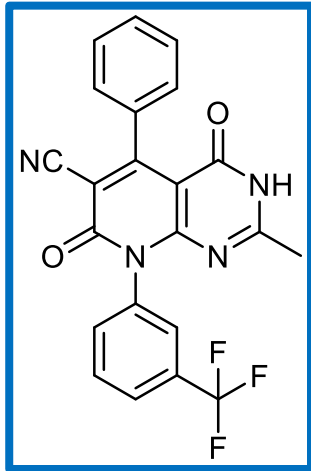

7a

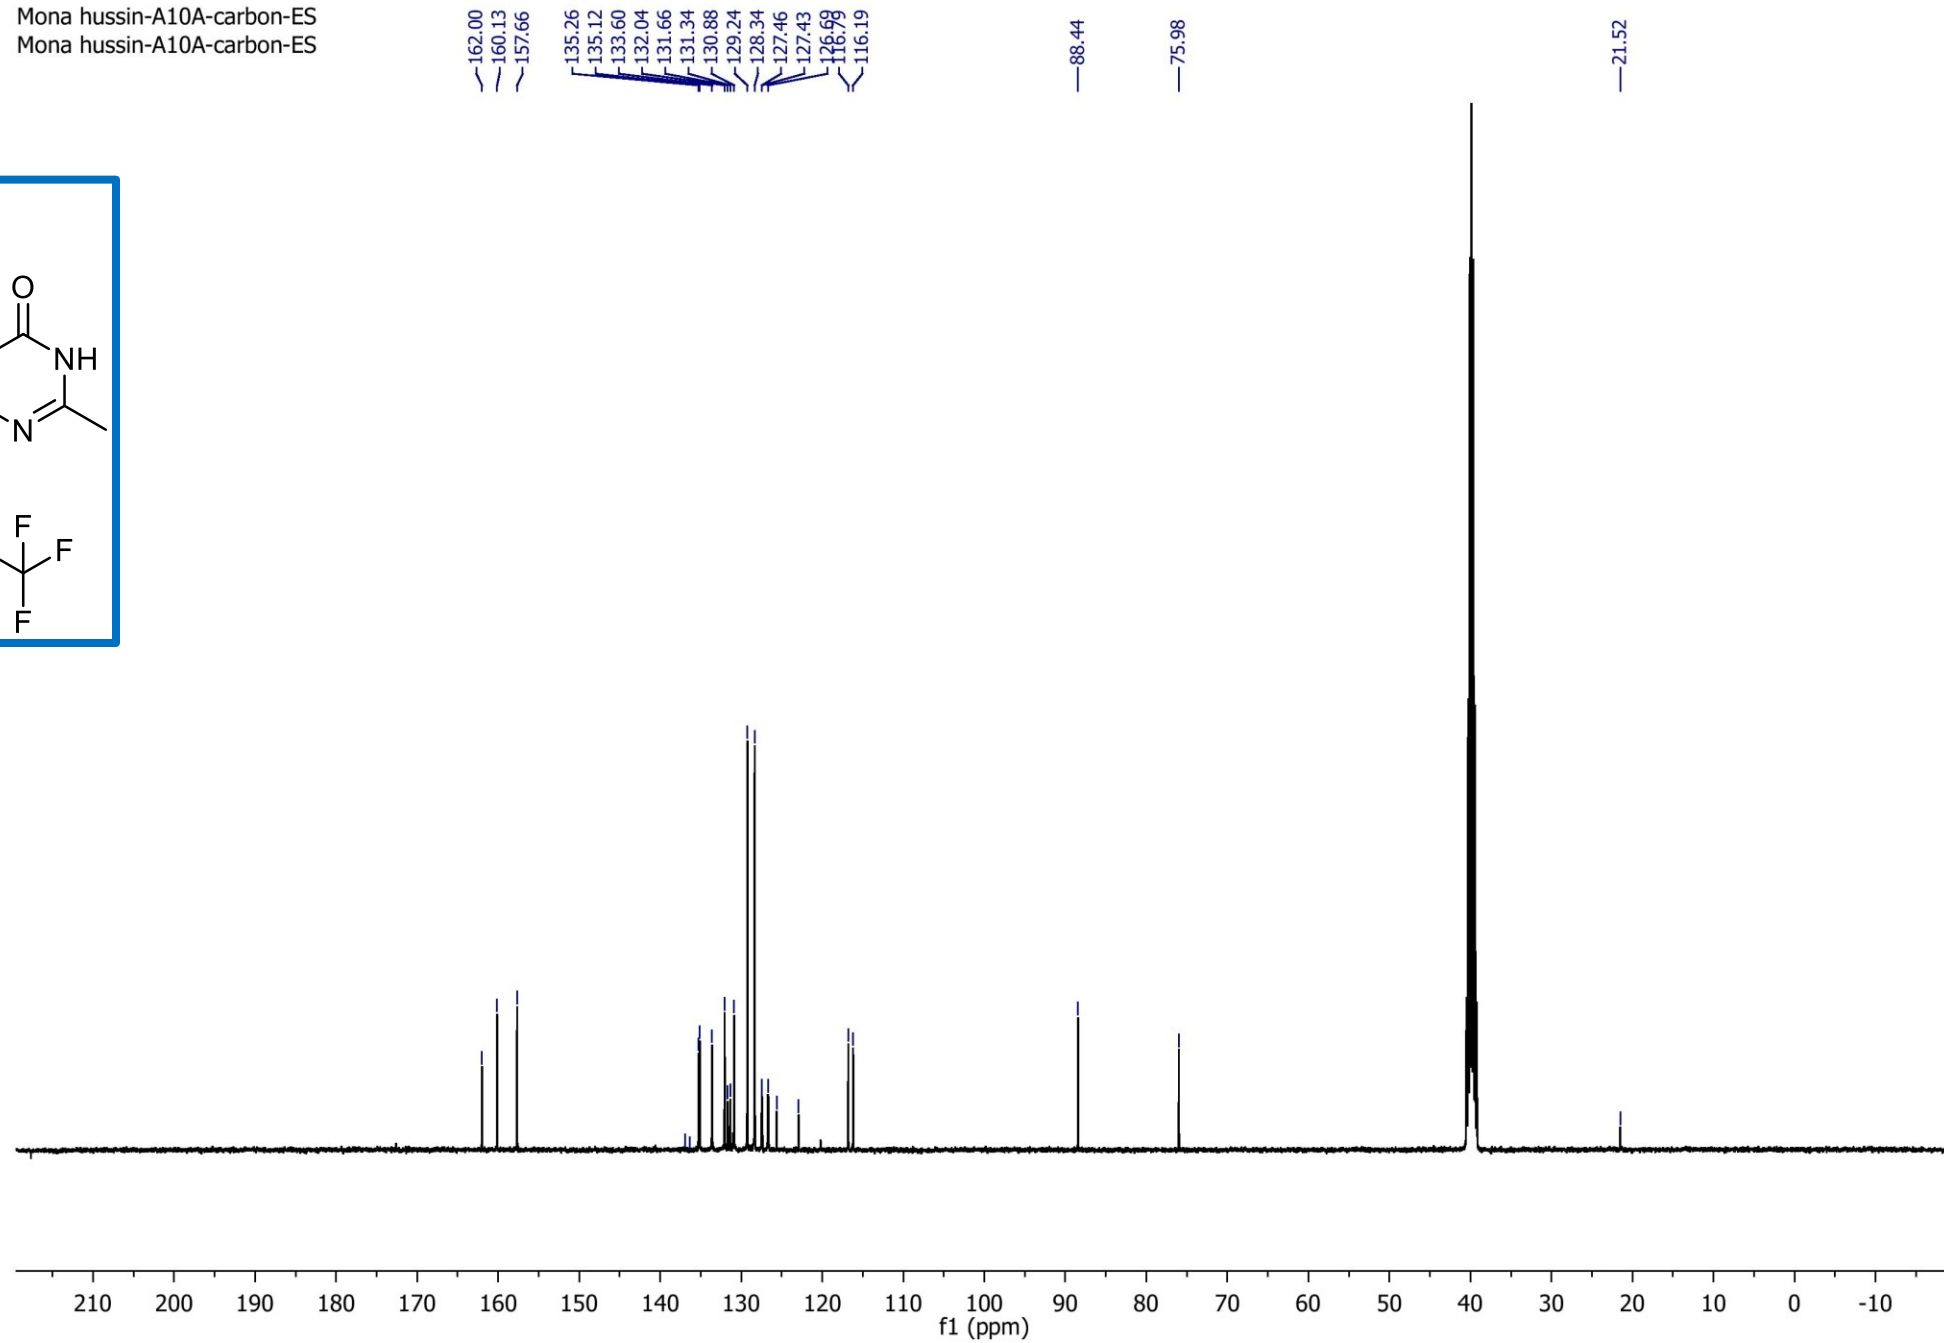

mona hussain -A6A-Hnmr-OWr  
mona hussain -A6A-Hnmr-

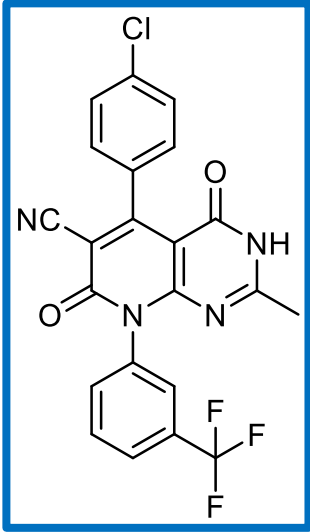

7b

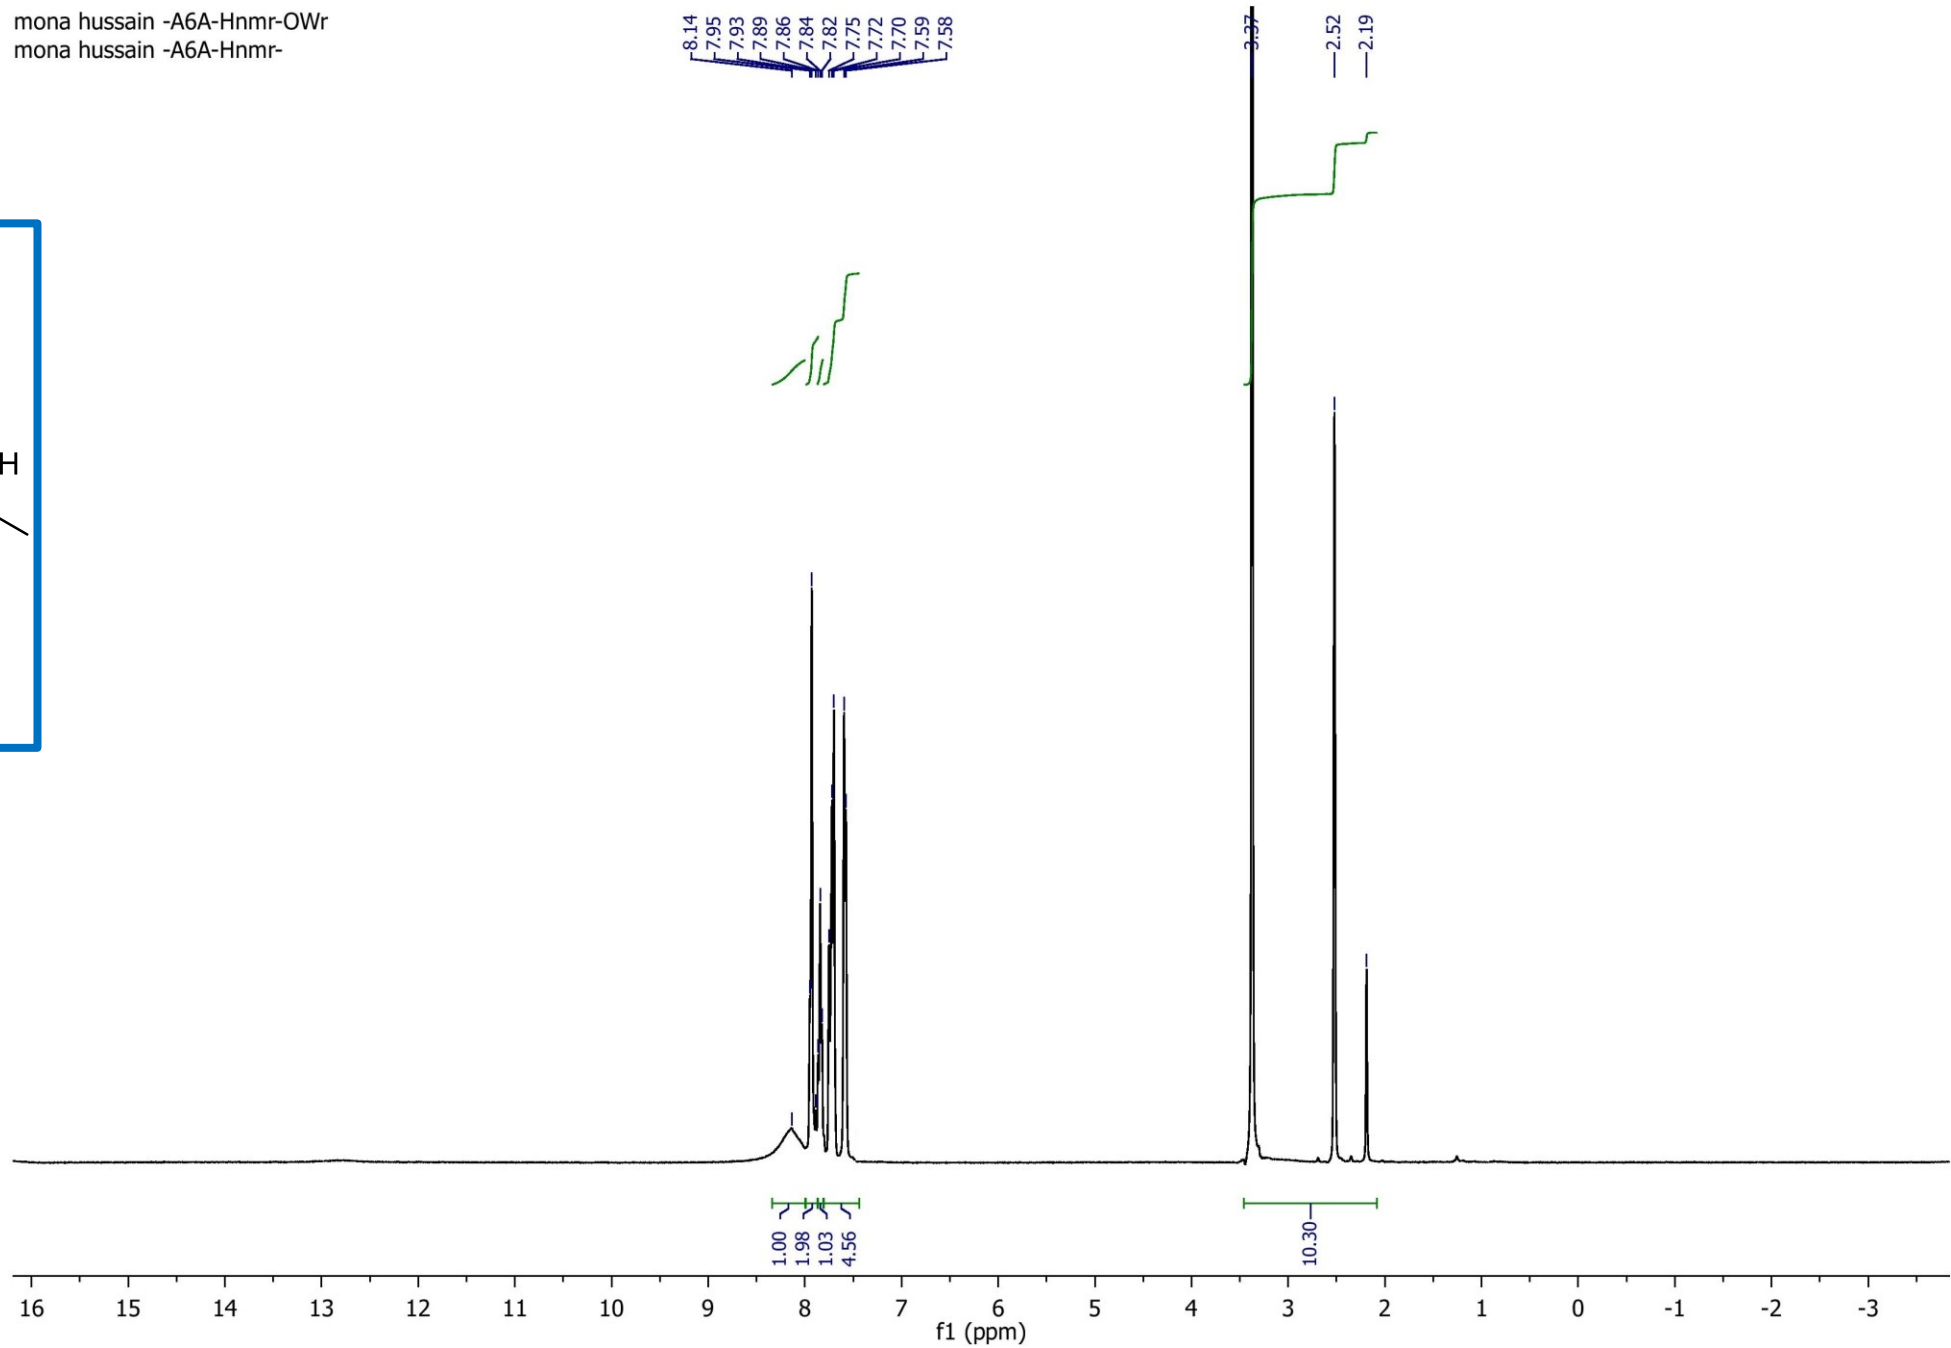

mona hussain -A6A-carbon-WH  
mona hussain -A6A-carbon-WH

163.78  
160.89  
159.77  
157.66

137.40  
135.89  
134.91  
133.98  
131.78  
130.27  
129.38  
127.27  
126.67  
125.63  
122.92  
116.65  
116.02

88.38

76.02

22.38

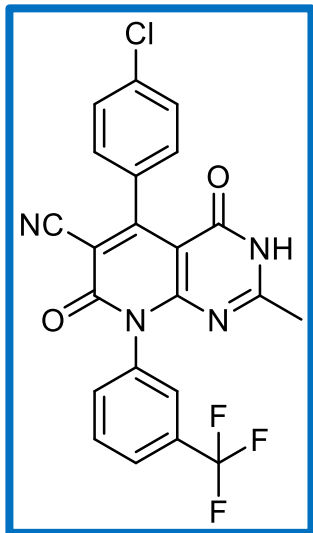

7b

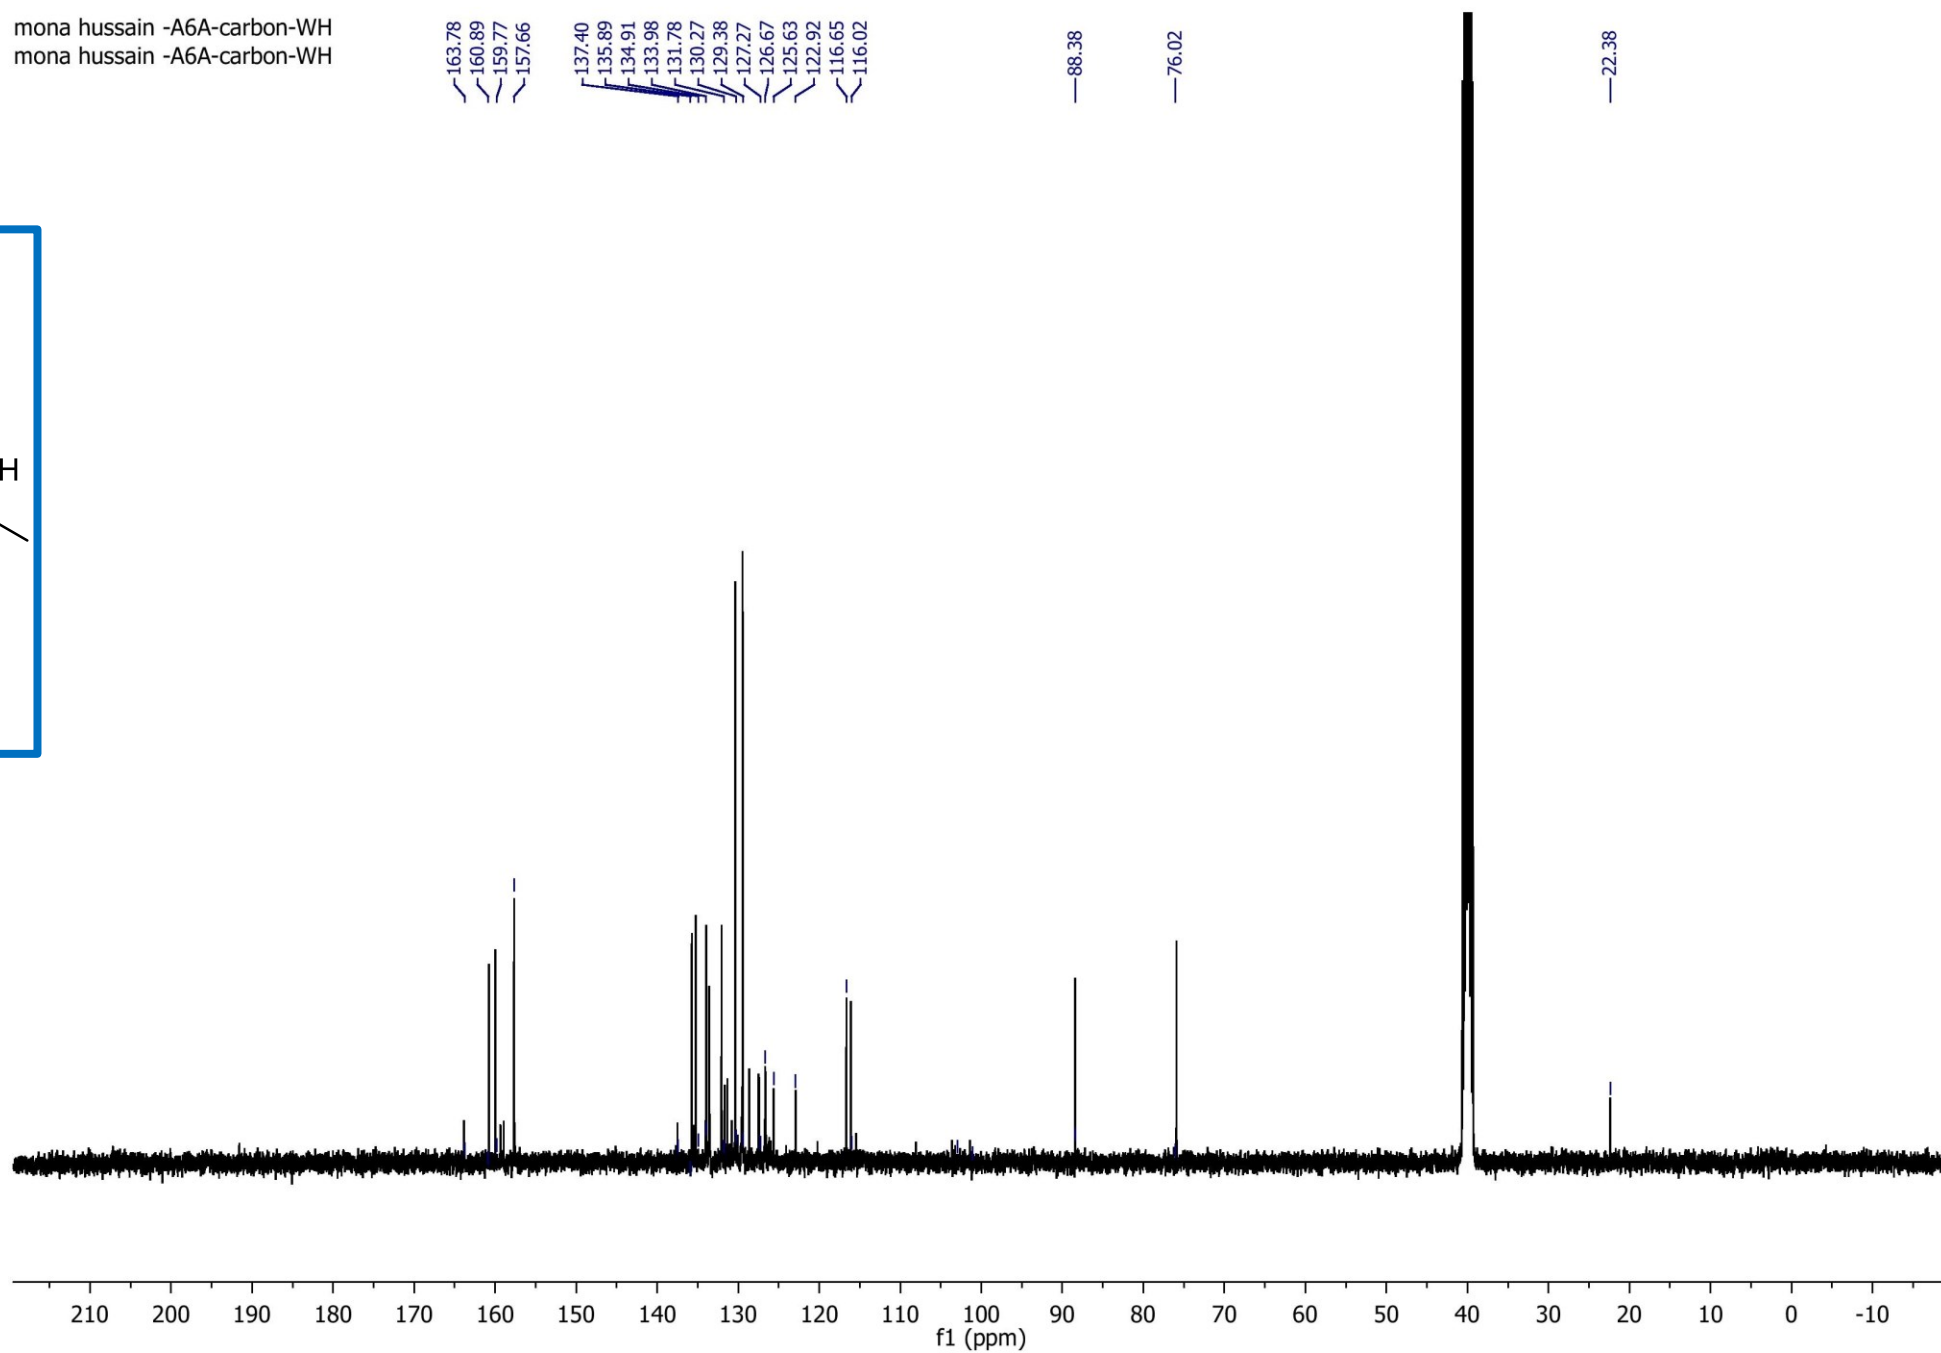

Mona Hussein-AA7-AS-proton  
Mona Hussein-AA7-AS-proton

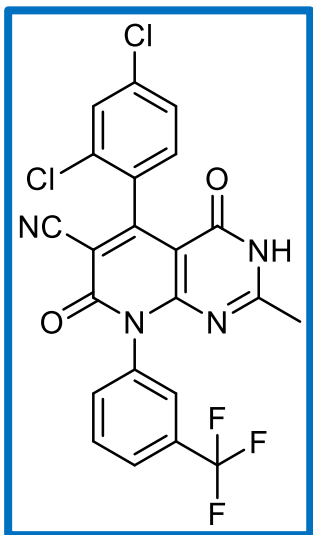

7c

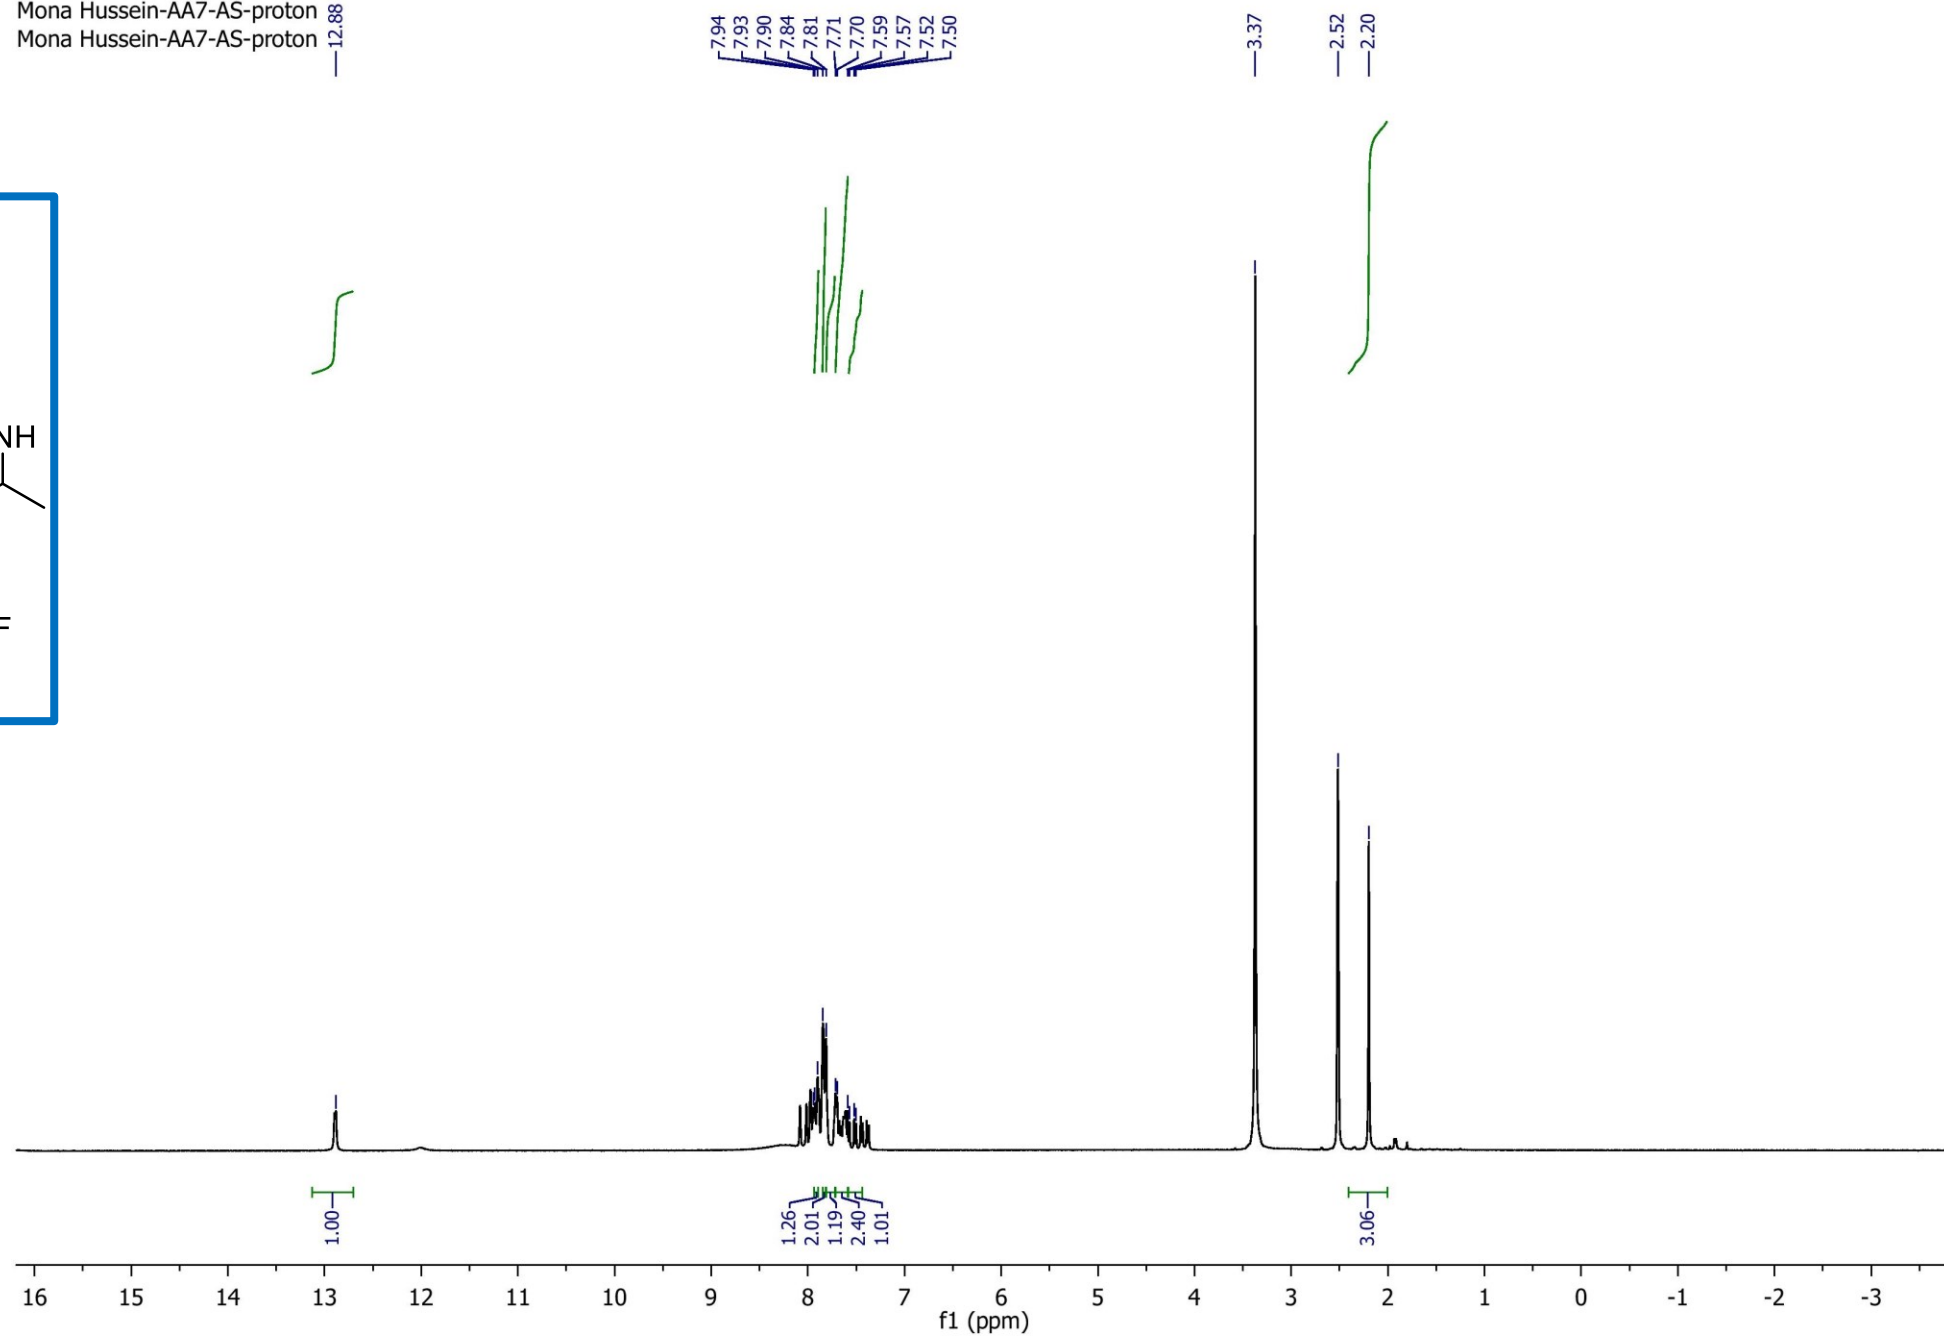

Mona Hussein-A11A-DMSO-Hnmr-A  
Mona Hussein-A11A-DMSO-Hnmr-A

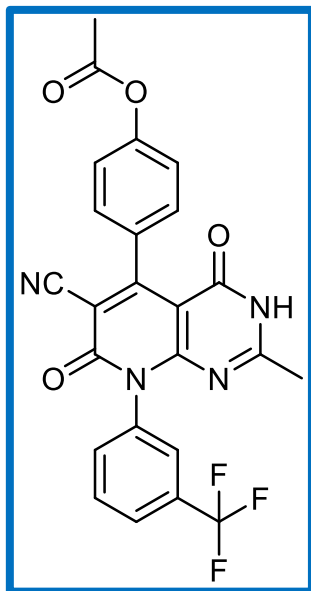

7d

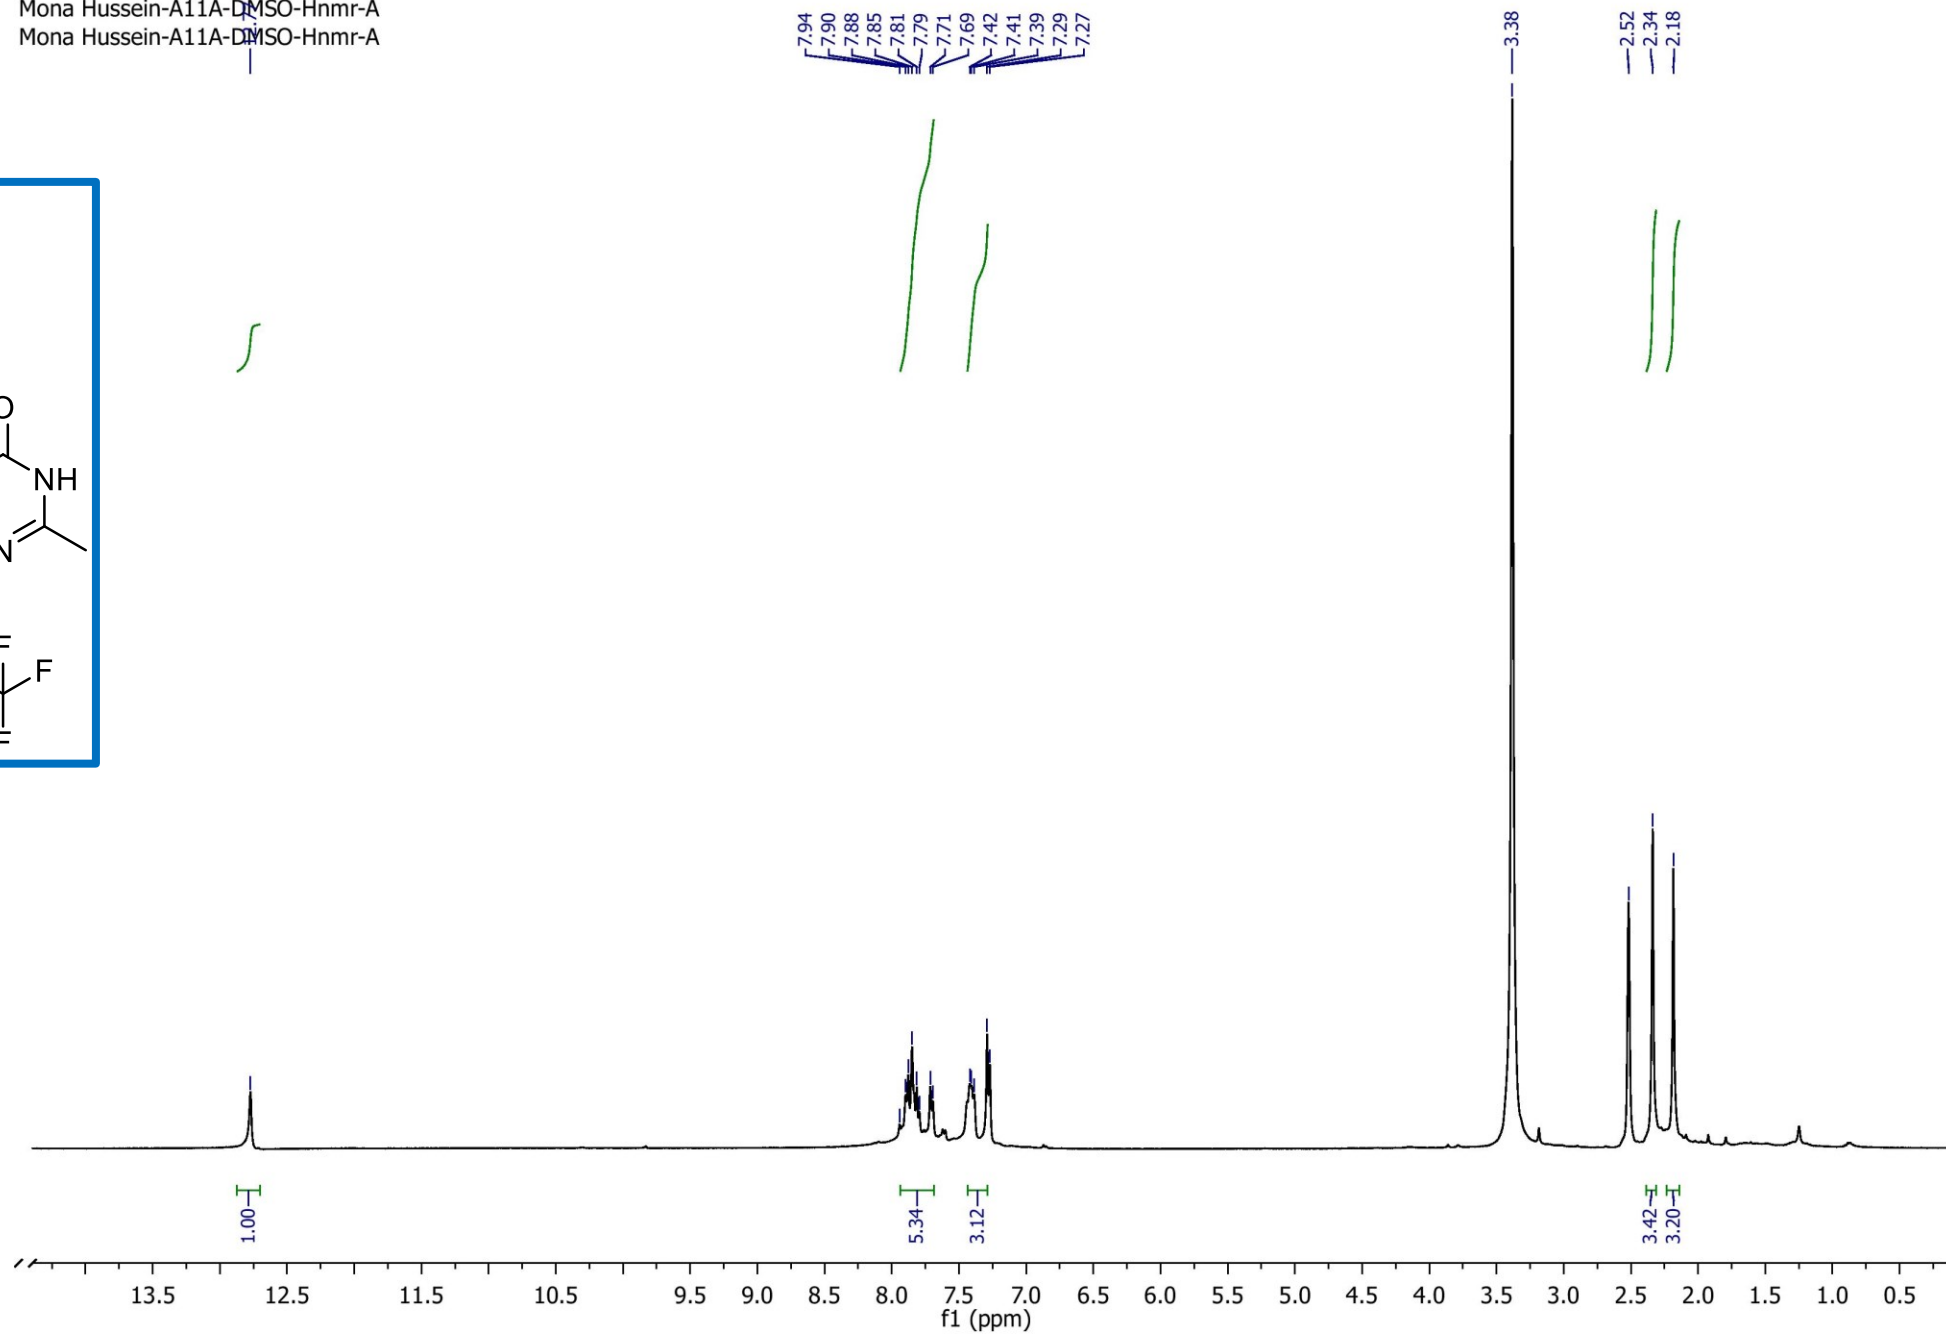

Mona Hussein-A11A-DMSO-C13nmr-A  
Mona Hussein-A11A-DMSO-C13nmr-A

169.45 163.71 160.04 159.87 158.88 157.56 151.29 137.57 133.85 133.56 130.75 130.06 128.97 126.26 125.97 125.93 121.82 121.82 103.74 101.45 40.59 40.38 40.18 39.76 39.55 39.34 22.34 21.45

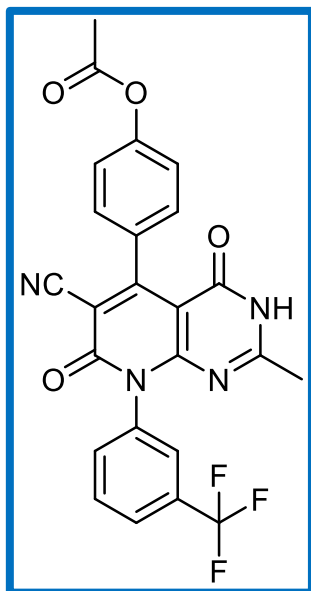

7d

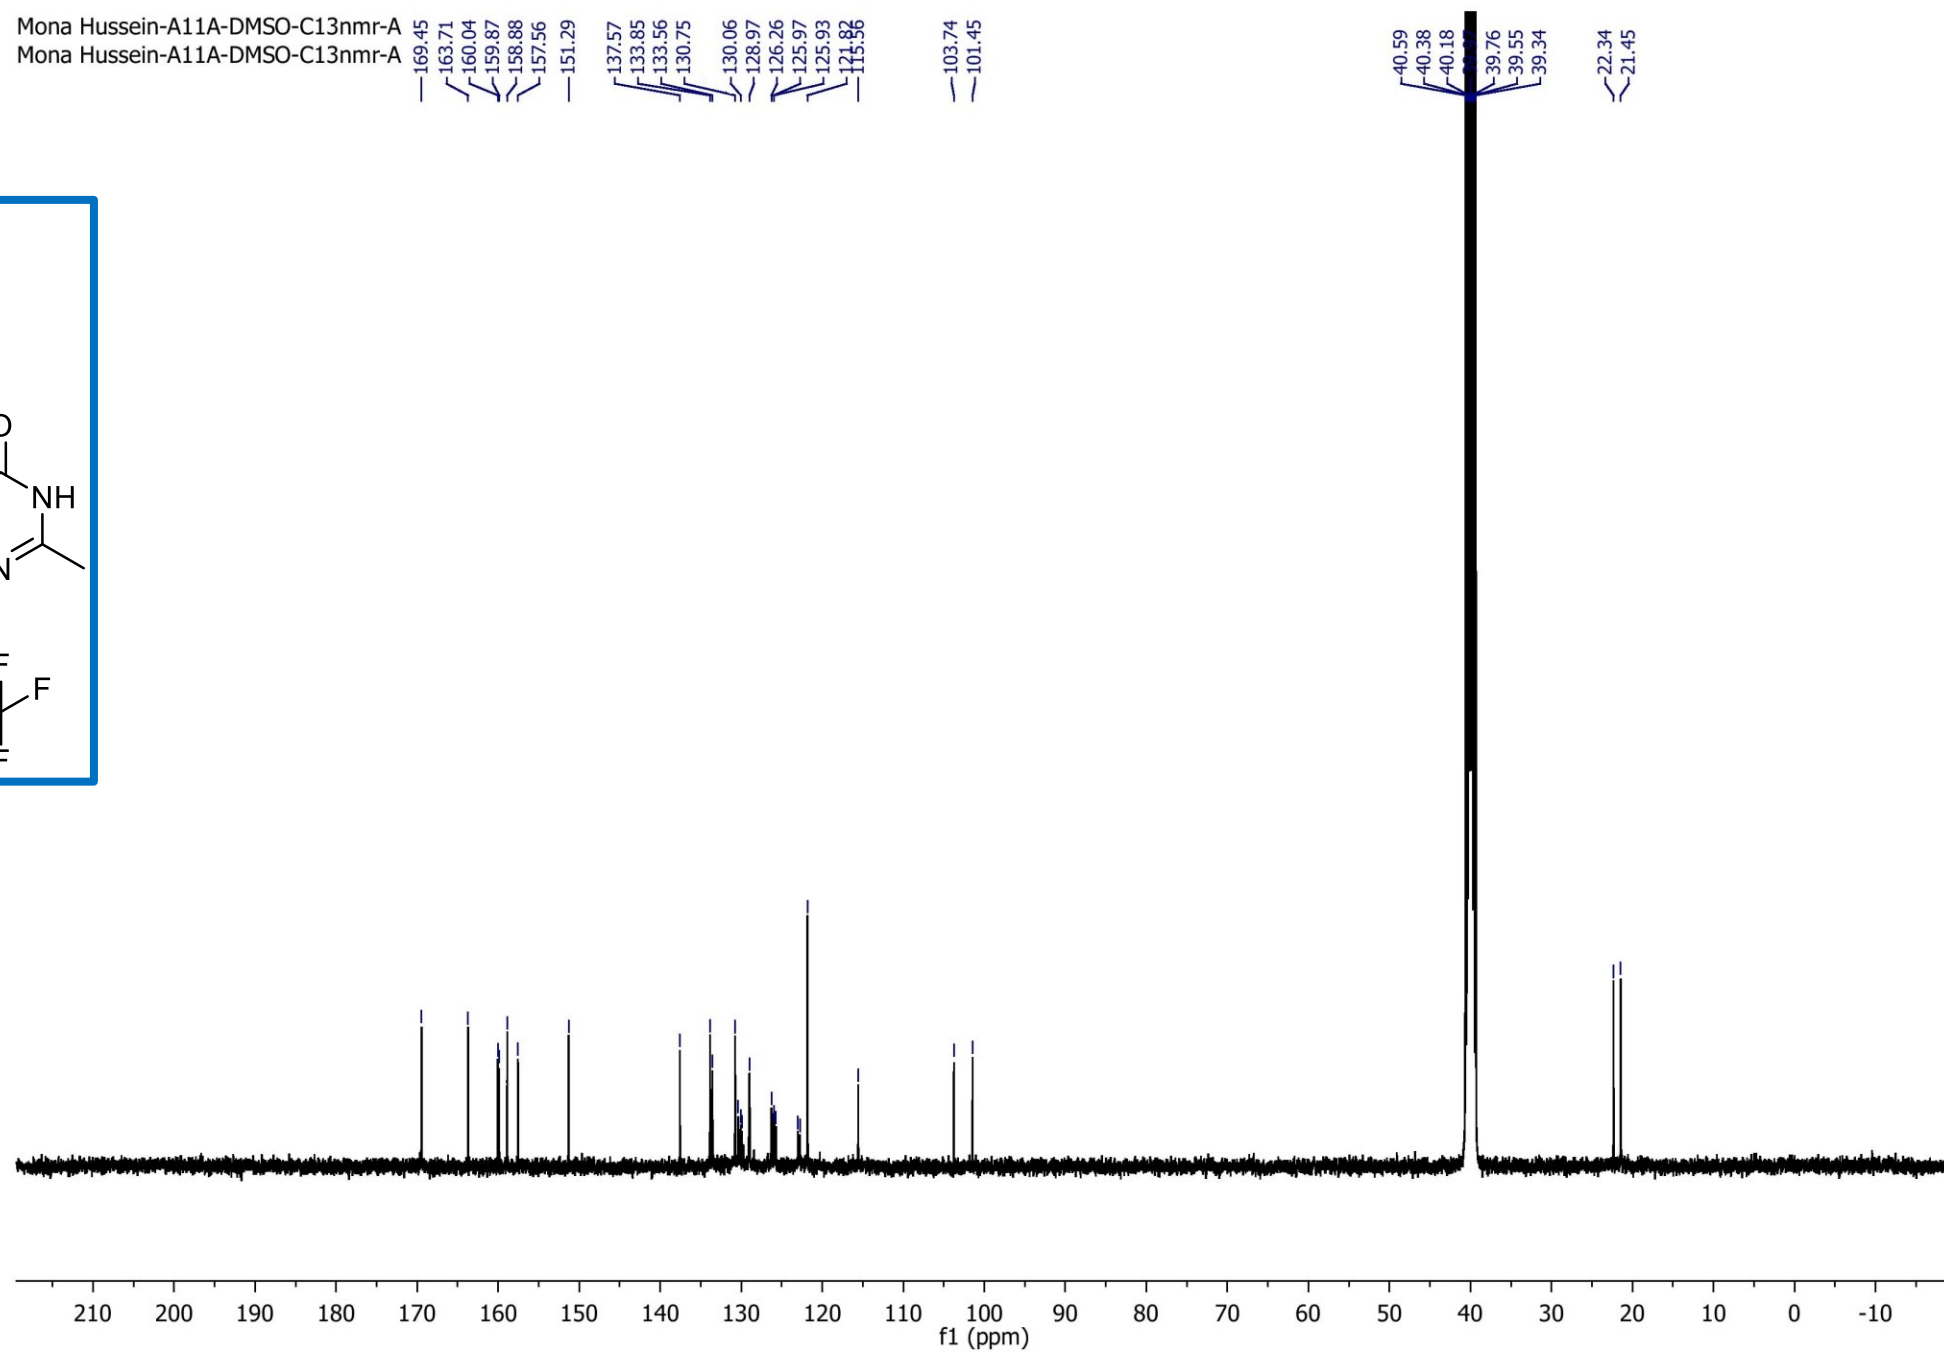

Supplement: s1 [file s1]
